# Supplementary material for: Electrochemical bromocyclization enables 3,5-diversification of heterocyclic indolines
Source: Royal Society of Chemistry journal article supplement (doi:10.1039/d3ob00985h), 2023-01-01

# Electrochemical bromocyclization enables 3,5-diversification of heterocyclic indolines

Hai Ren,<sup>\*, a, b</sup> Rui-An Wang,<sup>a, b</sup> Jun Shi,<sup>a, b</sup> Jun-Rong Song,<sup>a, b</sup> Wei Wu,<sup>a, b</sup> Qin Chi,<sup>a, b</sup> Ni Zhang<sup>a, b</sup>

<sup>a</sup> State Key Laboratory of Functions and Applications of Medicinal Plants, Guizhou Medical University, Guiyang, 550014, P. R. China;

<sup>b</sup> Natural Products Research Center of Guizhou Province, Guiyang, 550014, P. R. China

E-mail: renhai@gmc.edu.cn/renh0206@163.com

## Supporting Information

### Content

|                                                                                               |      |
|-----------------------------------------------------------------------------------------------|------|
| 1. General Information.....                                                                   | S-1  |
| 2. Optimization of the reaction conditions.....                                               | S-2  |
| 3. Control experiments .....                                                                  | S-5  |
| 4. Experimental procedures and characterizations .....                                        | S-7  |
| 5. Scale-up experiments.....                                                                  | S-17 |
| 6. Synthetic transformations and applications.....                                            | S-18 |
| 7. X-ray Dates .....                                                                          | S-29 |
| 8. References.....                                                                            | S-31 |
| 9. <sup>1</sup> H NMR, <sup>13</sup> C NMR and <sup>19</sup> F NMR spectra of compounds ..... | S-32 |

## 1. General Information

All solvents and reagents were obtained from commercial sources and were purified according to standard procedures before use (unless stated otherwise). Column chromatography was performed on silica gel (Qingdao, 300 - 400 mesh) using the indicated eluents.  $^1\text{H}$  and  $^{13}\text{C}$  NMR data were collected on a Varian Mercury 400 MHz or Agilent Mercury 600 MHz NMR spectrometer at room temperature using chloroform-*d* or DMSO-*d*<sub>6</sub> as a solvent and TMS as an internal standard, and chemical shift ( $\delta$ ) was expressed in parts per million (ppm).  $^1\text{H}$  and  $^{13}\text{C}$  NMR spectra were internally referenced to the proton ( $^1\text{H}$ ) of the internal TMS signal at 0.00 ppm or the solvent residue of DMSO-*d*<sub>6</sub> at 2.50 ppm and the residual carbon nuclei ( $^{13}\text{C}$ ) of the solvent at 77.0 or 39.5 ppm, respectively. The following abbreviations were used in expressing the multiplicity: s = singlet, brs = broad singlet, d = doublet, t = triplet, q = quartet, m = multiplet. High resolution mass spectra (HRMS-ESI) were recorded on a Bruker ESI-QTOF mass spectrometer. The course of the reactions was monitored by thin-layer chromatography (TLC). Melting points are measured in WRX-4 melting point apparatus purchased from Shanghai YICE Instrumental Company. The NaBr was obtained commercially and used directly without further purification.

## 2. Optimization of the reaction conditions

### 2.1 Electrolysis general informations

Electrochemical reactions were performed with ElectraSyn 2.0 package (IKA) using the constant current or constant voltage modes. The reactions were conducted in a 10 mL vial for 4 mL of solvent with a stir bar and a carbon graphite-SK-50 (5.0 × 0.8 × 0.2 cm) working electrode (anode and cathode) with a distance of 0.6 cm between the two electrodes.

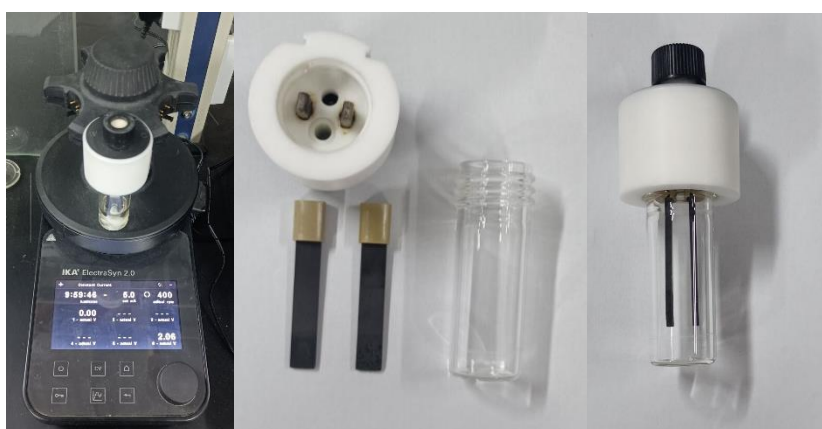

## 2.2 Conditions screening <sup>a</sup>

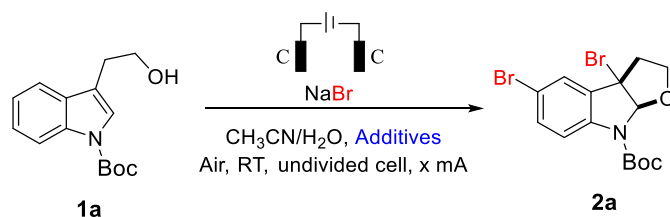

**Table S1**

| Entry | NaBr<br>(x equiv.) | Additives                                                 | CCE<br>(mA) | H <sub>2</sub> O<br>(μL) | Time<br>(h) | <b>2a</b><br>(%) |
|-------|--------------------|-----------------------------------------------------------|-------------|--------------------------|-------------|------------------|
| 1     | 2                  | -                                                         | 5           | 100                      | 12          | 31               |
| 2     | 2.5                | -                                                         | 5           | 0                        | 12          | 35               |
| 3     | 3                  | -                                                         | 5           | 100                      | 12          | 35               |
| 4     | 4                  | -                                                         | 5           | 0                        | 12          | 40               |
| 5     | 2.5                | CH <sub>3</sub> CO <sub>2</sub> H (10 μL)                 | 5           | 100                      | 12          | 66               |
| 6     | 2.5                | CH <sub>3</sub> CO <sub>2</sub> H (20 μL)                 | 5           | 100                      | 12          | 70               |
| 7     | 2.5                | CH <sub>3</sub> CO <sub>2</sub> H (30 μL)                 | 5           | 100                      | 12          | 71               |
| 8     | 2.5                | CH <sub>3</sub> CO <sub>2</sub> H (50 μL)                 | 5           | 100                      | 12          | 59               |
| 9     | 2.5                | CH <sub>3</sub> CO <sub>2</sub> H (30 μL)                 | 5           | 30                       | 12          | 78               |
| 10    | 2.5                | CH <sub>3</sub> CO <sub>2</sub> H (30 μL)                 | 5           | 50                       | 9           | 75               |
| 11    | 2.5                | CH <sub>3</sub> CO <sub>2</sub> H (30 μL)                 | 5           | 80                       | 9           | 61               |
| 12    | 2.5                | CH <sub>3</sub> CO <sub>2</sub> H (30 μL)                 | 10          | 30                       | 4           | 85               |
| 13    | 2.5                | CH <sub>3</sub> CO <sub>2</sub> H (20 μL)                 | 10          | 30                       | 3           | 85               |
| 14    | 2.5                | CH <sub>3</sub> CO <sub>2</sub> H (20 μL)                 | 10          | -                        | 12          | 0                |
| 15    | 2.5                | -                                                         | 10          | 30                       | 3           | 17               |
| 16    | 2.5                | CH <sub>3</sub> CO <sub>2</sub> H (20 μL)                 | -           | 30                       | 12          | 0                |
| 17    | 2.5                | PhCO <sub>2</sub> H (40 μL)                               | 10          | 30                       | 3           | 84               |
| 18    | 2.5                | EtOH (20 μL)                                              | 10          | 30                       | 3           | 24               |
| 19    | 2.5                | HFIP (37 μL)                                              | 10          | 30                       | 3           | 0                |
| 20    | 2.5                | CH <sub>3</sub> SO <sub>3</sub> H (23 μL)                 | 10          | 30                       | 3           | 67               |
| 21    | 2.5                | C <sub>2</sub> H <sub>5</sub> CO <sub>2</sub> H (26 μL)   | 10          | 30                       | 3           | 84               |
| 22    | 2.5                | CH <sub>3</sub> CO <sub>2</sub> Na (28.7 mg)              | 10          | 30                       | 3           | trace            |
| 23    | 2.5                | CH <sub>3</sub> CO <sub>2</sub> NH <sub>4</sub> (27.0 mg) | 10          | 30                       | 3           | trace            |

<sup>a</sup> Conditions: undivided cell, carbon-cloth anode and cathode, **1a** (0.2 mmol), NaBr, CH<sub>3</sub>CN (4 mL), H<sub>2</sub>O (30 μL), Additives (CH<sub>3</sub>CO<sub>2</sub>H, 20 μL = 0.35 mmol), 3 – 12 h (13.6 – 37.6 F mol<sup>-1</sup>), RT, under air. Yields are isolated by column chromatography. CCE = constant current electrolysis.



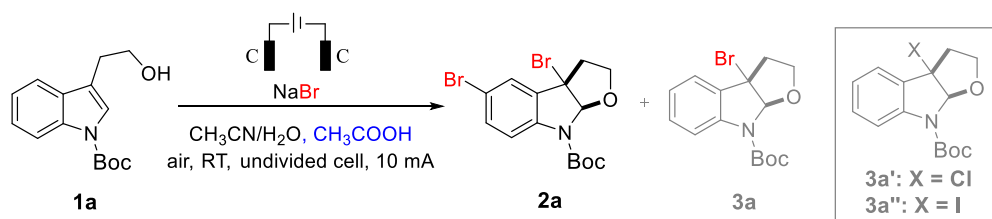

**Table S2**

| Entry | Derivation from standard conditions                                                          | <b>2a</b> (%) | <b>3a</b> (%)        |
|-------|----------------------------------------------------------------------------------------------|---------------|----------------------|
| 1     | None                                                                                         | 85            | 0                    |
| 2     | Without CH <sub>3</sub> CO <sub>2</sub> H                                                    | 17            | 79                   |
| 3     | Without H <sub>2</sub> O                                                                     | 0             | 89                   |
| 4     | EtOH instead of CH <sub>3</sub> CO <sub>2</sub> H                                            | 24            | 72                   |
| 5     | HFIP instead of CH <sub>3</sub> CO <sub>2</sub> H                                            | 0             | 38                   |
| 6     | CH <sub>3</sub> SO <sub>3</sub> H instead of CH <sub>3</sub> CO <sub>2</sub> H               | 67            | 0                    |
| 7     | C <sub>2</sub> H <sub>5</sub> CO <sub>2</sub> H instead of CH <sub>3</sub> CO <sub>2</sub> H | 84            | 0                    |
| 8     | CH <sub>3</sub> CO <sub>2</sub> Na instead of CH <sub>3</sub> CO <sub>2</sub> H              | trace         | 72                   |
| 9     | CH <sub>3</sub> CO <sub>2</sub> NH <sub>4</sub> instead of CH <sub>3</sub> CO <sub>2</sub> H | trace         | 90                   |
| 10    | CF <sub>3</sub> CO <sub>2</sub> H instead of CH <sub>3</sub> CO <sub>2</sub> H               | 0             | 78                   |
| 11    | PhCO <sub>2</sub> H instead of CH <sub>3</sub> CO <sub>2</sub> H                             | 84            | 0                    |
| 12    | 30 uL CH <sub>3</sub> CO <sub>2</sub> H                                                      | 85            | 0                    |
| 13    | No electric current                                                                          | 0             | 0                    |
| 14    | NaCl instead of NaBr                                                                         | 0             | trace ( <b>3a'</b> ) |
| 15    | NaI instead of NaBr                                                                          | 0             | 49 ( <b>3a''</b> )   |
| 16    | TBAB instead of NaBr                                                                         | 0             | 53                   |
| 17    | Pt electrode instead of C electrode                                                          | 0             | 0                    |

<sup>a</sup> Conditions: undivided cell, carbon-cloth anode and cathode, **1a** (0.2 mmol), NaBr (0.5 mmol), CH<sub>3</sub>CN (4 mL), additive H<sub>2</sub>O (30 μL), CH<sub>3</sub>CO<sub>2</sub>H (20 μL = 0.35 mmol), CCE = 10.0 mA, 3–12 h (13.6–37.6 F mol<sup>-1</sup>), RT, under air. Yields are based on product isolated by column chromatography. CCE = constant current electrolysis.

### 3. Control experiments

Several control experiments were conducted to investigate the functions of the protonic acid. In our previous work, a 4/0.1 (v/v) mixture of acetonitrile and water enabled highly selective 3-bromocyclization (**3a**: 83% yield), and a trace amount of 3,5-dibromindoline **2a** was not observed (eq. 1). When CH<sub>3</sub>COOH was added under such conditions, the 3,5-dibromindoline **2a** was obtained as the final product in 84% yield (eq. 2). These results indicate that CH<sub>3</sub>COOH plays a key role in the 5-bromination process. When CH<sub>3</sub>COONa or CH<sub>3</sub>COONH<sub>4</sub> was used as the additive instead of CH<sub>3</sub>COOH, the dibromination reaction was significantly restrained, which suggests that the hydrogen ion (H<sup>+</sup>) plays an important role in promotion of the bromination reactions (eqs. 2 and 3). When the 3-bromindoline **3a** was employed under the optimal conditions, the 3, 5-dibromindoline **2a** was successfully obtained in high yield (eq. 5), which indicates that a cascade electrophilic C3a-bromocyclization and C5a-bromination process may be responsible for this reaction.

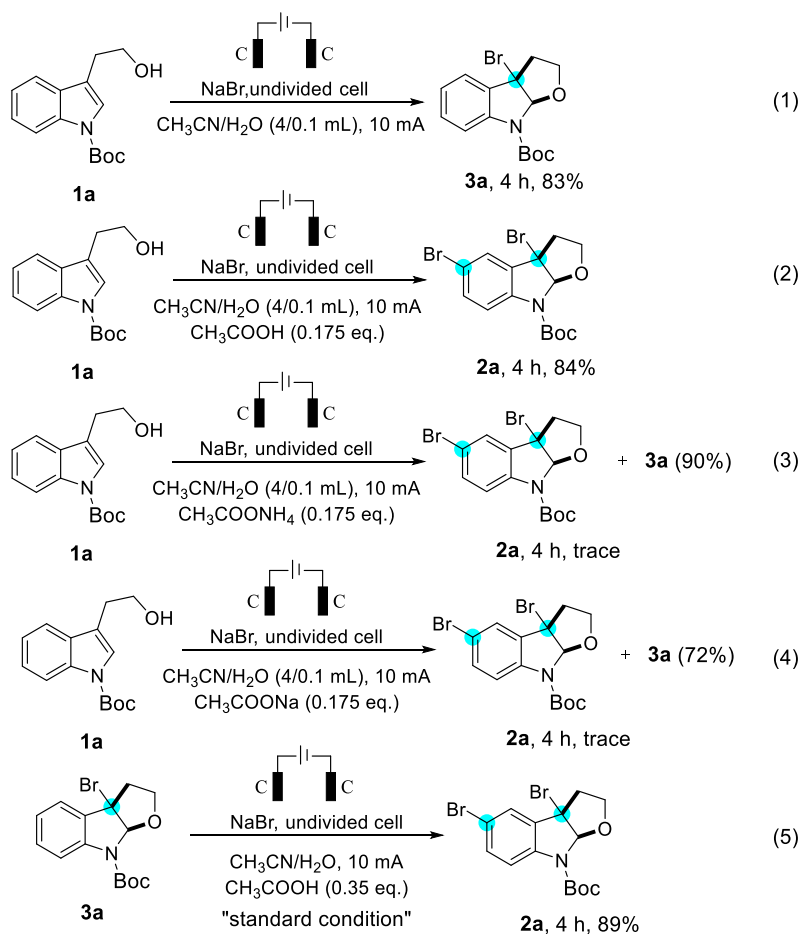

In our previous work,<sup>1</sup> a 2.5/1.5 (v/v) mixture of acetonitrile and water enabled highly selective 5-bromocyclization to form the 5-bromoindoline **19**, and none of 3,5-dibromoindoline **2a** was observed (eq. 1). The mechanism of the formation of 5-bromoindoline has been verified through a key reductive hydrodebromination of 3a-bromofuranindoline at the cathode.<sup>1</sup> On the basis of the previous conditions (eq. 1), when CH<sub>3</sub>COOH was added into this condition, the 5-bromoindoline **19** was obtained in 71% yield after 10 h and none of 3, 5-dibromoindoline **2a** was detected. These results suggested that the reductive hydrodebromination of 3a-bromoindoline at the cathode was mainly controlled by the use of more amount of water and the electrophilic 5-bromination process was accelerated by CH<sub>3</sub>COOH.

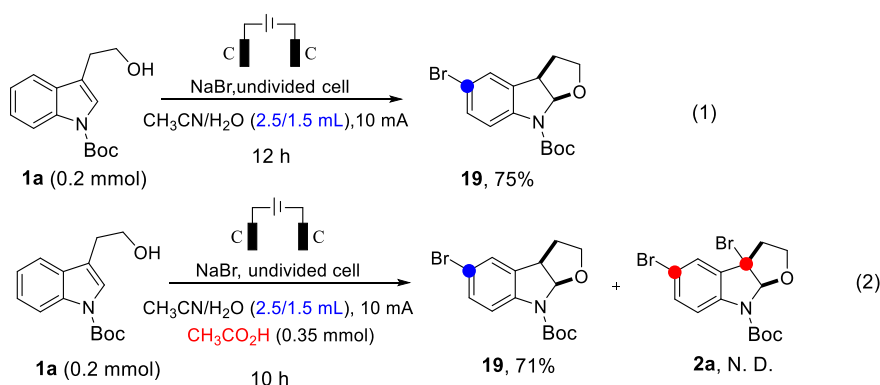

When the N-methyl indole substrates were employed in the standard conditions, none of desired dibromoindoline product was obtained and the substrates decomposed. We assumed that the electron-rich cell of indole was unstable under the current electronic oxidative conditions, an electron-withdrawing group is necessary for the reaction.

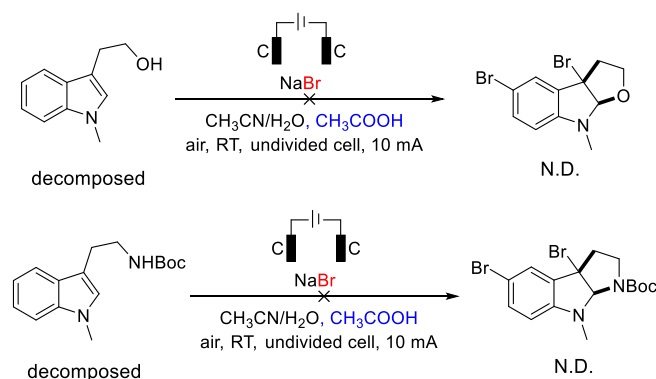

## 4. Experimental procedures and characterizations

### 4.1 Preparation of tryptamine/tryptophol substrates

All of the different tryptamine/tryptophol substrates were prepared according to the published procedures<sup>[1]</sup>.

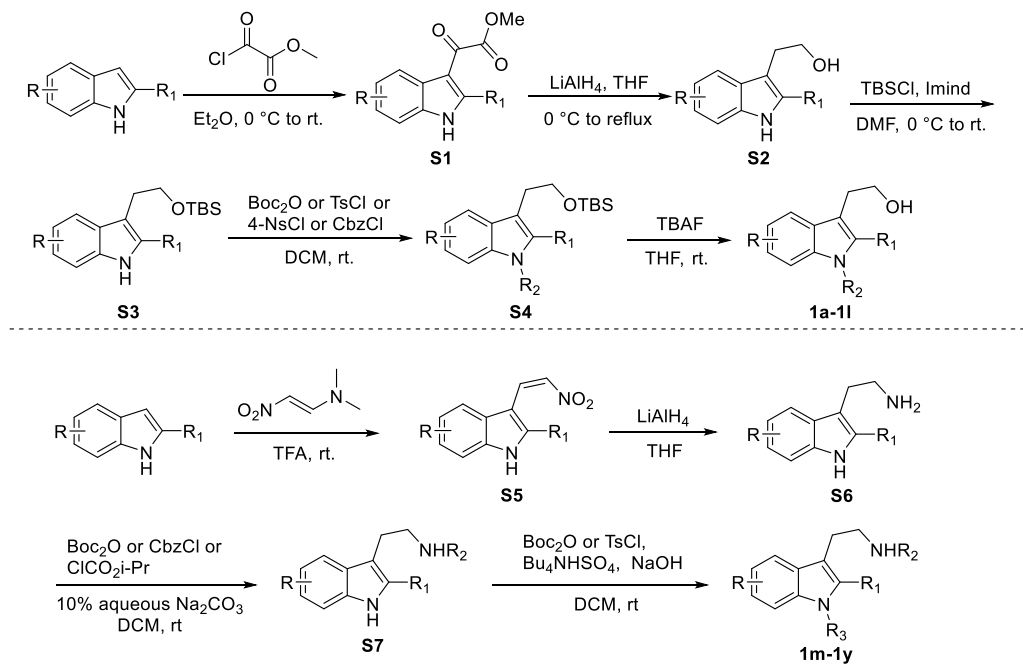

The physical datas for new substrate compounds were provided below:

#### tert-butyl 3-(2-((tert-butoxycarbonyl)amino)ethyl)-6-(trifluoromethyl)-1H-indole-1-carboxylate (**1y**)

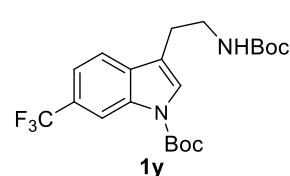

Light yellow oil, 64% yield; <sup>1</sup>H NMR (600 MHz, CDCl<sub>3</sub>) δ 8.47 (s, 1H), 7.63 (d, *J* = 8.2 Hz, 1H), 7.55 (s, 1H), 7.49 (d, *J* = 8.0 Hz, 1H), 4.66 (brs, 1H), 3.47 – 3.44 (m, 2H), 2.92 (t, *J* = 7.0 Hz, 2H), 1.68 (s, 9H), 1.44 (s, 9H) ppm. <sup>13</sup>C NMR (150 MHz, Chloroform-*d*) δ 155.9, 149.2, 134.7, 132.9, 126.5 (q, <sup>2</sup>*J*<sub>C-F</sub> = 31.4 Hz), 125.5, 124.8 (q, <sup>1</sup>*J*<sub>C-F</sub> = 271.6 Hz), 119.3, 119.2 (q, <sup>3</sup>*J*<sub>C-F</sub> = 3.0 Hz), 117.6, 112.8 (q, <sup>3</sup>*J*<sub>C-F</sub> = 4.4 Hz), 84.4, 79.4, 40.2, 28.3, 28.1, 25.5 ppm. <sup>19</sup>F NMR (565 MHz, Chloroform-*d*) δ -61.0 ppm. HRMS (ESI) *m/z*: [M + Na]<sup>+</sup> Calcd for C<sub>21</sub>H<sub>27</sub>O<sub>4</sub>N<sub>2</sub>F<sub>3</sub>Na 451.1815; Found 451.1807.

## 4.2 General Procedure for cyclic 3a, 5a-dibromoindolines

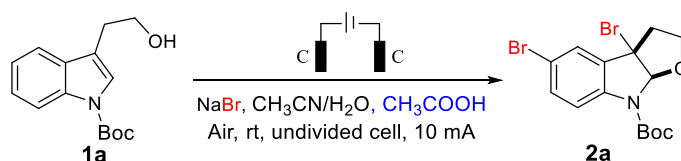

A mixture of **1a** (52.26 mg, 0.2 mmol), NaBr (51.4 mg, 0.5 mmol) and CH<sub>3</sub>CN (4 mL), H<sub>2</sub>O (30  $\mu$ L), CH<sub>3</sub>CO<sub>2</sub>H (20  $\mu$ L) were added in a 10 mL vial, then the vial was covered with the electrode holder at room temperature, the electrolysis was carried out using a constant current of 10.0 mA a carbon graphite anode and carbon graphite cathode (1.4  $\times$  0.8  $\times$  0.2 cm submerged in solution) with stirring. After completion as detected by TLC. The reaction mixture was diluted with EA. The organic phase was washed with brine, dried over Na<sub>2</sub>SO<sub>4</sub> and concentrated under reduced pressure, purified by flash column chromatography petroleum ether/ethyl acetate= 10/1 to give compound **2a** (71.3 mg, 85% yield).

### tert-butyl (3a*S*,8a*R*)-3a,5-dibromo-2,3,3a,8a-tetrahydro-8*H*-furo[2,3-*b*]indole-8-carboxylate (**2a**)

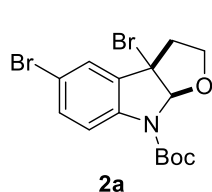

Light yellow oil, 4 h, 71.3 mg, 85% yield; <sup>1</sup>H NMR (600 MHz, CDCl<sub>3</sub>)  $\delta$  7.73 (brs, 1H), 7.51 (s, 1H), 7.38 (d,  $J$  = 8.2 Hz, 1H), 6.15 (brs, 1H), 4.01 (t,  $J$  = 8.2 Hz, 1H), 3.52 – 3.48 (m, 1H), 2.90 – 2.85 (m, 1H), 2.78 – 2.75 (m, 1H), 1.59 (s, 9H) ppm.

### (3a*S*,8a*R*)-3a,5-dibromo-8-tosyl-3,3a,8,8a-tetrahydro-2*H*-furo[2,3-*b*]indole (**2b**)

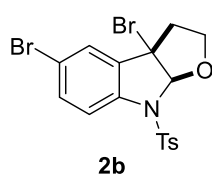

White solid, 4 h, 44.6 mg, 47% yield; <sup>1</sup>H NMR (600 MHz, CDCl<sub>3</sub>)  $\delta$  7.77 (d,  $J$  = 8.2 Hz, 2H), 7.45 (d,  $J$  = 1.8 Hz, 1H), 7.39 – 7.35 (m, 2H), 7.27 (d,  $J$  = 8.2 Hz, 2H), 6.21 (s, 1H), 4.03 – 4.00 (m, 1H), 3.46 – 3.42 (m, 1H), 2.84 – 2.79 (m, 1H), 2.71 – 2.68 (m, 1H), 2.38 (s, 3H) ppm; <sup>13</sup>C NMR (150 MHz, Chloroform-*d*)  $\delta$  144.7, 139.6, 135.2, 134.5, 133.5, 129.8, 128.3, 127.3, 117.2, 115.7, 103.5, 68.0, 60.1, 44.5, 21.6 ppm; HRMS (ESI)  $m/z$ : [M + Na]<sup>+</sup> Calcd for C<sub>17</sub>H<sub>15</sub>O<sub>3</sub>NBr<sub>2</sub>NaS 493.9031; Found 493.9027.

**benzyl (3a*S*,8a*R*)-3a,5-dibromo-2,3,3a,8a-tetrahydro-8*H*-furo[2,3-*b*]indole-8-carboxylate (2c)**

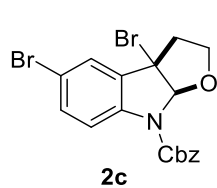

Colorless oil, 5 h, 44.5 mg, 49% yield;  $^1\text{H NMR}$  (600 MHz,  $\text{CDCl}_3$ )  $\delta$  7.77 (s, 1H), 7.53 (d,  $J = 2.0$  Hz, 1H), 7.50 – 7.28 (m, 6H), 6.26 (s, 1H), 5.41 – 5.24 (m, 2H), 4.04 (t,  $J = 8.2$  Hz, 1H), 3.54 – 3.50 (m, 1H), 2.92 – 2.85 (m, 1H), 2.79 – 2.76 (m, 1H) ppm;

$^{13}\text{C NMR}$  (150 MHz, Chloroform-*d*)  $\delta$  152.1, 140.5, 135.5, 133.5, 129.0, 128.6, 128.4, 127.9, 127.1, 116.4, 116.3, 100.8, 67.9, 67.8, 60.4, 44.8 ppm; **HRMS** (ESI)  $m/z$ :  $[\text{M} + \text{Na}]^+$  Calcd for  $\text{C}_{18}\text{H}_{15}\text{O}_3\text{NBr}_2\text{Na}$  473.9311; Found 473.9307.

**(3a*S*,8a*R*)-3a,5-dibromo-8-((4-nitrophenyl)sulfonyl)-3,3a,8,8a-tetrahydro-2*H*-furo[2,3-*b*]indole (2d)**

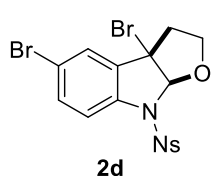

Light yellow oil, 4 h, 53.9 mg, 50% yield;  $^1\text{H NMR}$  (600 MHz,  $\text{CDCl}_3$ )  $\delta$  8.33 (d,  $J = 8.8$  Hz, 2H), 8.11 (d,  $J = 9.0$  Hz, 2H), 7.50 (d,  $J = 1.8$  Hz, 1H), 7.44 (dd,  $J = 8.8, 2.0$  Hz, 1H), 7.39 (d,  $J = 8.6$  Hz, 1H), 6.20 (s, 1H), 4.04 – 4.01 (m, 1H), 3.41 – 4.37 (m, 1H), 2.86 –

2.81 (m, 1H), 2.75 – 2.72 (m, 1H) ppm.  $^{13}\text{C NMR}$  (150 MHz, Chloroform-*d*)  $\delta$  133.5, 128.7, 128.5, 128.4, 128.2, 127.9, 116.4, 116.3, 100.8, 67.9, 67.8, 44.8, 1.0 ppm; **HRMS** (ESI)  $m/z$ :  $[\text{M} + \text{Na}]^+$  Calcd for  $\text{C}_{16}\text{H}_{12}\text{O}_5\text{N}_2\text{Br}_2\text{NaS}$  524.8726; Found 524.8707.

**tert-butyl (3a*S*,8a*R*)-3a,5-dibromo-8a-methyl-2,3,3a,8a-tetrahydro-8*H*-furo[2,3-*b*]indole-8-carboxylate (2e)**

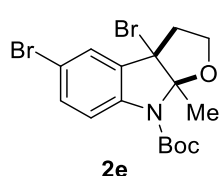

Light yellow oil, 4 h, 71.0 mg, 82% yield;  $^1\text{H NMR}$  (600 MHz,  $\text{CDCl}_3$ )  $\delta$  7.63 (d,  $J = 8.6$  Hz, 1H), 7.54 (d,  $J = 2.2$  Hz, 1H), 7.33 (dd,  $J = 8.8, 2.1$  Hz, 1H), 4.00 – 3.89 (m, 1H), 3.46 – 3.42 (m, 1H), 2.86 – 2.81 (m, 1H), 2.77 – 2.73 (m, 1H), 2.08 (s, 3H), 1.59 (s, 9H)

ppm;  $^{13}\text{C NMR}$  (150 MHz, Chloroform-*d*)  $\delta$  151.6, 141.0, 133.4, 133.1, 128.0, 116.8, 115.3, 104.2, 82.5, 70.0, 66.2, 46.2, 28.3, 26.3 ppm; **HRMS** (ESI)  $m/z$ :  $[\text{M} + \text{Na}]^+$  Calcd for  $\text{C}_{16}\text{H}_{19}\text{O}_3\text{NBr}_2\text{Na}$  453.9624; Found 453.9624.

**tert-butyl (3*aS*,8*aR*)-3*a*,5-dibromo-8*a*-phenyl-2,3,3*a*,8*a*-tetrahydro-8*H*-furo[2,3-*b*]indole-8-carboxylate (2f)**

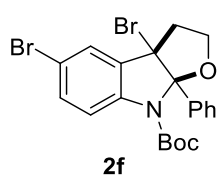

Yellow solid, 4 h, 90.9 mg, 92% yield;  $^1\text{H NMR}$  (600 MHz,  $\text{CDCl}_3$ )  $\delta$  7.87 (d,  $J = 8.8$  Hz, 1H), 7.63 (s, 1H), 7.54 (d,  $J = 2.0$  Hz, 1H), 7.48 – 7.30 (m, 4H), 7.15 (s, 1H), 4.26 – 4.15 (m, 1H), 3.70 – 3.66 (m, 1H), 2.92 – 2.87 (m, 1H), 2.82 – 2.76 (m, 1H), 1.14 (s, 9H) ppm;  $^{13}\text{C NMR}$  (150 MHz, Chloroform-*d*)  $\delta$  151.5, 141.6, 141.5, 133.2, 133.1, 128.27, 128.2, 127.7, 127.4, 126.8, 125.3, 116.2, 115.5, 107.0, 82.0, 71.0, 66.8, 46.8, 27.6 ppm; **HRMS** (ESI)  $m/z$ :  $[\text{M} + \text{Na}]^+$  Calcd for  $\text{C}_{21}\text{H}_{21}\text{O}_3\text{NBr}_2\text{Na}$  515.9780; Found 515.9776.

**tert-butyl (3*aS*,8*aR*)-3*a*,5-dibromo-4-fluoro-2,3,3*a*,8*a*-tetrahydro-8*H*-furo[2,3-*b*]indole-8-carboxylate (2g)**

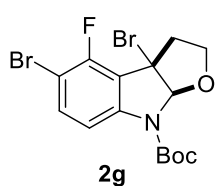

Light yellow oil, 4 h, 61.1 mg, 70% yield;  $^1\text{H NMR}$  (600 MHz,  $\text{CDCl}_3$ )  $\delta$  7.58 (brs, 1H), 7.47 (t,  $J = 7.8$  Hz, 1H), 6.15 (brs, 1H), 4.05 (t,  $J = 8.4$  Hz, 1H), 3.59 – 3.54 (m, 1H), 3.00 – 2.97 (m, 1H), 2.87 – 2.82 (m, 1H), 1.59 (s, 9H) ppm;  $^{13}\text{C NMR}$  (150 MHz, Chloroform-*d*)  $\delta$  154.9 (d,  $^1J_{\text{C-F}} = 250.0$  Hz), 151.2, 143.3, 135.4, 119.4, 111.9 (d,  $^3J_{\text{C-F}} = 4.5$  Hz), 102.2 (d,  $^2J_{\text{C-F}} = 17.5$  Hz), 101.7, 82.8, 68.1, 57.6, 42.8, 28.2 ppm;  $^{19}\text{F NMR}$  (565 MHz, Chloroform-*d*)  $\delta$  -110.8 ppm; **HRMS** (ESI)  $m/z$ :  $[\text{M} + \text{Na}]^+$  Calcd for  $\text{C}_{15}\text{H}_{16}\text{O}_3\text{NBr}_2\text{FNa}$  457.9373; Found 457.9370.

**tert-butyl (3*aS*,8*aR*)-3*a*-bromo-5-chloro-2,3,3*a*,8*a*-tetrahydro-8*H*-furo[2,3-*b*]indole-8-carboxylate (2h)**

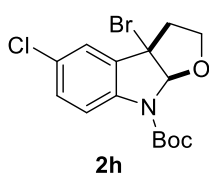

Colorless oil, 5 h, 56.2 mg, 75% yield;  $^1\text{H NMR}$  (600 MHz,  $\text{CDCl}_3$ )  $\delta$  7.78 (brs, 1H), 7.37 (d,  $J = 2.2$  Hz, 1H), 7.24 (d,  $J = 8.6$  Hz, 1H), 6.16 (brs, 1H), 4.01 (t,  $J = 8.3$  Hz, 1H), 3.68 – 3.39 (m, 1H), 2.91 – 2.85 (m, 1H), 2.78 – 2.75 (m, 1H), 1.59 (s, 9H) ppm;  $^{13}\text{C NMR}$  (150 MHz, Chloroform-*d*)  $\delta$  151.5, 140.5, 133.3, 130.4, 128.6, 124.8, 116.0, 101.0, 82.4, 67.7, 60.6, 44.8, 28.2 ppm; **HRMS** (ESI)  $m/z$ :  $[\text{M} + \text{Na}]^+$  Calcd for

C<sub>15</sub>H<sub>17</sub>O<sub>3</sub>NBrClNa 395.9972; Found 395.9972.

**(3a*S*,8a*R*)-3a-bromo-5-chloro-8-tosyl-2,3,3a,8a-tetrahydro-2*H*-furo[2,3-*b*]indole**

**(2i)**

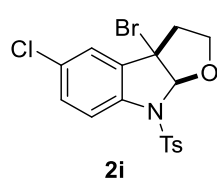

White solid, 5 h, 61.7 mg, 72% yield; <sup>1</sup>H NMR (600 MHz, CDCl<sub>3</sub>) δ 7.77 (d, *J* = 8.4 Hz, 2H), 7.42 (d, *J* = 8.7 Hz, 1H), 7.30 (d, *J* = 2.2 Hz, 1H), 7.27 (d, *J* = 8.2 Hz, 2H), 7.24 (dd, *J* = 8.6, 2.0 Hz, 1H), 6.21 (s, 1H), 4.04 – 4.01 (m, 1H), 3.47 – 3.42 (m, 1H), 2.85 – 2.80 (m, 1H), 2.71 – 2.68 (m, 1H), 2.38 (s, 3H) ppm; <sup>13</sup>C NMR (150 MHz, Chloroform-*d*) δ 144.7, 139.1, 135.2, 134.2, 130.7, 129.9, 129.8, 127.3, 125.3, 115.3, 103.5, 67.9, 60.2, 44.4, 21.6 ppm; HRMS (ESI) *m/z*: [M + Na]<sup>+</sup> Calcd for C<sub>17</sub>H<sub>15</sub>O<sub>3</sub>NBrClNaS 449.9537; Found 449.9532.

**tert-butyl (3a*S*,8a*R*)-3a,5-dibromo-6-fluoro-2,3,3a,8a-tetrahydro-8*H*-furo[2,3-*b*]indole-8-carboxylate (2j)**

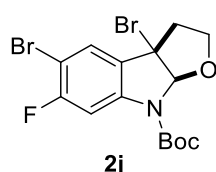

Light yellow oil, 8 h, 57.7 mg, 66% yield; <sup>1</sup>H NMR (600 MHz, CDCl<sub>3</sub>) δ 7.66 (brs, 1H), 7.28 (d, *J* = 6.8 Hz, 1H), 6.16 (brs, 1H), 4.00 (t, *J* = 8.2 Hz, 1H), 3.90 (t, *J* = 7.6 Hz, 1H), 3.48 – 3.43 (m, 1H), 2.34 – 2.27 (m, 1H), 2.06 (dd, *J* = 12.2, 4.6 Hz, 1H), 1.59 (s, 9H) ppm; <sup>13</sup>C NMR (150 MHz, Chloroform-*d*) δ 158.8 (d, <sup>1</sup>*J*<sub>C-F</sub> = 241.5 Hz), 151.9, 128.1, 103.5 (d, <sup>2</sup>*J*<sub>C-F</sub> = 30.0 Hz), 101.2 (d, <sup>2</sup>*J*<sub>C-F</sub> = 22.5 Hz), 94.0, 82.1, 66.4, 44.3, 33.8, 28.3 ppm. <sup>19</sup>F NMR (565 MHz, Chloroform-*d*) δ -106.7 ppm; HRMS (ESI) *m/z*: [M + Na]<sup>+</sup> Calcd for C<sub>15</sub>H<sub>16</sub>O<sub>3</sub>NBr<sub>2</sub>FNa 457.9373; Found 457.9363.

**tert-butyl (3a*S*,8a*R*)-3a,5-dibromo-6-chloro-2,3,3a,8a-tetrahydro-8*H*-furo[2,3-*b*]indole-8-carboxylate (2k)**

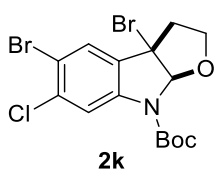

Light yellow oil, 7 h, 55.5 mg, 61% yield; <sup>1</sup>H NMR (600 MHz, CDCl<sub>3</sub>) δ 8.02 (brs, 1H), 7.61 (s, 1H), 6.15 (brs, 1H), 4.02 (t, *J* = 8.2 Hz, 1H), 3.52 – 3.48 (m, 1H), 2.89 – 2.84 (m, 1H), 2.76 – 2.73 (m, 1H), 1.59 (s, 9H) ppm; <sup>13</sup>C NMR (150 MHz, Chloroform-*d*) δ 151.2, 141.7, 136.4, 132.0, 129.3, 116.6, 115.8, 101.2, 82.8, 67.8, 59.7, 44.8, 28.2;



**HRMS** (ESI)  $m/z$ :  $[M + Na]^+$  Calcd for  $C_{15}H_{16}O_3NBr_2ClNa$  473.9078; Found 473.9069.

**tert-butyl 3a,5-dibromo-7-ethyl-2,3,3a,8a-tetrahydro-8H-furo[2,3-*b*]indole-8-carboxylate (2l)**

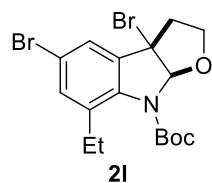

Colorless oil, 4 h, 68.5 mg, 77% yield;  $^1H$  NMR (600 MHz,  $CDCl_3$ )  $\delta$  7.38 (d,  $J = 2.0$  Hz, 1H), 7.32 (d,  $J = 2.0$  Hz, 1H), 6.15 (s, 1H), 3.99 – 3.93 (m, 1H), 3.46 – 3.42 (m, 1H), 2.89 – 2.81 (m, 1H), 2.78 – 2.68 (m, 3H), 1.56 (s, 9H), 1.18 (t,  $J = 7.6$  Hz, 3H) ppm.  $^{13}C$  NMR (150 MHz, Chloroform-*d*)  $\delta$  152.3, 139.0, 136.6, 136.4, 133.5, 124.6, 118.4, 102.9, 82.5, 67.8, 60.3, 43.2, 28.1, 25.7, 13.2 ppm; **HRMS** (ESI)  $m/z$ :  $[M + Na]^+$  Calcd for  $C_{17}H_{21}O_3NBr_2Na$  467.9780; Found 467.9760.

**di-tert-butyl (3a*S*,8a*S*)-3a,5-dibromo-2,3,3a,8a-tetrahydropyrrolo[2,3-*b*]indole-1,8-dicarboxylate (2n)**

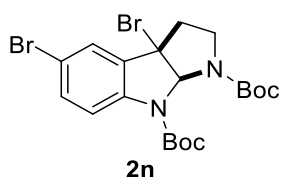

Light yellow oil, 4 h, 85.7 mg, 83% yield;  $^1H$  NMR (600 MHz,  $CDCl_3$ )  $\delta$  7.50 – 7.47 (m, 2H), 7.39 (dd,  $J = 8.6, 2.2$  Hz, 1H), 6.43 (s, 1H), 3.78 – 3.75 (m, 1H), 2.85 – 2.80 (m, 1H), 2.75 – 2.67 (m, 2H), 1.58 (s, 9H), 1.48 (s, 9H) ppm.

**benzyl (3a*S*,8a*S*)-3a,5-dibromo-8-tosyl-3,3a,8,8a-tetrahydropyrrolo[2,3-*b*]indole-1(2*H*)-carboxylate (2o)**

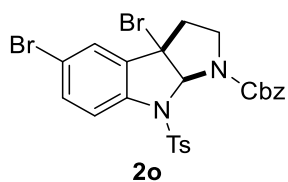

Colorless oil, 6 h, 77.1 mg, 64% yield;  $^1H$  NMR (600 MHz,  $CDCl_3$ )  $\delta$  7.73 – 7.28 (m, 10H), 7.17 (d,  $J = 7.3$  Hz, 2H), 6.26 (brs, 1H), 5.30 – 5.19 (m, 2H), 3.85 – 3.81 (m, 1H), 2.86 (s, 1H), 2.70 – 2.59 (m, 2H), 2.34 (s, 3H) ppm.  $^{13}C$  NMR (150 MHz, Chloroform-*d*)  $\delta$  153.7, 144.6, 140.3, 136.0, 135.5, 134.9, 133.7, 129.6, 128.5, 128.3, 127.8, 127.4, 119.3, 118.4, 87.0, 67.8, 60.6, 45.9, 42.3, 21.6 ppm. **HRMS** (ESI)  $m/z$ :  $[M + Na]^+$  Calcd for  $C_{25}H_{22}O_4N_2Br_2NaS$  626.9559; Found 626.9552.

**1-benzyl 8-(tert-butyl) (3*a*S,8*a*S)-3*a*,5-dibromo-2,3,3*a*,8*a*-tetrahydropyrrolo[2,3-*b*]indole-1,8-dicarboxylate (2*p*)**

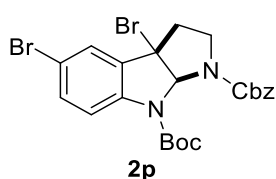

Colorless oil, 8 h, 79.8 mg, 72% yield;  $^1\text{H NMR}$  (600 MHz,  $\text{CDCl}_3$ )  $\delta$  7.53 (brs, 1H), 7.47 (d,  $J = 2.0$  Hz, 1H), 7.44 – 7.26 (m, 6H), 6.44 (s, 1H), 5.20 – 5.14 (m, 2H), 3.84 – 3.80 (m, 1H), 2.94– 2.89 (m, 1H), 2.79 – 2.70 (m, 2H), 1.53 (s, 9H) ppm;  $^{13}\text{C NMR}$  (150 MHz, Chloroform-*d*)  $\delta$  153.8, 151.7, 141.0, 136.3, 134.4, 133.4, 128.4, 128.1, 128.0, 126.8, 118.8, 116.3, 84.3, 82.6, 67.3, 60.8, 46.3, 41.1, 28.1 ppm. **HRMS** (ESI)  $m/z$ :  $[\text{M} + \text{Na}]^+$  Calcd for  $\text{C}_{23}\text{H}_{24}\text{O}_4\text{N}_2\text{Br}_2\text{Na}$  572.9995; Found 572.9978.

**di-tert-butyl (3*a*S,8*a*S)-3*a*,5-dibromo-8*a*-methyl-2,3,3*a*,8*a*-tetrahydropyrrolo[2,3-*b*]indole-1,8-dicarboxylate (2*q*)**

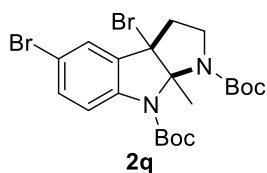

Yellow oil, 24 h, 78.4 mg, 74% yield;  $^1\text{H NMR}$  (600 MHz,  $\text{CDCl}_3$ )  $\delta$  7.60 (brs, 1H), 7.46 (d,  $J = 2.2$  Hz, 1H), 7.36 (dd,  $J = 8.8, 2.2$  Hz, 1H), 3.44 (t,  $J = 9.6$  Hz, 1H), 2.95 – 2.90 (m, 1H), 2.81 – 2.77 (m, 1H), 2.66 – 2.60 (m, 1H), 2.12 (s, 3H), 1.59 (s, 9H), 1.41 (s, 9H) ppm.  $^{13}\text{C NMR}$  (150 MHz, Chloroform-*d*)  $\delta$  141.3, 134.1, 132.9, 126.0, 119.9, 115.4, 88.5, 82.1, 80.5, 69.2, 45.7, 35.9, 28.4, 28.3, 24.0 ppm. **HRMS** (ESI)  $m/z$ :  $[\text{M} + \text{Na}]^+$  Calcd for  $\text{C}_{21}\text{H}_{28}\text{O}_4\text{N}_2\text{Br}_2\text{Na}$  553.0308; Found 553.0289.

**di-tert-butyl (3*a*S,8*a*S)-3*a*,5-dibromo-4-methyl-2,3,3*a*,8*a*-tetrahydropyrrolo[2,3-*b*]indole-1,8-dicarboxylate (2*r*)**

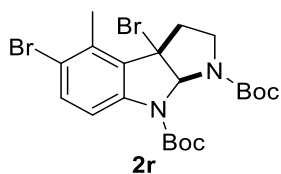

Colorless foam oil, 4 h, 76.6 mg, 72% yield;  $^1\text{H NMR}$  (600 MHz,  $\text{CDCl}_3$ )  $\delta$  7.48 (d,  $J = 8.7$  Hz, 1H), 7.40 (brs, 1H), 6.50 (s, 1H), 3.77 – 3.75 (m, 1H), 2.95 (dd,  $J = 12.4, 4.8$  Hz, 1H), 2.81 (td,  $J = 12.0, 4.8$  Hz, 1H), 2.68 – 2.62 (m, 1H), 2.51 (s, 3H), 1.57 (s, 9H), 1.49 (s, 9H) ppm.  $^{13}\text{C NMR}$  (150 MHz, Chloroform-*d*)  $\delta$  153.4, 151.8, 141.9, 134.7, 134.1, 130.8, 120.3, 116.0, 84.9, 82.4, 80.8, 63.0, 46.1, 40.8, 28.3, 28.2, 19.2 ppm. **HRMS** (ESI)  $m/z$ :  $[\text{M} + \text{Na}]^+$  Calcd for  $\text{C}_{21}\text{H}_{28}\text{O}_4\text{N}_2\text{Br}_2\text{Na}$  553.0308; Found 553.0289.

**di-tert-butyl (3a*S*,8a*S*)-3a,5-dibromo-4-fluoro-2,3,3a,8a-tetrahydropyrrolo[2,3-*b*]indole-1,8-dicarboxylate (2s)**

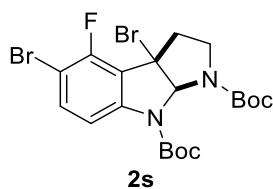

Yellow foam oil, 6 h, 77.4 mg, 72% yield;  $^1\text{H NMR}$  (600 MHz,  $\text{CDCl}_3$ )  $\delta$  7.48 – 7.45 (m, 1H), 7.36 (brs, 1H), 6.44 (s, 1H), 3.82 – 3.79 (m, 1H), 3.03 – 3.00 (m, 1H), 2.92 – 2.88 (m, 1H), 2.67 – 2.61 (m, 1H), 1.58 (s, 1H), 1.48 (s, 9H) ppm.  $^{13}\text{C NMR}$  (150 MHz, Chloroform-*d*)  $\delta$  154.7 (d,  $^1J_{\text{C-F}} = 250.5$  Hz), 153.2, 151.5, 143.5 (d,  $^3J_{\text{C-F}} = 4.5$  Hz), 135.2, 132.1 (d,  $^2J_{\text{C-F}} = 9.0$  Hz), 120.4, 113.7, 102.7, 85.0, 82.8, 81.0, 58.8, 46.5, 40.2, 28.3, 28.1 ppm.  $^{19}\text{F NMR}$  (565 MHz, Chloroform-*d*)  $\delta$  -111.2 ppm. **HRMS** (ESI)  $m/z$ :  $[\text{M} + \text{Na}]^+$  Calcd for  $\text{C}_{20}\text{H}_{25}\text{O}_4\text{N}_2\text{Br}_2\text{NaF}$  557.0057; Found 557.0053.

**di-tert-butyl (3a*S*,8a*S*)-3a,5-dibromo-6-methyl-2,3,3a,8a-tetrahydropyrrolo[2,3-*b*]indole-1,8-dicarboxylate (2t)**

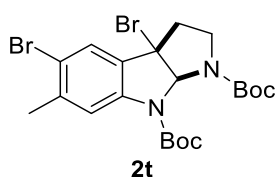

White solid, 5 h, 72.3 mg, 68% yield;  $^1\text{H NMR}$  (600 MHz,  $\text{CDCl}_3$ )  $\delta$  7.56 (br, 1H), 7.49 (s, 1H), 6.41 (s, 1H), 3.76 – 3.73 (m, 1H), 2.85 – 2.80 (m, 1H), 2.74 – 2.65 (m, 2H), 2.39 (s, 3H), 1.58 (s, 9H), 1.48 (s, 9H) ppm.  $^{13}\text{C NMR}$  (150 MHz, Chloroform-*d*)  $\delta$  153.2, 152.0, 141.5, 140.2, 132.1, 127.3, 119.2, 118.8, 84.4, 82.4, 80.8, 61.3, 46.2, 41.8, 28.3, 28.2, 23.6 ppm. **HRMS** (ESI)  $m/z$ :  $[\text{M} + \text{Na}]^+$  Calcd for  $\text{C}_{21}\text{H}_{28}\text{O}_4\text{N}_2\text{Br}_2\text{Na}$  553.0308; Found 553.0303.

**di-tert-butyl (3a*S*,8a*S*)-3a,5,6-tribromo-2,3,3a,8a-tetrahydropyrrolo[2,3-*b*]indole-1,8-dicarboxylate (2u)**

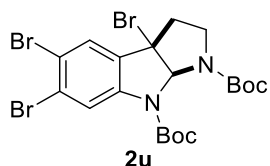

White foam oil, 10 h, 70.4 mg, 61% yield;  $^1\text{H NMR}$  (600 MHz,  $\text{CDCl}_3$ )  $\delta$  7.97 (brs, 1H), 7.57 (s, 1H), 6.42 (s, 1H), 3.80 – 3.76 (m, 1H), 2.86 – 2.82 (m, 1H), 2.73 – 2.65 (m, 2H), 1.59 (s, 9H), 1.48 (s, 9H) ppm.  $^{13}\text{C NMR}$  (150 MHz, Chloroform-*d*)

$\delta$  153.1, 151.5, 142.0, 133.7, 128.4, 126.5, 121.9, 118.5, 84.5, 83.0, 81.0, 60.4, 46.2, 41.9, 28.3, 28.1 ppm. **HRMS** (ESI)  $m/z$ :  $[M + Na]^+$  Calcd for  $C_{20}H_{25}O_4N_2Br_3Na$  616.9257; Found 616.9242.

**di-tert-butyl (3a*S*,8a*S*)-3a,5-dibromo-7-methyl-2,3,3a,8a-tetrahydropyrrolo[2,3-*b*]indole-1,8-dicarboxylate (2v)**

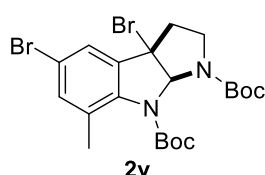

White foam oil, 8 h, 72.8 mg, 68% yield;  $^1H$  NMR (600 MHz,  $CDCl_3$ )  $\delta$  7.31 (d,  $J = 2.0$  Hz, 1H), 7.28 (d,  $J = 2.0$  Hz, 1H), 6.22 (brs, 1H), 3.58 – 3.55 (m, 1H), 2.82 – 2.74 (m, 2H), 2.72 – 2.66 (m, 1H), 2.28 (s, 3H), 1.53 (s, 9H), 1.49 (s, 9H) ppm.

$^{13}C$  NMR (150 MHz, Chloroform-*d*)  $\delta$  153.3, 140.9, 137.2, 135.0, 133.0, 123.4, 118.6, 86.2, 82.3, 80.7, 61.1, 45.5, 37.8, 28.5, 28.1, 19.2 ppm. **HRMS** (ESI)  $m/z$ :  $[M + Na]^+$  Calcd for  $C_{21}H_{28}O_4N_2Br_2Na$  553.0308; Found 553.0303.

**di-tert-butyl (3a*S*,8a*S*)-3a,5-dibromo-8a-phenyl-2,3,3a,8a-tetrahydropyrrolo[2,3-*b*]indole-1,8-dicarboxylate (2w)**

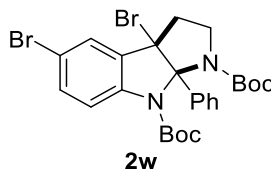

White foam oil, 10 h, 80.0 mg, 67% yield;  $^1H$  NMR (600 MHz,  $CDCl_3$ )  $\delta$  7.98 (d,  $J = 8.8$  Hz, 1H), 7.66 (d,  $J = 6.1$  Hz, 1H), 7.48 (d,  $J = 2.1$  Hz, 1H), 7.41 (dd,  $J = 8.8, 2.0$  Hz, 1H), 7.35 – 7.32 (m, 3H), 7.15 (d,  $J = 6.6$  Hz, 1H), 3.71 – 3.62 (m, 1H),

3.25 – 3.20 (m, 1H), 2.77 – 2.74 (m, 1H), 2.42 – 2.36 (m, 1H), 1.36 (s, 9H), 1.24 (s, 9H) ppm.  $^{13}C$  NMR (150 MHz, Chloroform-*d*)  $\delta$  151.8, 151.6, 141.9, 135.8, 133.6, 133.0, 132.8, 128.1, 126.8, 126.1, 125.5, 125.4, 119.5, 115.1, 92.5, 81.6, 80.2, 71.9, 47.1, 35.4, 28.2, 27.5 ppm. **HRMS** (ESI)  $m/z$ :  $[M + Na]^+$  Calcd for  $C_{26}H_{30}O_4N_2Br_2Na$  615.0464; Found 615.0449.

**di-tert-butyl**

**(3a*S*,8a*S*)-3a-bromo-6-(trifluoromethyl)-2,3,3a,8a-tetrahydro-pyrrolo[2,3-*b*]indole-1,8-dicarboxylate (3y)**

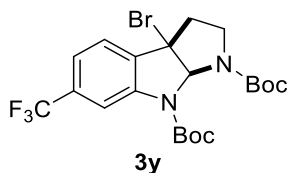

White foam oil, 3 h, 37.6 mg, 37% yield;  $^1H$  NMR (600 MHz, Chloroform-*d*)  $\delta$  7.92 (brs, 1H), 7.47 (d,  $J = 8.0$  Hz,

1H), 7.36 (d,  $J = 8.0$  Hz, 1H), 6.48 (s, 1H), 3.78 (dd,  $J = 10.8, 7.2$  Hz, 1H), 2.84 – 2.73 (m, 3H), 1.60 (s, 9H), 1.49 (s, 9H) ppm.  **$^{13}\text{C}$  NMR** (150 MHz, Chloroform-*d*)  $\delta$  153.2, 151.6, 142.3, 136.2, 132.4 (q,  $^2J_{\text{C-F}} = 33.0$  Hz), 124.3, 123.8 (q,  $^1J_{\text{C-F}} = 271.6$  Hz), 120.9, 114.4, 84.2, 82.8, 81.0, 60.7, 46.1, 41.5, 28.3, 28.1 ppm.  **$^{19}\text{F}$  NMR** (565 MHz, Chloroform-*d*)  $\delta$  -62.7 ppm. **HRMS** (ESI)  $m/z$ :  $[\text{M} + \text{Na}]^+$  Calcd for  $\text{C}_{21}\text{H}_{26}\text{O}_4\text{N}_2\text{F}_3\text{BrNa}$  529.0920; Found 529.0911.

## 5. Scale-up experiments

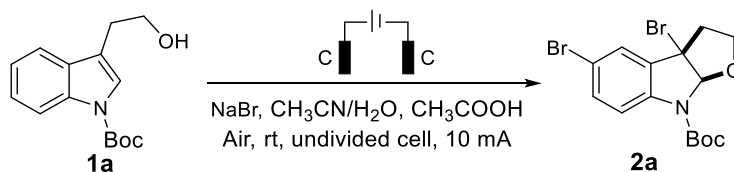

A mixture of **1a** (261.32 mg, 1.0 mmol), NaBr (257.23 mg, 2.5 mmol) and CH<sub>3</sub>CN (8 mL), H<sub>2</sub>O (150  $\mu$ L), CH<sub>3</sub>CO<sub>2</sub>H (100  $\mu$ L) were added in a 10 mL vial, then the vial was covered with the electrode holder at room temperature, the electrolysis was carried out using a constant current of 10.0 mA a carbon graphite anode and carbon graphite cathode (1.4  $\times$  0.8  $\times$  0.2 cm submerged in solution) with stirring. After completion as detected by TLC. The reaction mixture was diluted with EA. The organic phase was washed with brine, dried over Na<sub>2</sub>SO<sub>4</sub> and concentrated under reduced pressure, purified by flash column chromatography petroleum ether/ethyl acetate= 10/1 to give compound **2a** (295.0 mg, 70% yield).

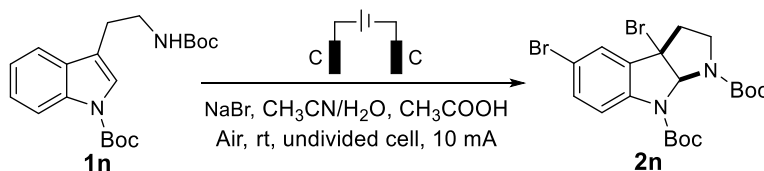

A mixture of **1a** (360.45 mg, 1.0 mmol), NaBr (257.23 mg, 2.5 mmol) and CH<sub>3</sub>CN (8 mL), H<sub>2</sub>O (150  $\mu$ L), CH<sub>3</sub>CO<sub>2</sub>H (100  $\mu$ L) were added in a 10 mL vial, then the vial was covered with the electrode holder at room temperature, the electrolysis was carried out using a constant current of 10.0 mA a carbon graphite anode and carbon graphite cathode (1.4  $\times$  0.8  $\times$  0.2 cm submerged in solution) with stirring. After completion as detected by TLC. The reaction mixture was diluted with EA. The organic phase was washed with brine, dried over Na<sub>2</sub>SO<sub>4</sub> and concentrated under reduced pressure, purified by flash column chromatography petroleum ether/ethyl acetate= 10/1 to give compound **2a** (379.8 mg, 73% yield).

## 6. Synthetic transformations and applications

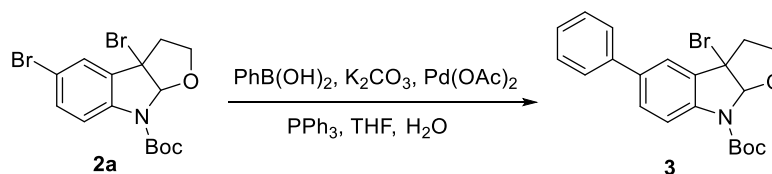

To a solution of **2a** (83.82 mg, 0.2 mmol) in THF (4 mL) were sequentially added  $\text{PhB(OH)}_2$  (48.78 mg, 0.4 mmol),  $\text{K}_2\text{CO}_3$  (30.41 mg, 0.22 mmol),  $\text{Pd(OAc)}_2$  (13.46 mg, 0.06 mmol),  $\text{PPh}_3$  (15.72 mg, 0.06 mmol) and  $\text{H}_2\text{O}$  (54  $\mu\text{L}$ , 3.0 mmol) under argon atmosphere, the mixture was stirred at room temperature, the reaction was completed after for 12 h. The solution was washed with water and the aqueous layer was extracted with DCM, the organic phase was washed with brine, dried over  $\text{Na}_2\text{SO}_4$  and concentrated under reduced pressure, the crude product was purified by flash column chromatography petroleum ether/ethyl acetate to afford the product **3** as colorless oil (60.2 mg, 72% yield).

**tert-butyl (3a*S*,8a*R*)-3a-bromo-5-phenyl-2,3,3a,8a-tetrahydro-8*H*-furo[2,3-*b*]indole-8-carboxylate (3)**

$^1\text{H NMR}$  (600 MHz,  $\text{CDCl}_3$ )  $\delta$  7.89 (brs, 1H), 7.63 (s, 1H), 7.57 (d,  $J = 7.6$  Hz, 2H), 7.53 (d,  $J = 8.2$  Hz, 1H), 7.44 (t,  $J = 7.6$  Hz, 2H), 7.34 (t,  $J = 7.4$  Hz, 1H), 6.22 (brs, 1H), 4.03 (t,  $J = 8.4$  Hz, 1H), 3.57 – 3.53 (m, 1H), 2.96 – 2.91 (m, 1H), 2.87 – 2.84 (m, 1H), 1.62 (s, 9H) ppm.  $^{13}\text{C NMR}$  (150 MHz, Chloroform-*d*)  $\delta$  140.2, 137.0, 129.4, 128.8, 127.2, 126.8, 115.1, 101.1, 67.8, 45.1, 28.3 ppm. **HRMS** (ESI)  $m/z$ :  $[\text{M} + \text{Na}]^+$  Calcd for  $\text{C}_{21}\text{H}_{22}\text{O}_3\text{NBrNa}$  438.0675; Found 438.0672.

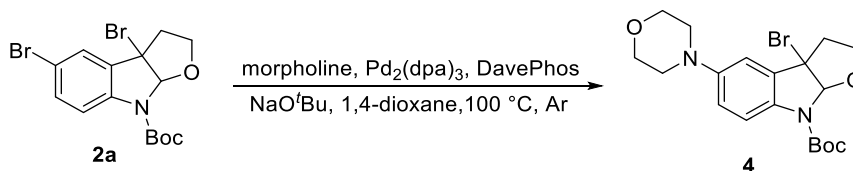

A mixture of **2a** (83.82 mg, 0.2 mmol), DavePhos (11.8 mg, 0.03 mmol),  $\text{Pd}_2(\text{dba})_3$  (18.3 mg, 0.02 mmol),  $\text{NaO}^t\text{Bu}$  (38.4 mg, 0.4 mmol) and morpholine (52.4  $\mu\text{L}$ , 0.6 mmol) were dissolved in 1,4-dioxane (2 mL) under argon atmosphere, then the mixture was stirred at 100  $^\circ\text{C}$  and the reaction was completed as monitored by

TLC. The solution was washed with water and the aqueous layer was extracted with DCM, the organic phase was washed with brine, dried over Na<sub>2</sub>SO<sub>4</sub> and concentrated under reduced pressure, purified by flash column chromatography petroleum ether/ethyl acetate= 2/1 to give **4** as a yellow oil (25.0 mg, 29% yield).

**tert-butyl**

**3a-bromo-5-morpholino-2,3,3a,8a-tetrahydro-8H-furo[2,3-b]indole-8-carboxylate (4)**

<sup>1</sup>H NMR (600 MHz, CDCl<sub>3</sub>) δ 7.71 (brs, 1H), 6.80 (s, 2H), 6.16 (br, 1H), 3.98 (t, *J* = 8.0 Hz, 1H), 3.91 – 3.82 (m, 4H), 3.48 – 3.44 (m, 1H), 3.13 – 3.06 (m, 4H), 2.37 – 2.24 (m, 1H), 2.10 – 2.08 (m, 1H), 1.58 (s, 9H) ppm. <sup>13</sup>C NMR (150 MHz, Chloroform-*d*) δ 147.7, 136.7, 132.1, 128.4, 116.0, 114.8, 112.8, 93.5, 81.0, 66.9, 66.3, 50.5, 45.3, 33.7, 28.4 ppm. HRMS (ESI) *m/z*: [M + Na]<sup>+</sup> Calcd for C<sub>19</sub>H<sub>26</sub>O<sub>4</sub>N<sub>2</sub>Br 425.1070; Found 425.1073.

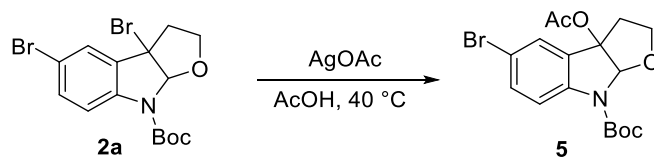

To a solution of **2a** (83.82 mg, 0.2 mmol) and AgOAc (36.72 mg, 0.22 mmol) in AcOH was heated to 40 °C in the dark, the reaction was completed as monitored by TLC, after 4 h. The reaction was extracted with EA, the organic phase was washed with brine and dried over Na<sub>2</sub>SO<sub>4</sub>, purified by flash column chromatography to afford the product **5** as a white foam oil (66.3 mg, 83% yield).

**tert-butyl 3a-acetoxy-5-bromo-2,3,3a,8a-tetrahydro-8H-furo[2,3-b]indole-8-carboxylate (5)**

<sup>1</sup>H NMR (600 MHz, CDCl<sub>3</sub>) δ 7.77 (brs, 1H), 7.61 (d, *J* = 2.0 Hz, 1H), 7.41 (d, *J* = 8.0 Hz, 1H), 6.06 (brs, 1H), 4.10 (t, *J* = 8.8 Hz, 1H), 3.57 – 3.53 (m, 1H), 2.68 – 2.57 (m, 2H), 2.06 (s, 3H), 1.58 (s, 9H) ppm. <sup>13</sup>C NMR (150 MHz, Chloroform-*d*) δ 169.8, 151.8, 140.3, 133.5, 130.5, 128.1, 116.3, 115.3, 96.7, 90.7, 82.1, 67.0, 39.7, 28.3, 21.3 ppm. HRMS (ESI) *m/z*: [M + Na]<sup>+</sup> Calcd for C<sub>17</sub>H<sub>20</sub>O<sub>5</sub>NBrNa 420.0417; Found 420.0402.



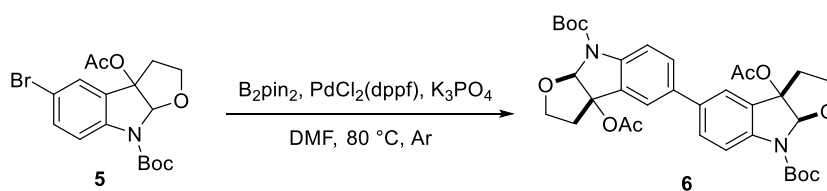

A mixture of **5** (39.83 mg, 0.1 mmol),  $K_3PO_4$  (63.68 mg, 0.3 mmol),  $PdCl_2(dppf)$  (7.26 mg, 0.01 mmol), and  $B_2Pin_2$  (27.93 mg, 0.11 mmol) were dissolved in DMF (3 mL) under argon atmosphere, the mixture was heated to 80 °C and the reaction was monitored by TLC. The mixture was extracted with EA, the organic phase was washed with brine, dried over  $Na_2SO_4$ , purified by flash column chromatography petroleum ether/ethyl acetate= 4/1 to give compound **6** as a colorless oil (29.5 mg, 46% yield).

**di-tert-butyl (3a*S*,3'a*S*,8a*R*,8'a*R*)-3a,3'a-diacetoxy-2,2',3,3a,3',3'a,8a,8'a octahydro-8*H*,8'*H*-[5,5'-bifuro[2,3-*b*]indole]-8,8'-dicarboxylate (**6**)**

$^1H$  NMR (600 MHz,  $CDCl_3$ )  $\delta$  7.92 (brs, 2H), 7.67 (s, 2H), 7.52 (d,  $J = 8.0$  Hz, 2H), 6.12 (brs, 2H), 4.12 (t,  $J = 8.4$  Hz, 2H), 3.63 – 3.58 (m, 2H), 2.78 – 2.73 (m, 2H), 2.68 – 2.63 (m, 2H), 2.07 (s, 3H), 2.06 (s, 3H), 1.61 (s, 18H) ppm.  $^{13}C$  NMR (150 MHz, Chloroform-*d*)  $\delta$  169.8, 152.0, 143.4, 138.9, 135.6, 129.2, 123.2, 115.0, 96.8, 91.3, 81.7, 67.0, 39.7, 28.3, 21.4 ppm. HRMS (ESI)  $m/z$ :  $[M + Na]^+$  Calcd for  $C_{34}H_{40}O_{10}N_2Na$  659.2575; Found 659.2574.

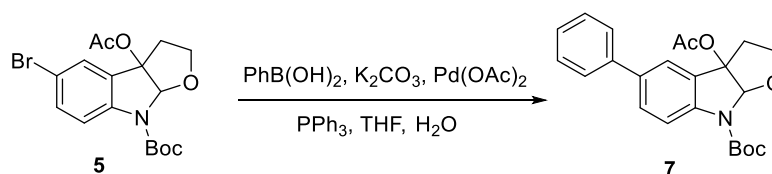

To a solution of **5** (79.65 mg, 0.2 mmol) in THF (4 mL) were sequentially added  $PhB(OH)_2$  (48.78 mg, 0.4 mmol),  $K_2CO_3$  (30.41 mg, 0.22 mmol),  $Pd(OAc)_2$  (13.46 mg, 0.06 mmol),  $PPh_3$  (15.72 mg, 0.06 mmol) and  $H_2O$  (54  $\mu$ L, 3.0 mmol) under argon atmosphere, the mixture was stirred at room temperature, the reaction was completed after for 12 h. The solution was washed with water and the aqueous layer was extracted with DCM, the organic phase was washed with brine, dried over

Na<sub>2</sub>SO<sub>4</sub> and concentrated under reduced pressure, the crude product was purified by silica gel column chromatography on silica gel to afford the product **7** as a colorless oil (44.3 mg, 56% yield).

**tert-butyl 3a-acetoxy-5-phenyl-2,3,3a,8a-tetrahydro-8H-furo[2,3-b]indole-8-carboxylate (7)**

<sup>1</sup>H NMR (600 MHz, CDCl<sub>3</sub>) δ 7.94 (brs, 1H), 7.75 (s, 1H), 7.61 – 7.51 (m, 3H), 7.42 (t, *J* = 7.7 Hz, 2H), 7.31 (t, *J* = 7.4 Hz, 1H), 6.12 (brs, 1H), 4.12 (t, *J* = 8.5 Hz, 1H), 3.63 – 3.58 (m, 1H), 2.78 – 2.75 (m, 1H), 2.67 – 2.62 (m, 1H), 2.05 (s, 3H), 1.61 (s, 9H) ppm. <sup>13</sup>C NMR (150 MHz, Chloroform-*d*) δ 169.8, 151.9, 143.5, 140.4, 136.3, 129.5, 128.7, 127.0, 126.7, 123.7, 114.9, 96.8, 91.3, 81.7, 67.1, 39.6, 28.3, 21.3 ppm. HRMS (ESI) *m/z*: [M + Na]<sup>+</sup> Calcd for C<sub>23</sub>H<sub>25</sub>O<sub>5</sub>NNa 418.1625; Found 418.1614.

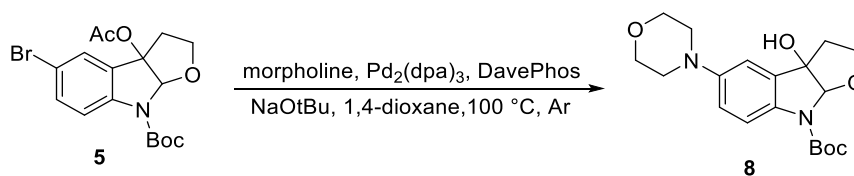

A mixture of **5** (79.65 mg, 0.2 mmol), DavePhos (11.8 mg, 0.03 mmol), Pd<sub>2</sub>(dba)<sub>3</sub> (18.3 mg, 0.02 mmol), NaO<sup>*t*</sup>Bu (38.4 mg, 0.4 mmol) and morpholine (52.4 μL, 0.6 mmol) were dissolved in 1,4-dioxane (2 mL) under argon atmosphere, then the mixture was stirred at 100 °C and the reaction was completed as monitored by TLC. The solution was washed with water and the aqueous layer was extracted with DCM, the organic phase was washed with brine, dried over Na<sub>2</sub>SO<sub>4</sub> and concentrated under reduced pressure, purified by flash column chromatography petroleum ether/ethyl acetate= 2/1 to give compound **8** as a yellow oil (50.0 mg, 69% yield).

**tert-butyl 3a-hydroxy-5-morpholino-2,3,3a,8a-tetrahydro-8H-furo[2,3-b]indole-8-carboxylate (8)**

<sup>1</sup>H NMR (600 MHz, CDCl<sub>3</sub>) δ 7.73 (brs, 1H), 6.93 (s, 1H), 6.87 (d, *J* = 8.8 Hz, 1H), 5.70 (s, 1H), 4.03 (t, *J* = 8.4 Hz, 1H), 3.84 – 3.78 (m, 4H), 3.56 – 3.50 (m, 1H), 3.47 (s, 1H), 3.06 – 2.98 (m, 4H), 2.51 – 2.46 (m, 1H), 2.34 – 2.32 (m, 1H), 1.56 (s, 9H) ppm. <sup>13</sup>C NMR (150 MHz, CDCl<sub>3</sub>) δ 152.3, 147.8, 136.8, 132.4, 118.7, 115.4, 111.7, 98.6, 86.7, 81.4, 67.7, 66.7, 50.4, 40.4, 28.3 ppm. HRMS (ESI) *m/z*: [M + Na]<sup>+</sup> Calcd

for C<sub>19</sub>H<sub>26</sub>O<sub>5</sub>N<sub>2</sub>Na 385.1733; Found 385.1728.

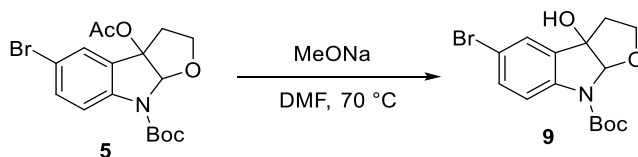

To a solution of **5** (79.65 mg, 0.2 mmol) in dry DMF (4 mL) and was added MeONa in MeOH (4.0 M, 0.8 mL), the reaction was heated to 70 °C under argon atmosphere, the reaction was completed as monitored by TLC, after 1 h. The reaction was extracted with EA, the organic phase was washed with brine and dried over Na<sub>2</sub>SO<sub>4</sub>, purified by column chromatography on silica gel to afford the product **9** as a white foam oil (55.8 mg, 78% yield).

**tert-butyl 5-bromo-3a-hydroxy-2,3,3a,8a-tetrahydro-8H-furo[2,3-b]indole-8-carboxylate (9)**

<sup>1</sup>H NMR (600 MHz, CDCl<sub>3</sub>) δ 7.67 (brs, 1H), 7.50 (s, 1H), 7.40 (d, *J* = 8.6 Hz, 1H), 5.73 (s, 1H), 4.04 (t, *J* = 8.4 Hz, 1H), 3.56 – 3.49 (m, 1H), 2.98 (s, 1H), 2.52 – 2.46 (m, 1H), 2.35 – 2.32 (m, 1H), 1.56 (s, 9H) ppm. <sup>13</sup>C NMR (150 MHz, Chloroform-*d*) δ 152.1, 142.0, 133.7, 133.2, 127.1, 116.4, 115.5, 98.5, 86.3, 82.2, 67.7, 40.7, 28.3 ppm. HRMS (ESI) *m/z*: [M + Na]<sup>+</sup> Calcd for C<sub>15</sub>H<sub>18</sub>O<sub>4</sub>NBrNa 378.0311; Found 378.0308.

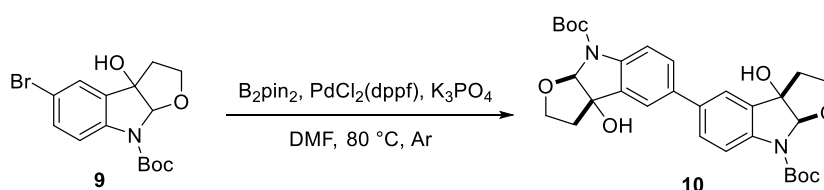

A mixture of **9** (71.24 mg, 0.2 mmol), K<sub>3</sub>PO<sub>4</sub> (127.4 mg, 0.6 mmol), PdCl<sub>2</sub>(dppf) (14.52 mg, 0.02 mmol), and B<sub>2</sub>Pin<sub>2</sub> (55.86 mg, 0.22 mmol) were dissolved in DMF (3 mL) under argon atmosphere, the mixture was heated to 80 °C and the reaction was monitored by TLC. The mixture was extracted with EA, the organic phase was washed with brine, dried over Na<sub>2</sub>SO<sub>4</sub>, purified by flash column chromatography petroleum ether/ethyl acetate= 3/1 to give compound **10** as a colorless oil (45.6 mg, 41% yield).

**di-tert-butyl (3aS,3'aS,8aR,8'aR)-3a,3'a-dihydroxy-2,2',3,3a,3',3'a,8a,8'a**

**octahy-dro-8*H*,8'*H*-[5,5'-bifuro[2,3-*b*]indole]-8,8'-dicarboxylate (10)**

<sup>1</sup>H NMR (600 MHz, CDCl<sub>3</sub>) δ 7.82 (brs, 2H), 7.59 (d, *J* = 9.2 Hz, 2H), 7.50 (d, *J* = 8.4 Hz, 2H), 5.81 (brs, 2H), 4.10 – 4.08 (m, 2H), 3.61 – 3.56 (m, 2H), 2.63 (br, 2H), 2.59 – 2.53 (m, 2H), 2.45 – 2.40 (m, 2H), 1.60 (s, 18H) ppm. <sup>13</sup>C NMR (150 MHz, Chloroform-*d*) δ 153.4, 151.5, 142.2, 133.4, 132.0, 126.1, 117.2, 115.1, 82.5, 80.6, 78.8, 60.5, 45.1, 28.4, 28.3 ppm. HRMS (ESI) *m/z*: [M + Na]<sup>+</sup> Calcd for C<sub>30</sub>H<sub>36</sub>O<sub>8</sub>N<sub>2</sub>Na 575.2364; Found 575.2345.

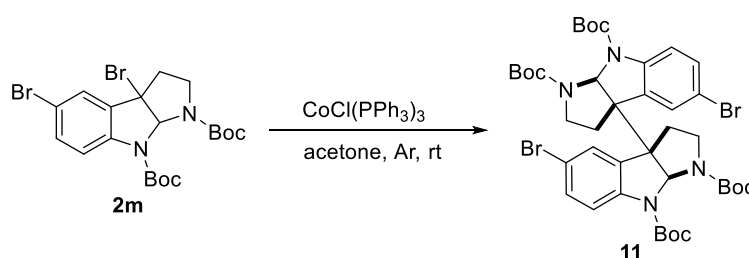

Under an argon atmosphere, freshly prepared CoCl(PPh<sub>3</sub>)<sub>3</sub> (105.75 mg, 0.12 mmol) was added quickly to a degassed (nitrogen bubbling for 10 min) solution of **2m** (51.82 mg, 0.1 mmol) in dry acetone (1.0 mL). After 15 min, the reaction mixture was diluted with DCM and quenched with saturated NH<sub>4</sub>Cl solution. The organic layer was separated and the aqueous layer was extracted with DCM. the organic phase was washed with brine, dried over Na<sub>2</sub>SO<sub>4</sub>, purified by flash column chromatography petroleum ether/ethyl acetate= 10/1 to give **11** as a Yellow oil (25.6 mg, 29% yield).

**tetra-tert-butyl (3*aR*,3'*aR*,8*aS*,8'*aS*)-5,5'-dibromo-2,2',3,3'-tetrahydro-1*H*,1'*H*-[3*a*,3'*a*-bipyrrolo[2,3-*b*]indole]-1,1',8,8'-(8*aH*,8'*aH*)-tetracarboxylate (11)**

<sup>1</sup>H NMR (600 MHz, CDCl<sub>3</sub>) δ 7.49 (dd, *J* = 8.0, 1.2 Hz, 2H), 7.32 (dd, *J* = 7.6, 1.2 Hz, 2H), 7.07 (t, *J* = 7.8 Hz, 2H), 6.19 (s, 2H), 3.59 – 3.53 (m, 2H), 2.81 – 2.74 (m, 4H), 2.74 – 2.66 (m, 2H), 1.54 (s, 18H), 1.51 (s, 18H) ppm. <sup>13</sup>C NMR (150 MHz, Chloroform-*d*) δ 153.4, 151.5, 142.2, 133.4, 132.0, 126.1, 117.2, 115.1, 82.5, 80.6, 78.8, 60.5, 45.1, 34.7, 28.4, 28.3 ppm. HRMS (ESI) *m/z*: [M + Na]<sup>+</sup> Calcd for C<sub>40</sub>H<sub>52</sub>N<sub>4</sub>Br<sub>2</sub>O<sub>8</sub>Na 897.2044; Found 897.2028.

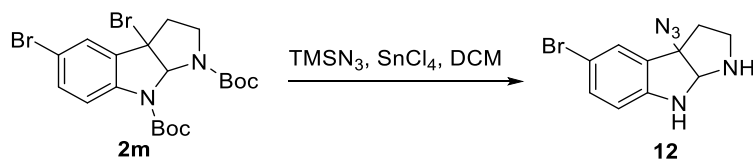

Under an argon atmosphere,  $\text{SnCl}_4$  (11.3  $\mu\text{L}$ , 1.0 mmol) was added to a solution of bromide **2m** (51.82 mg, 0.1 mmol) and trimethylsilylazide (0.26 mL, 1.0 mmol) in dry DCM (1.0 mL) by syringe at room temperature. After stirring at room temperature for 12h, the reaction mixture was cooled to 0  $^\circ\text{C}$  and quenched by saturated  $\text{NaHCO}_3$  solution. The reaction mixture was diluted with water and extracted with DCM. The combined organic layers were dried over anhydrous  $\text{Na}_2\text{SO}_4$ , the solvent was concentrated under reduced pressure, purified by flash column chromatography petroleum ether/ethyl acetate= 10/1 to give **12** as a yellow solid (9.9 mg, 35% yield).

### 3a-azido-5-bromo-1,2,3,3a,8,8a-hexahydropyrrolo[2,3-b]indole (**12**)

$^1\text{H NMR}$  (600 MHz,  $\text{CDCl}_3$ )  $\delta$  7.33 (d,  $J = 2.0$  Hz, 1H), 7.25 (dd,  $J = 8.4, 2.0$  Hz, 1H), 6.52 (d,  $J = 8.6$  Hz, 1H), 5.14 (s, 1H), 3.17 – 3.14 (m, 1H), 2.86 – 2.81 (m, 1H), 2.26 – 2.23 (m, 1H), 2.18 – 2.13 (m, 1H) ppm.  $^{13}\text{C NMR}$  (150 MHz, Chloroform-*d*)  $\delta$  149.2, 133.1, 129.1, 127.2, 111.2, 110.7, 84.5, 79.0, 45.8, 40.7 ppm. **HRMS** (ESI)  $m/z$ :  $[\text{M} + \text{Na}]^+$  Calcd for  $\text{C}_{10}\text{H}_{11}\text{N}_5\text{Br}$  280.0192; Found 280.0194.

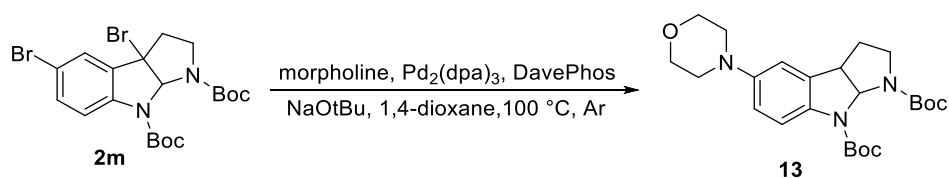

A mixture of **2m** (51.82 mg, 0.1 mmol), DavePhos (11.8 mg, 0.03 mmol),  $\text{Pd}_2(\text{dba})_3$  (18.3 mg, 0.02 mmol),  $\text{NaO}^t\text{Bu}$  (38.4 mg, 0.4 mmol) and morpholine (52.4  $\mu\text{L}$ , 0.6 mmol) were dissolved in 1,4-dioxane (2 mL) under argon atmosphere, then the mixture was stirred at 100  $^\circ\text{C}$  and the reaction was completed as monitored by TLC. The solution was washed with water and the aqueous layer was extracted with DCM, the organic phase was washed with brine, dried over  $\text{Na}_2\text{SO}_4$  and concentrated under reduced pressure, purified by flash column chromatography petroleum ether/ethyl acetate= 10/1 to give compound **13** as a yellow oil (22.4 mg, 50% yield).

### di-tert-butyl

#### 5-morpholino-2,3,3a,8a-tetrahydropyrrolo[2,3-*b*]indole-1,8-dicarboxylate (**13**)

$^1\text{H NMR}$  (600 MHz, Chloroform-*d*)  $\delta$  7.50 (br, 1H), 6.76 (d,  $J = 8.4$  Hz, 2H), 6.41 (s, 1H), 3.95 (t,  $J = 7.3$  Hz, 1H), 3.89 – 3.84 (m, 4H), 3.81 – 3.77 (m, 1H), 3.18 – 3.04 (m, 4H), 2.87 – 2.82 (m, 1H), 2.13 – 1.97 (m, 1H), 1.56 (s, 9H), 1.49 (s, 9H) ppm.  $^{13}\text{C NMR}$  (150 MHz, Chloroform-*d*)  $\delta$  154.0, 152.6, 147.9, 136.7, 133.1, 128.4, 115.8, 112.4, 81.1, 80.0, 76.2, 66.9, 50.5, 45.4, 44.9, 29.7, 28.4 ppm. **HRMS** (ESI)  $m/z$ :  $[\text{M} + \text{Na}]^+$  Calcd for  $\text{C}_{24}\text{H}_{35}\text{O}_3\text{N}_5\text{Na}$  468.2469; Found 468.2474.

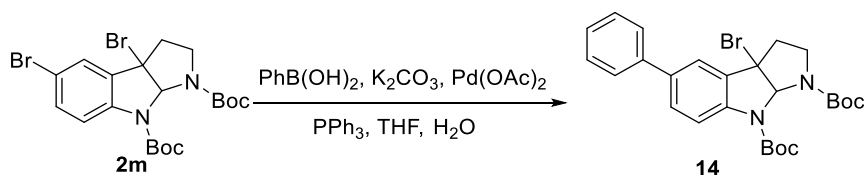

To a solution of **2m** (103.65 mg, 0.2 mmol) in THF (4 mL) were sequentially added  $\text{PhB(OH)}_2$  (48.78 mg, 0.4 mmol),  $\text{K}_2\text{CO}_3$  (30.41 mg, 0.22 mmol),  $\text{Pd(OAc)}_2$  (13.46 mg, 0.06 mmol),  $\text{PPh}_3$  (15.72 mg, 0.06 mmol) and  $\text{H}_2\text{O}$  (54  $\mu\text{L}$ , 3.0 mmol) under argon atmosphere, the mixture was stirred at room temperature, the reaction was completed after for 12 h. The solution was washed with water and the aqueous layer was extracted with DCM, the organic phase was washed with brine, dried over  $\text{Na}_2\text{SO}_4$  and concentrated under reduced pressure, the crude product was purified by silica gel column chromatography on silica gel to afford the product **14** as colorless oil (81.4 mg, 79% yield).

#### di-tert-butyl 3a-bromo-5-phenyl-2,3,3a,8a-tetrahydropyrrolo[2,3-*b*]indole-1,8-dicarboxylate (**14**)

$^1\text{H NMR}$  (600 MHz,  $\text{CDCl}_3$ )  $\delta$  7.65 (brs, 1H), 7.58 – 7.56 (m, 3H), 7.53 (dd,  $J = 8.4, 2.0$  Hz, 1H), 7.43 (t,  $J = 7.6$  Hz, 2H), 7.34 (t,  $J = 7.4$  Hz, 1H), 6.48 (s, 1H), 3.79 – 3.75 (m, 1H), 2.89 – 2.83 (m, 2H), 2.79 – 2.71 (m, 1H), 1.60 (s, 9H), 1.50 (s, 9H) ppm.  $^{13}\text{C NMR}$  (150 MHz, Chloroform-*d*)  $\delta$  153.4, 152.1, 141.4, 140.3, 137.4, 133.2, 129.3, 128.8, 127.3, 126.8, 122.4, 117.6, 84.2, 82.2, 80.8, 62.2, 46.2, 42.1, 28.4, 28.3 ppm. **HRMS** (ESI)  $m/z$ :  $[\text{M} + \text{Na}]^+$  Calcd for  $\text{C}_{26}\text{H}_{31}\text{O}_4\text{N}_2\text{BrNa}$  537.1359; Found 537.1346.

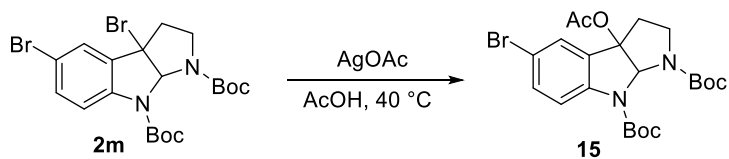

To a solution of **2m** (103.65 mg, 0.2 mmol) and AgOAc (36.72 mg, 0.22 mmol) in AcOH(20 mL) was heated to 40 °C in the dark, the reaction was completed as monitored by TLC, after 4 h. The reaction was extracted with EA, the organic phase was washed with brine and dried over Na<sub>2</sub>SO<sub>4</sub>, purified by column chromatography on silica gel to afford the product **15** as a white foam oil (81.7 mg, 82% yield)

**di-tert-butyl 3a-acetoxy-5-bromo-2,3,3a,8a-tetrahydropyrrolo[2,3-*b*]indole-1,8-dicarboxylate (15)**

<sup>1</sup>H NMR (600 MHz, CDCl<sub>3</sub>) δ 7.72 – 7.50 (m, 1H), 7.43 (dd, *J* = 8.6, 2.0 Hz, 1H), 6.42 (s, 1H), 3.95 – 3.92 (m, 1H), 2.85 – 2.80 (m, 1H), 2.62 – 2.56 (m, 1H), 2.43 – 2.37 (m, 1H), 2.05 (s, 3H), 1.59 (s, 9H), 1.51 (s, 9H) ppm. <sup>13</sup>C NMR (150 MHz, Chloroform-*d*) δ 169.5, 153.7, 152.0, 143.7, 133.4, 130.9, 127.7, 117.9, 115.4, 90.5, 82.1, 80.6, 80.1, 77.2, 77.0, 76.8, 44.9, 28.3, 28.3, 21.4 ppm. HRMS (ESI) *m/z*: [M + Na]<sup>+</sup> Calcd for C<sub>22</sub>H<sub>29</sub>O<sub>6</sub>N<sub>2</sub>BrNa 519.1101; Found 519.1086.

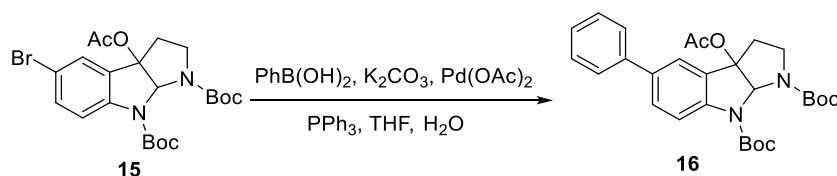

To a solution of **15** (99.48 mg, 0.2 mmol) in THF (2 mL) were sequentially added PhB(OH)<sub>2</sub> (48.8 mg, 0.4 mmol), K<sub>2</sub>CO<sub>3</sub> (30.41 mg, 0.22 mmol), Pd(OAc)<sub>2</sub> (13.5 mg, 0.06 mmol), PPh<sub>3</sub> (15.7 mg, 0.06 mmol) and H<sub>2</sub>O (54 μL, 3.0 mmol) under argon atmosphere, the mixture was stirred at room temperature, the reaction was completed after for 12 h. The solution was washed with water and the aqueous layer was extracted with DCM, the organic phase was washed with brine, dried over Na<sub>2</sub>SO<sub>4</sub> and concentrated under reduced pressure, the crude product was purified by silica gel column chromatography on silica gel to afford the product **16** as a colorless oil (53.8 mg, 54% yield).





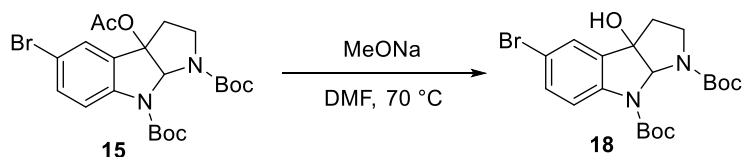

To a solution of **15** (99.48 mg, 0.2 mmol) in dry DMF (4 mL) was added MeONa in MeOH (4.0 M, 0.8 mL), the reaction was heated to 70 °C under argon atmosphere, the reaction was completed as monitored by TLC, after 1 h. The reaction was extracted with EA, the organic phase was washed with brine and dried over Na<sub>2</sub>SO<sub>4</sub>, purified by column chromatography on silica gel to afford the product **18** as a white foam oil (65.6 mg, 83% yield)

**di-tert-butyl 5-bromo-3a-hydroxy-2,3,3a,8a-tetrahydropyrrolo[2,3-*b*]indole-1,8-dicarboxylate (18)**

<sup>1</sup>H NMR (600 MHz, CDCl<sub>3</sub>) δ 7.56 (brs, 1H), 7.47 (d, *J* = 2.1 Hz, 1H), 7.39 (dd, *J* = 8.7, 2.1 Hz, 1H), 6.04 (s, 1H), 3.85 – 3.82 (m, 1H), 2.84 – 2.80 (m, 1H), 2.34 – 2.22 (m, 2H), 1.53 (s, 9H), 1.46 (s, 9H) ppm. <sup>13</sup>C NMR (150 MHz, Chloroform-*d*) δ 154.0, 152.3, 142.1, 134.4, 133.0, 126.7, 117.8, 115.6, 86.0, 82.2, 81.9, 80.5, 45.6, 38.9, 28.3, 28.3 ppm. HRMS (ESI) *m/z*: [M + Na]<sup>+</sup> Calcd for C<sub>20</sub>H<sub>27</sub>O<sub>5</sub>N<sub>2</sub>BrNa 477.0996; Found 477.0981.



Mr 473.16 946.36

Dx, g cm<sup>-3</sup> 1.622 1.622

Z 2 1

Mu (mm<sup>-1</sup>) 6.439 6.439

F000 468.0 468.0

F000' 466.91

h, k, lmax 9,12,15 9,12,15

Nref 3565 3541

Tmin, Tmax 0.524, 0.637 0.190,0.660

Tmin' 0.387

Correction method= # Reported T Limits: Tmin=0.190 Tmax=0.660 AbsCorr =

MULTI-SCAN Data completeness= 0.993

Theta (max)= 68.320

## 8. References

- [1] Y.-A. Wu, R.-A. Wang, S.-Y. Jiang, T.-B. Jiang, J.-R. Song, J. Shi, W. Wu, W.-D. Pan and H. Ren, *Green Chem.* 2022, **24**, 6720–6726.
- [2] T.-T. Sun, K. Liu, S.-X. Zhang, C.-R. Wang, C.-Z. Yao and J. Yu, *Synlett.* 2021, **32**, 701–707.
- [3] A.-E. Blom, J.-Y. Su, L.-M. Repka, S.-E. Reisman and D. A. Dougherty, *ACS Medicinal Chem. Lett.* 2020, **11**, 2204–2211.
- [4] W. Xie, G. Jiang, H. Liu, J. Hu, X. Pan, H. Zhang, X.-L. Wang, Y.-S. Lai and D. Ma, *Angew. Chem. Int. Ed.* 2013, **52**, 12924–12927.

## 9. $^1\text{H}$ NMR, $^{13}\text{C}$ NMR and $^{19}\text{F}$ NMR spectra of compounds

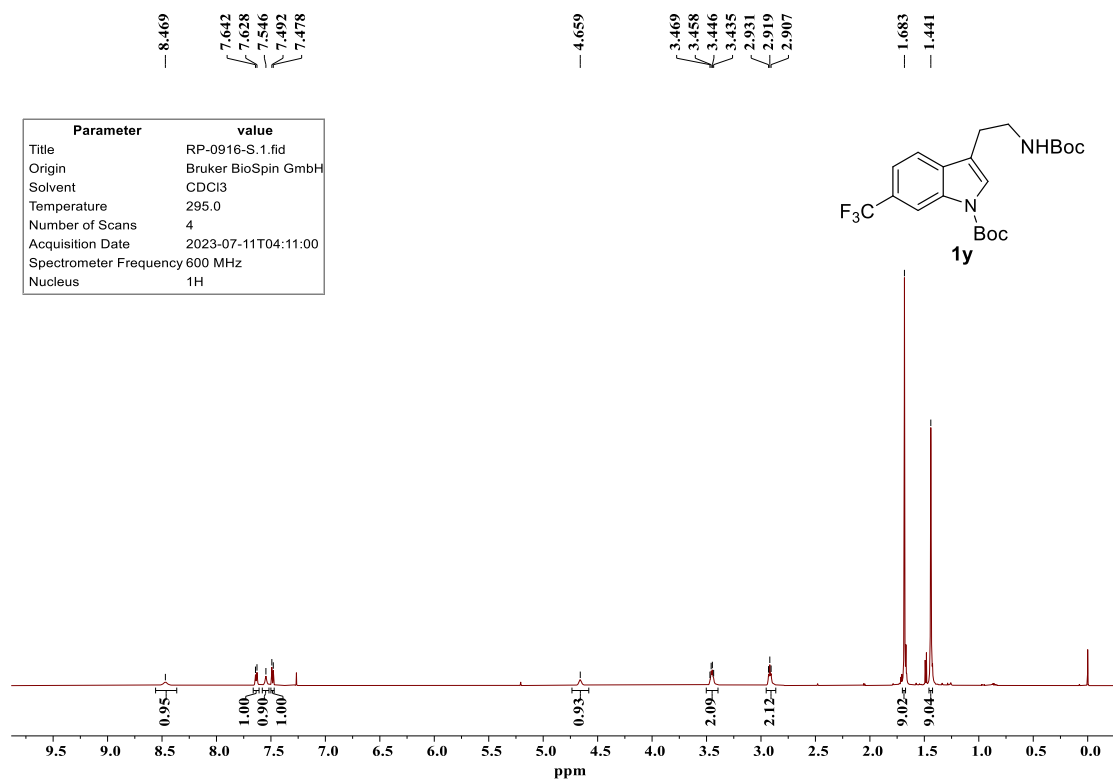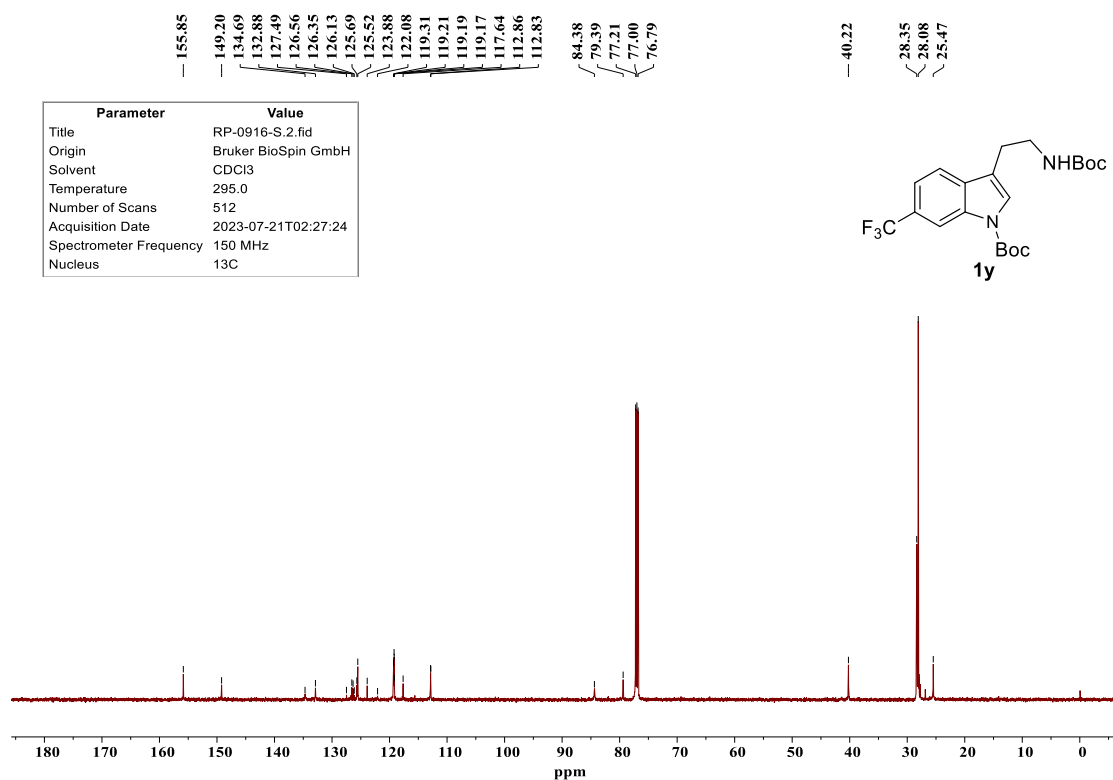

| Parameter              | value               |
|------------------------|---------------------|
| Title                  | RP-0916-S.3.fid     |
| Origin                 | Bruker BioSpin GmbH |
| Solvent                | CDCl3               |
| Temperature            | 295.1               |
| Number of Scans        | 16                  |
| Acquisition Date       | 2023-07-21T02:28:51 |
| Spectrometer Frequency | 565 MHz             |
| Nucleus                | 19F                 |

00191.00

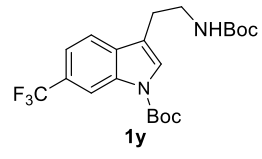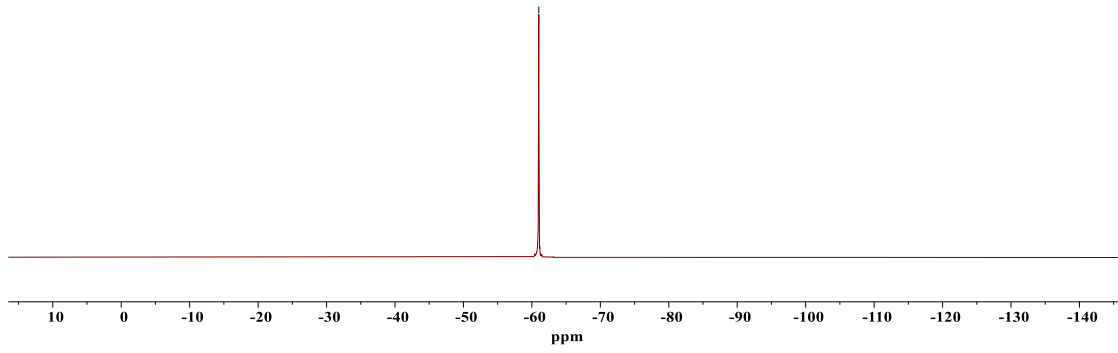

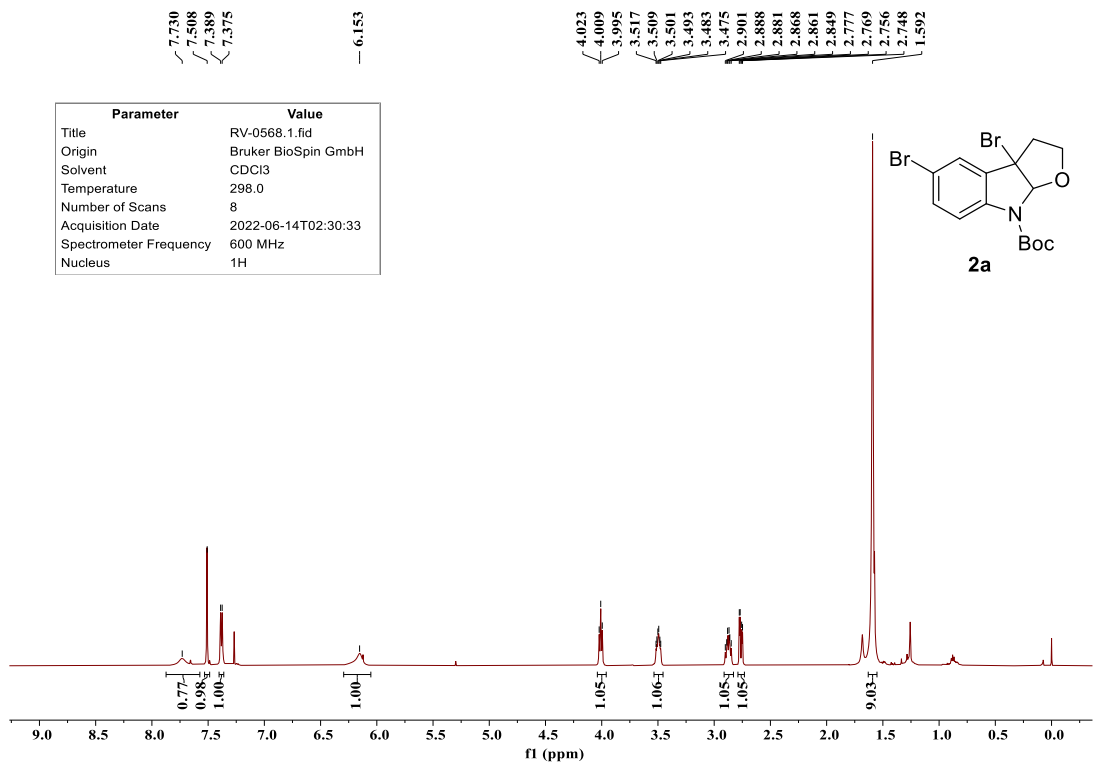

| Parameter              | Value               |
|------------------------|---------------------|
| Title                  | RV-0568.1.fid       |
| Origin                 | Bruker BioSpin GmbH |
| Solvent                | CDCl3               |
| Temperature            | 298.0               |
| Number of Scans        | 8                   |
| Acquisition Date       | 2022-06-14T02:30:33 |
| Spectrometer Frequency | 600 MHz             |
| Nucleus                | 1H                  |

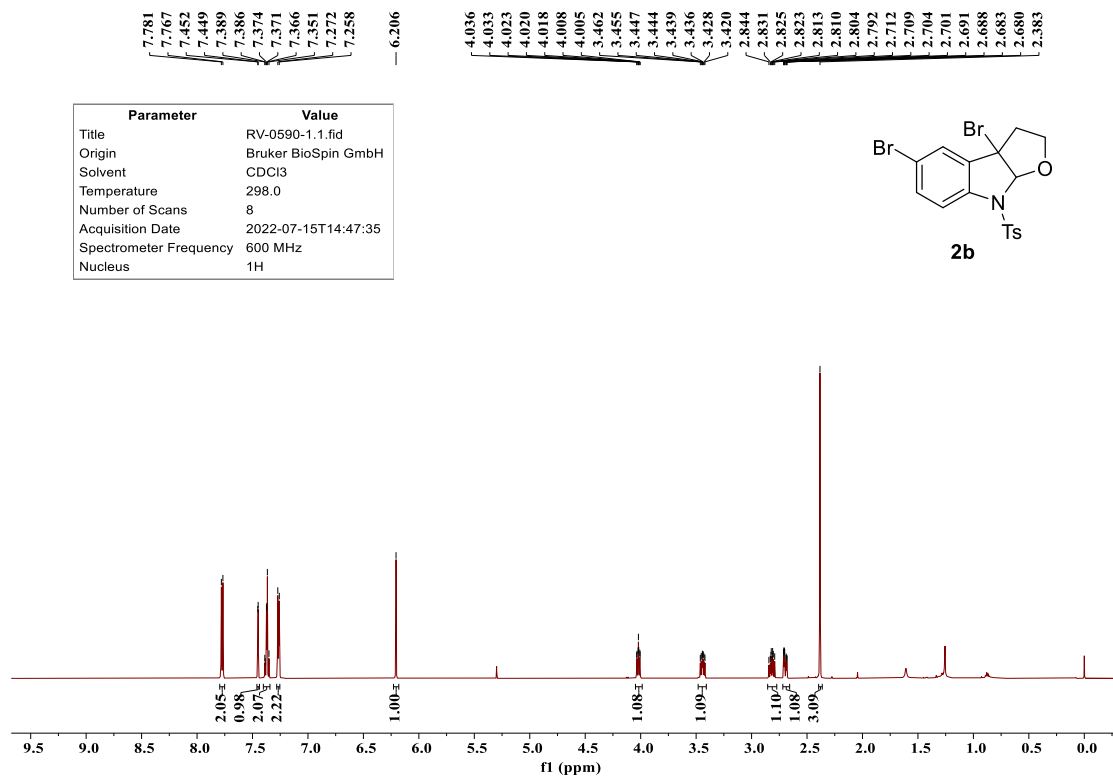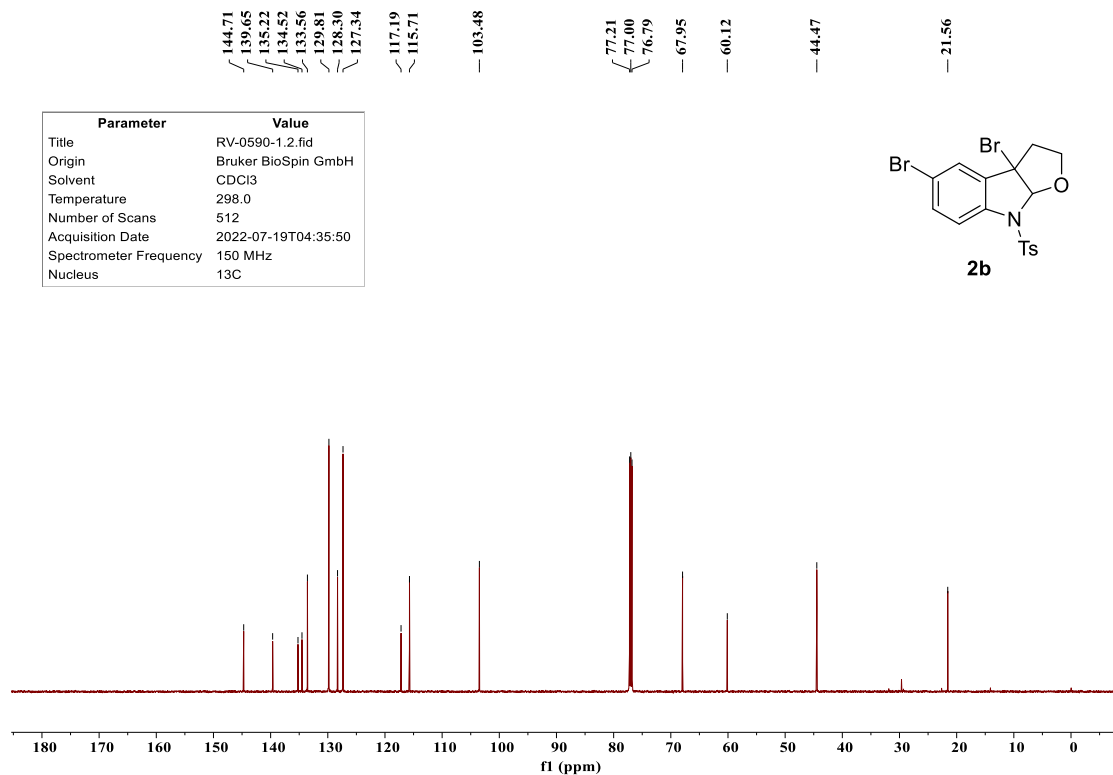



7.770 7.531 7.527 7.453 7.450 7.439 7.423 7.411 7.398 7.386 7.364 7.355 7.352 7.349 7.346 7.341 7.338 6.255 5.371 5.351 5.308 5.297 4.048 4.036 4.021 3.539 3.532 3.524 3.521 3.516 3.513 3.505 3.498 2.908 2.895 2.888 2.875 2.868 2.862 2.856 2.853 2.792 2.786 2.772 2.765

| Parameters             |                     |
|------------------------|---------------------|
| Parameter              | value               |
| Title                  | RV-0739.1.fid       |
| Origin                 | Bruker BioSpin GmbH |
| Solvent                | CDCl3               |
| Temperature            | 295.0               |
| Number of Scans        | 8                   |
| Acquisition Date       | 2023-06-16T16:24:19 |
| Spectrometer Frequency | 600 MHz             |
| Nucleus                | 1H                  |

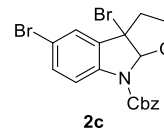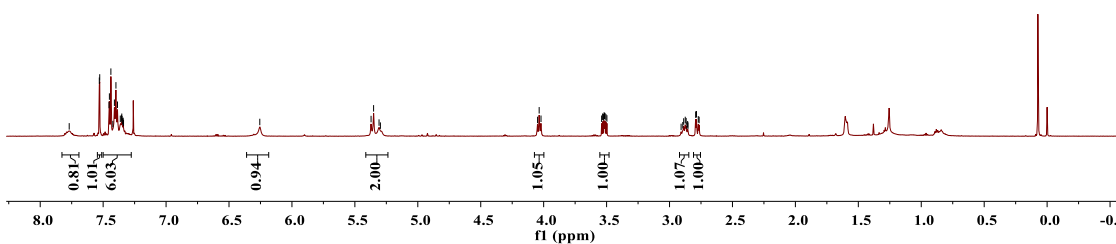

152.14 140.49 135.53 133.47 129.03 128.64 128.35 127.91 127.07 116.41 116.33 100.80 77.21 77.00 76.79 67.92 67.77 60.36 44.80

| Parameter              | Value               |
|------------------------|---------------------|
| Title                  | SY-0472.2.fid       |
| Origin                 | Bruker BioSpin GmbH |
| Solvent                | CDCl3               |
| Temperature            | 293.0               |
| Number of Scans        | 260                 |
| Acquisition Date       | 2023-08-07T15:31:37 |
| Spectrometer Frequency | 150 MHz             |
| Nucleus                | 13C                 |

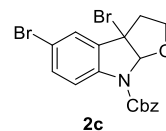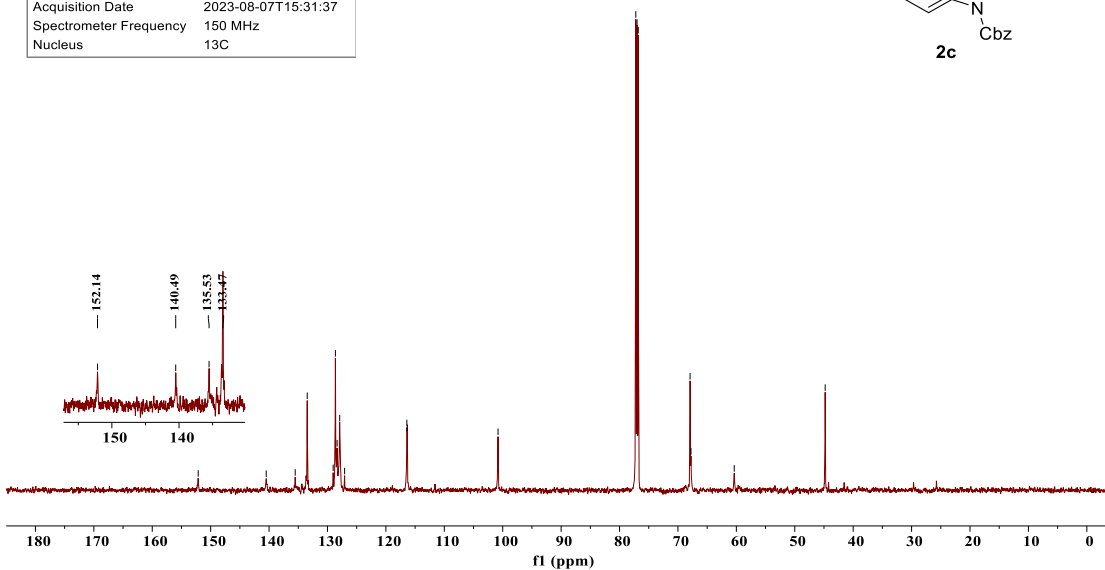

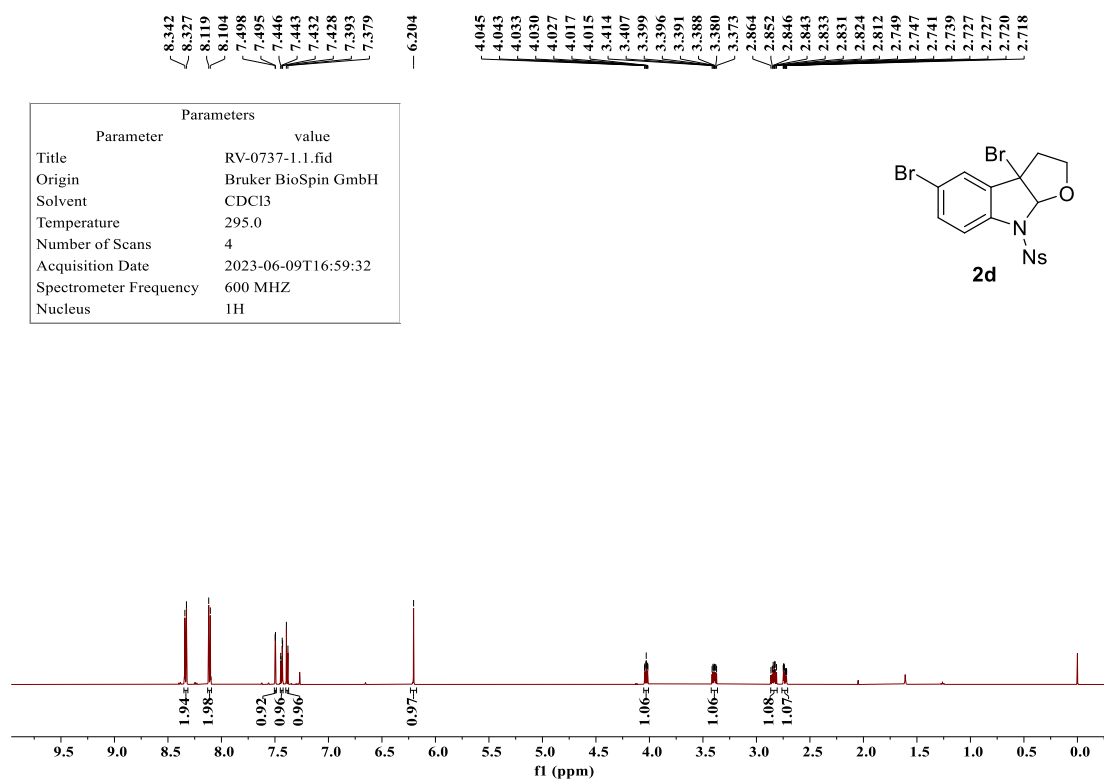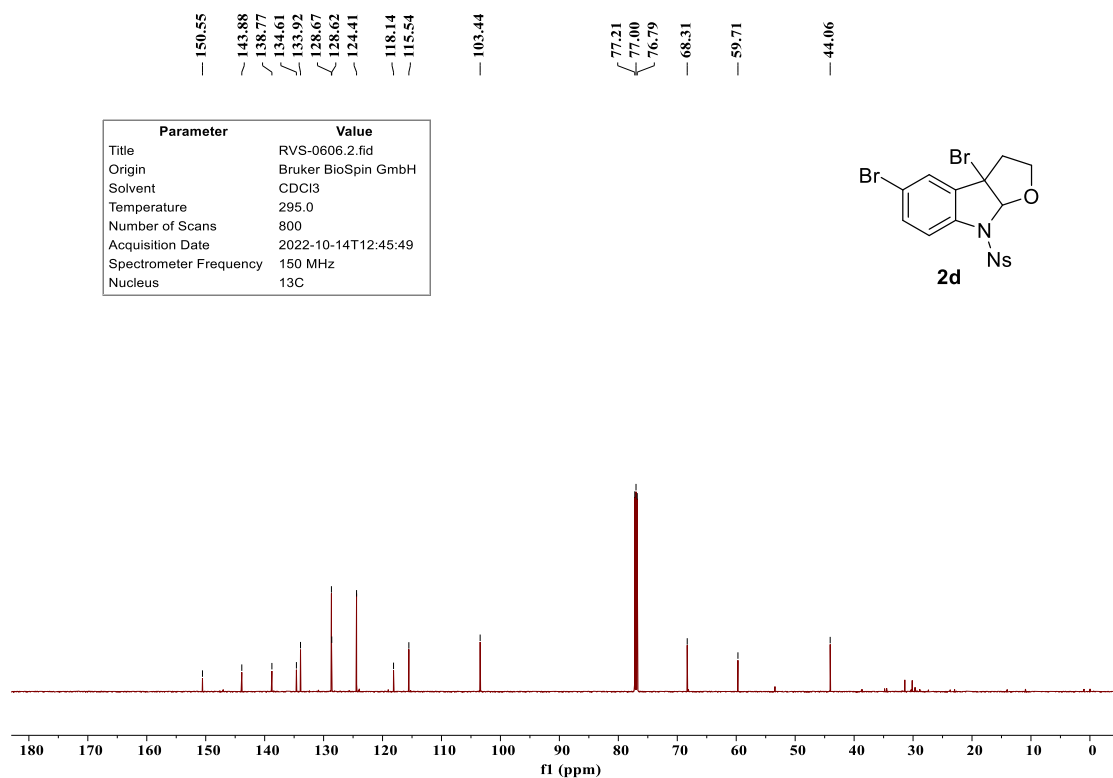

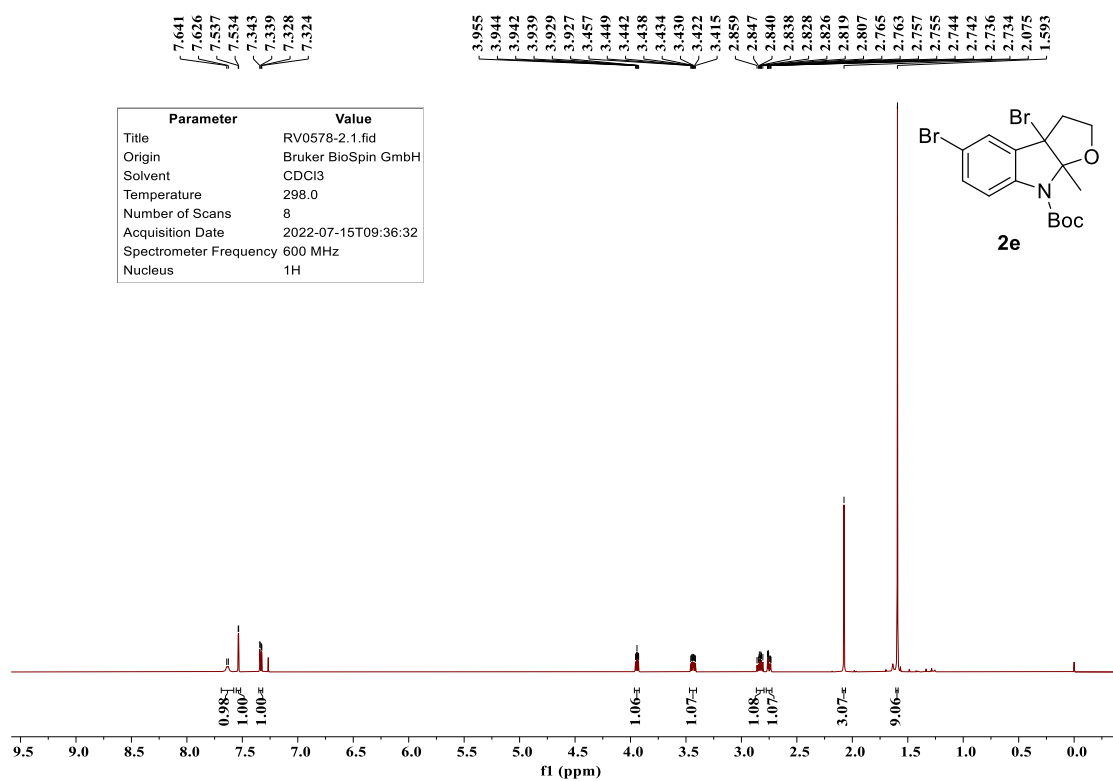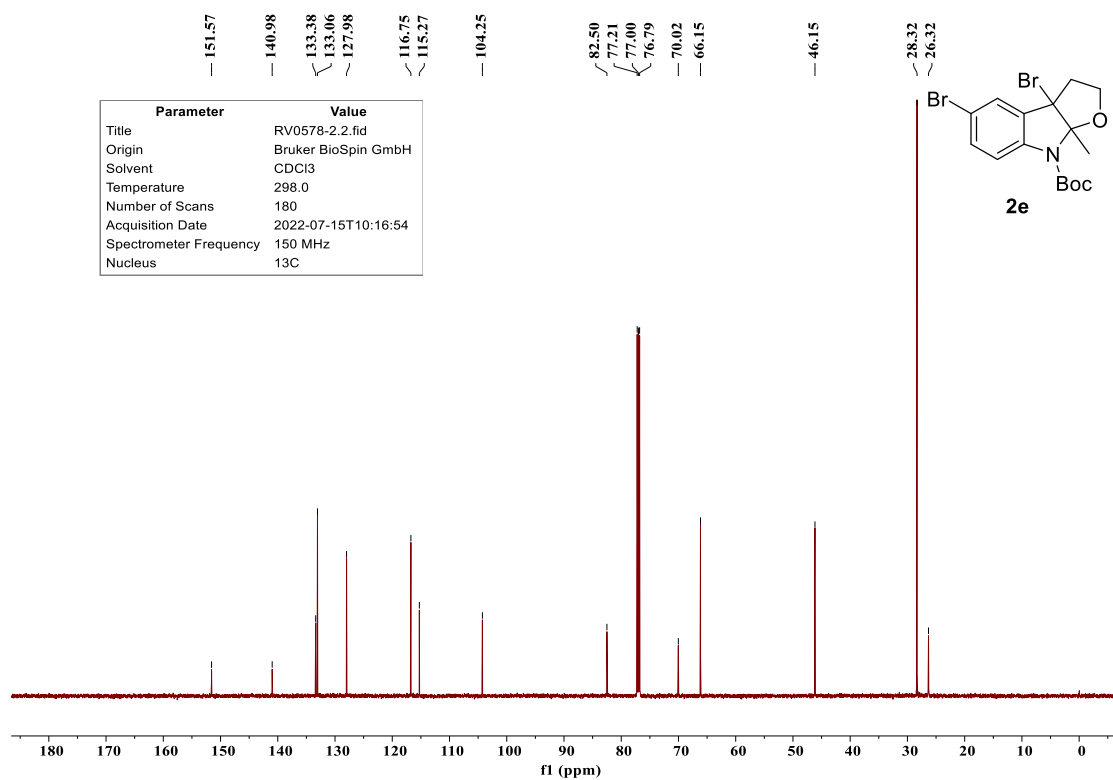

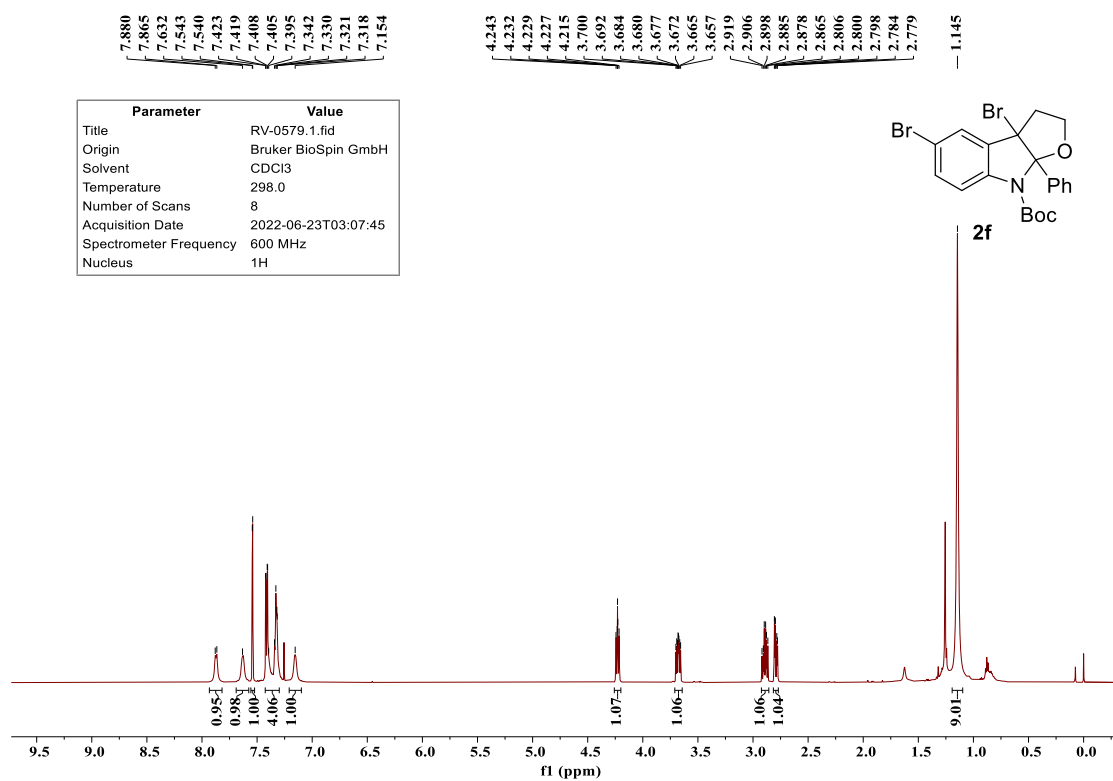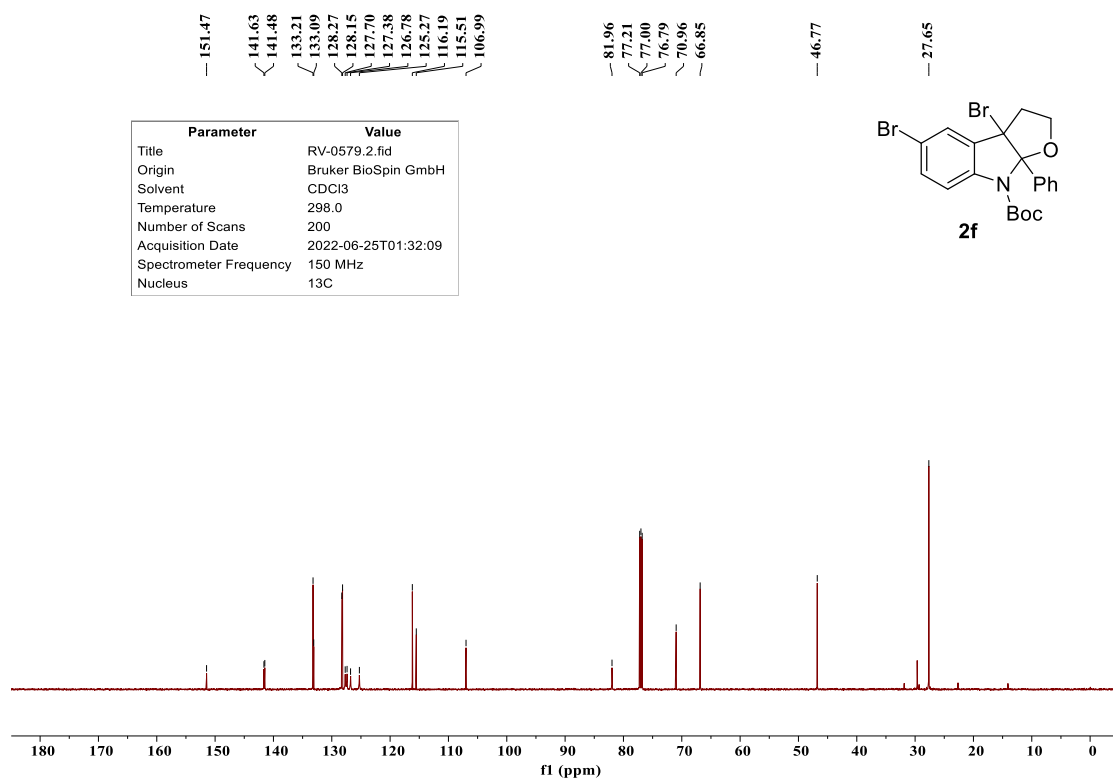

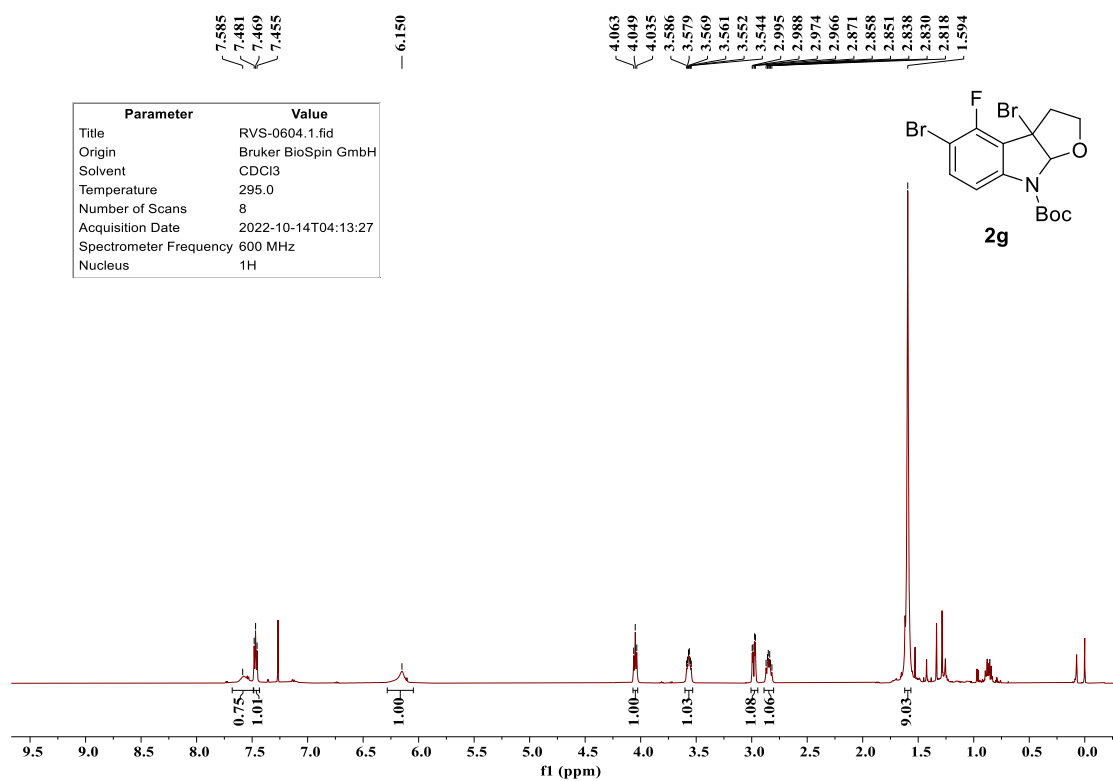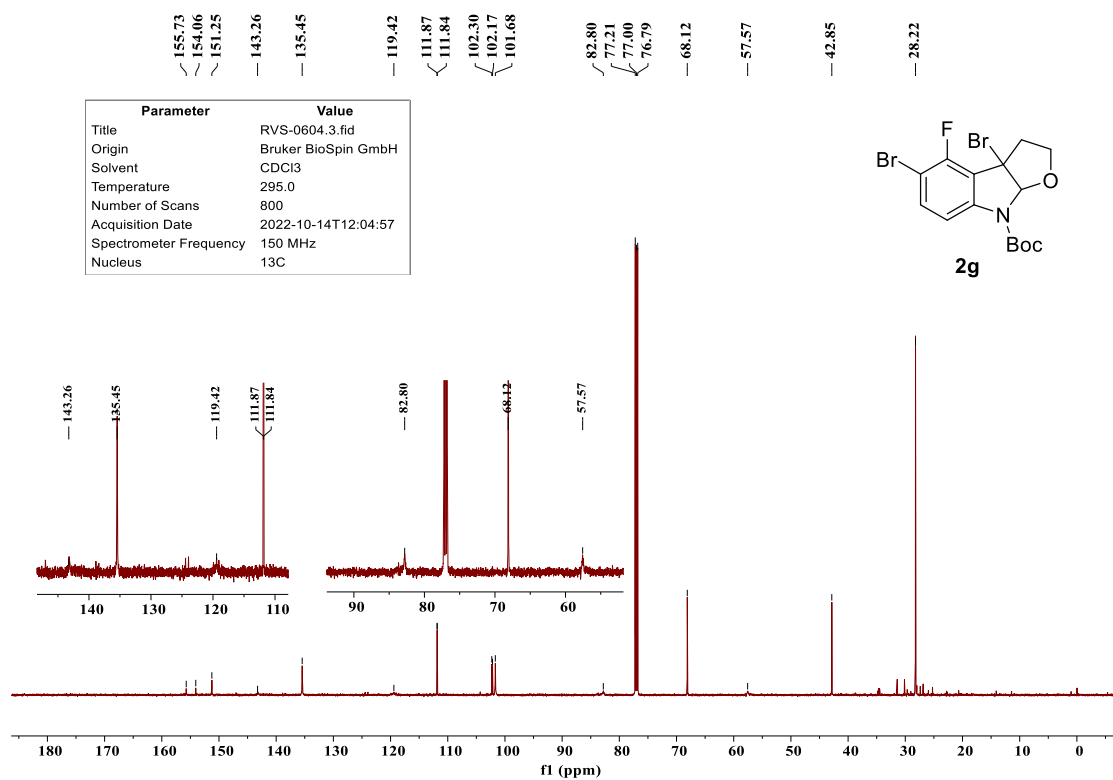

| Parameter              | Value               |
|------------------------|---------------------|
| Title                  | RVS-0604.2.fid      |
| Origin                 | Bruker BioSpin GmbH |
| Solvent                | CDCl3               |
| Temperature            | 295.2               |
| Number of Scans        | 16                  |
| Acquisition Date       | 2022-10-14T11:25:42 |
| Spectrometer Frequency | 565 MHz             |
| Nucleus                | 19F                 |

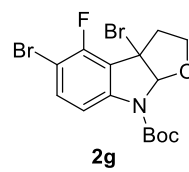

-110.836

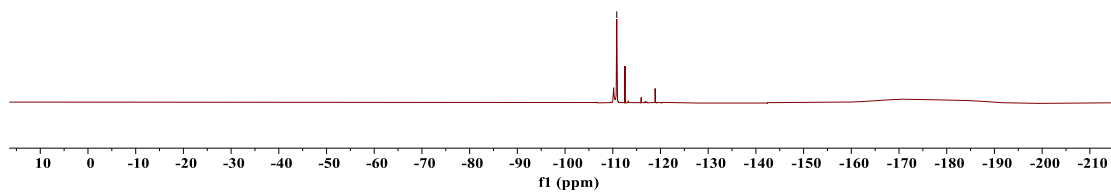

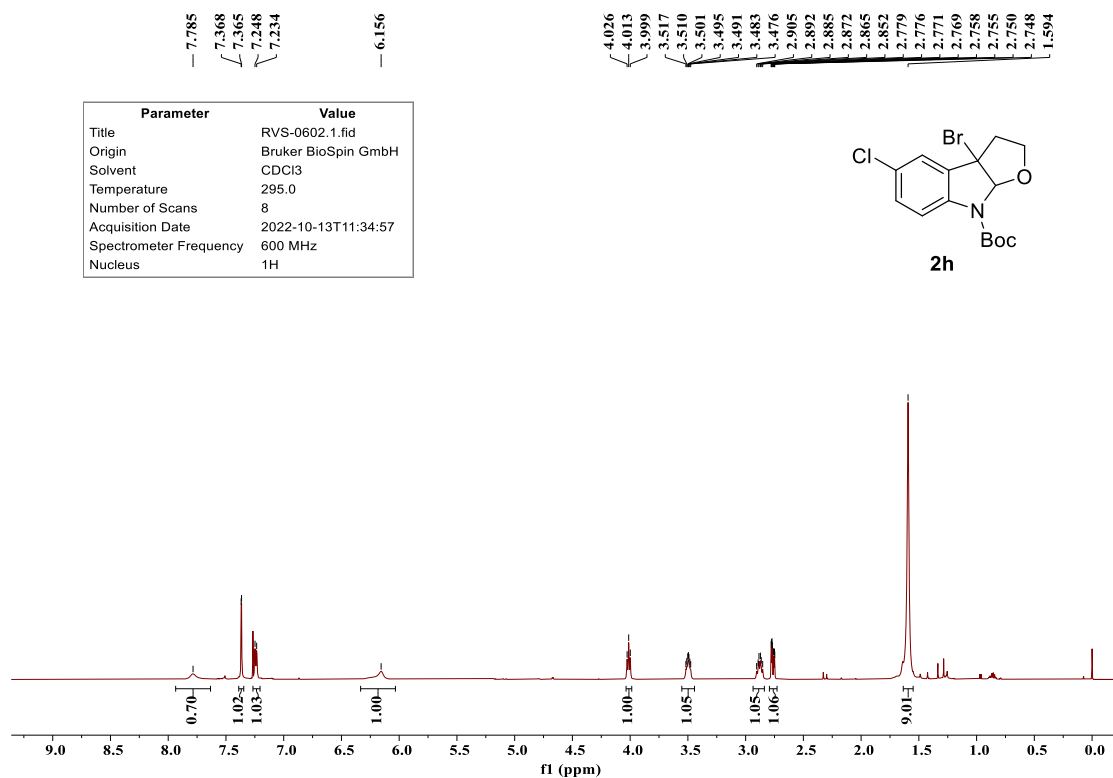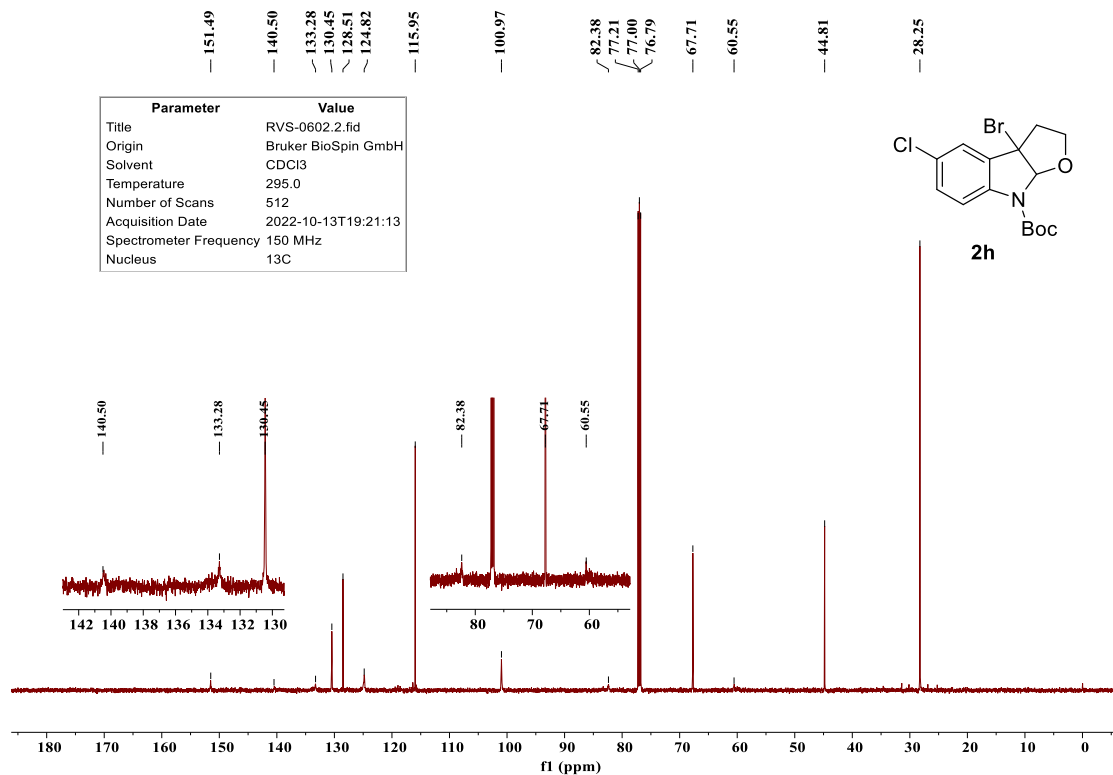

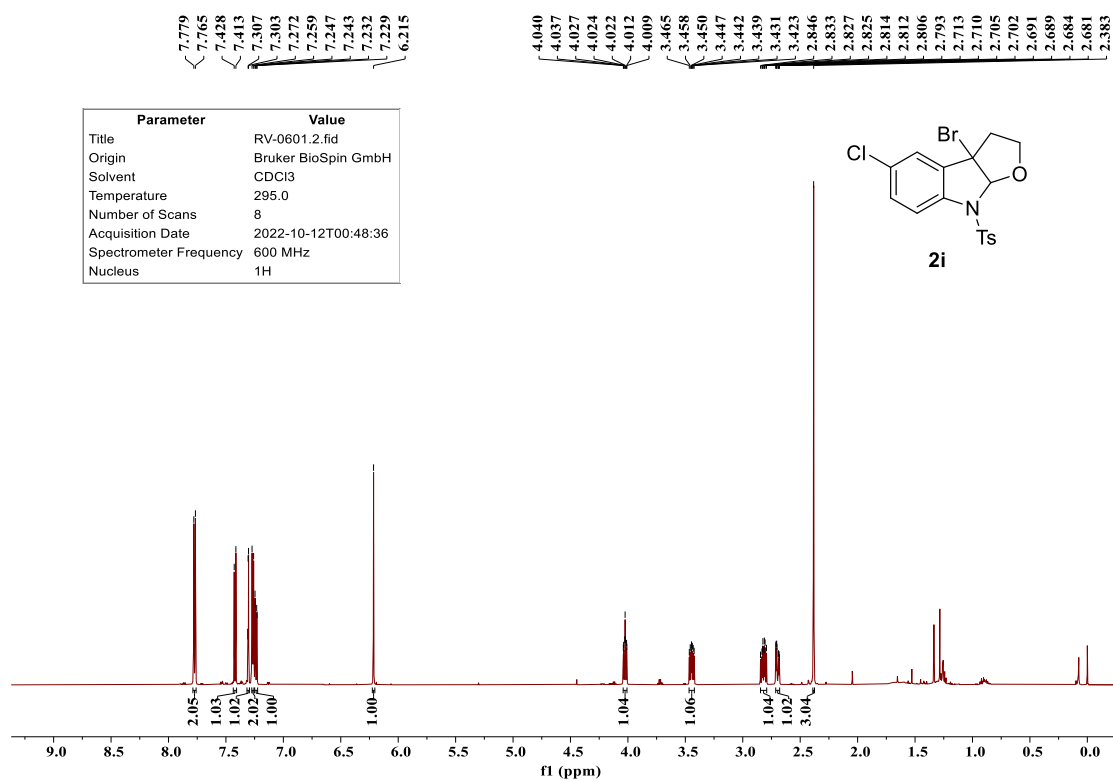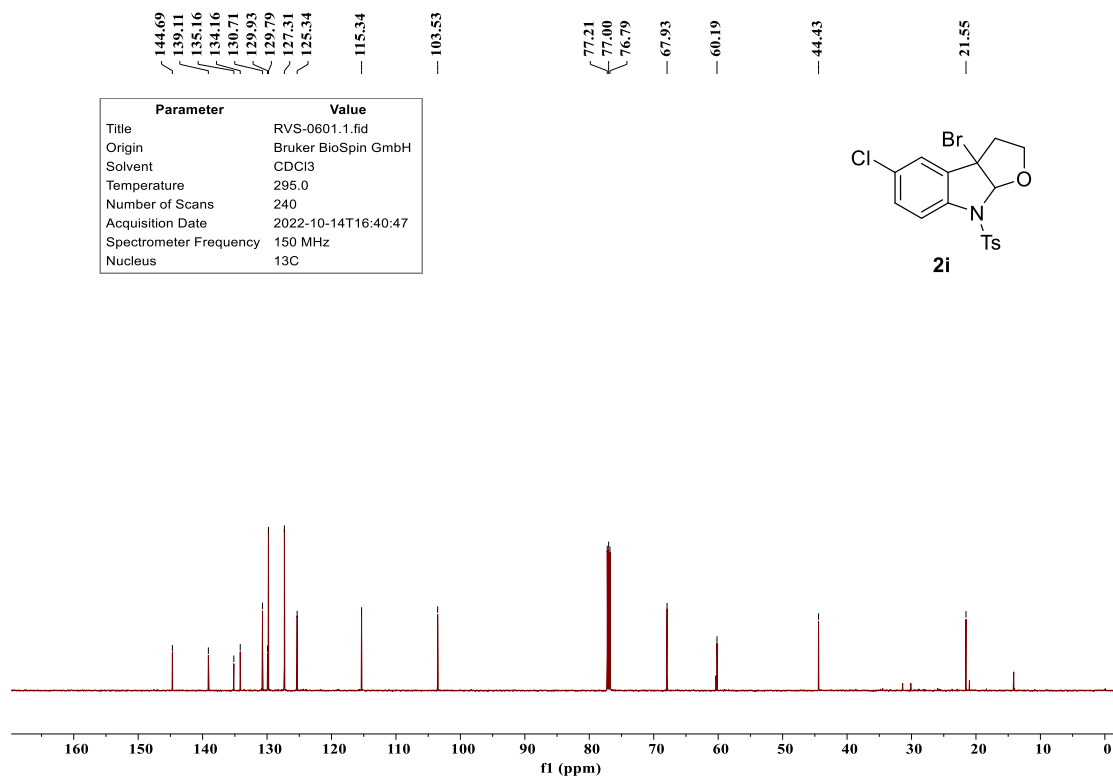



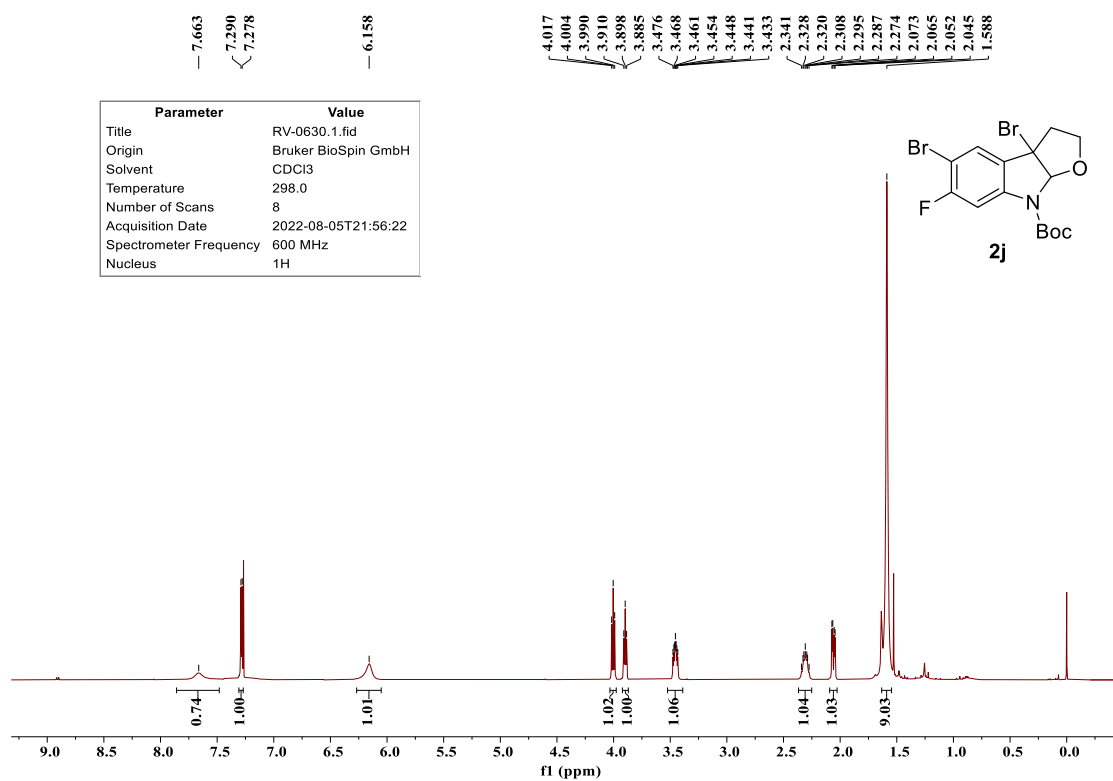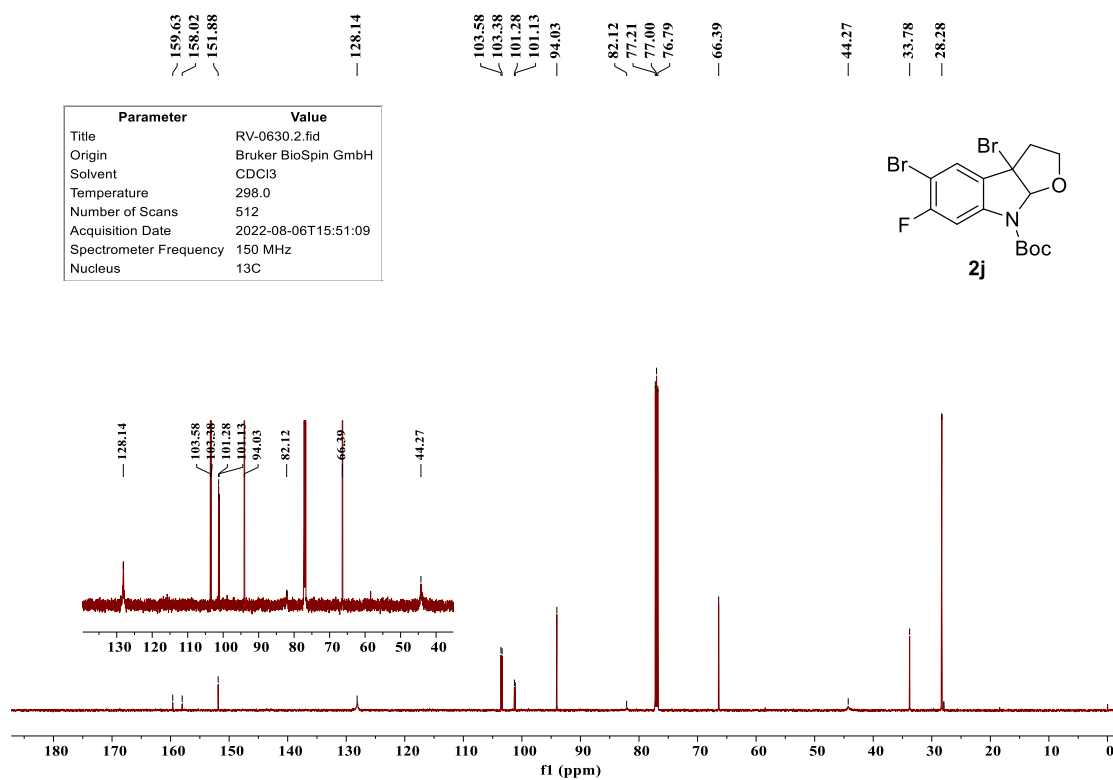

--106.65

| Parameter              | Value               |
|------------------------|---------------------|
| Title                  | RV-0630.3.fid       |
| Origin                 | Bruker BioSpin GmbH |
| Solvent                | CDCl <sub>3</sub>   |
| Temperature            | 298.0               |
| Number of Scans        | 16                  |
| Acquisition Date       | 2022-08-06T15:52:35 |
| Spectrometer Frequency | 565 MHz             |
| Nucleus                | <sup>19</sup> F     |

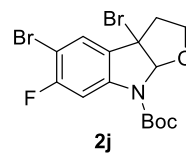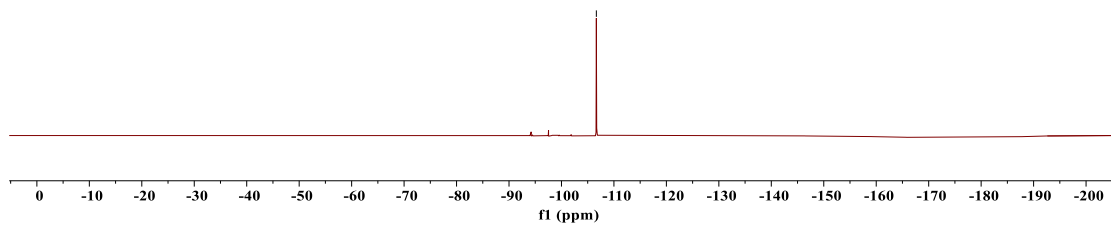

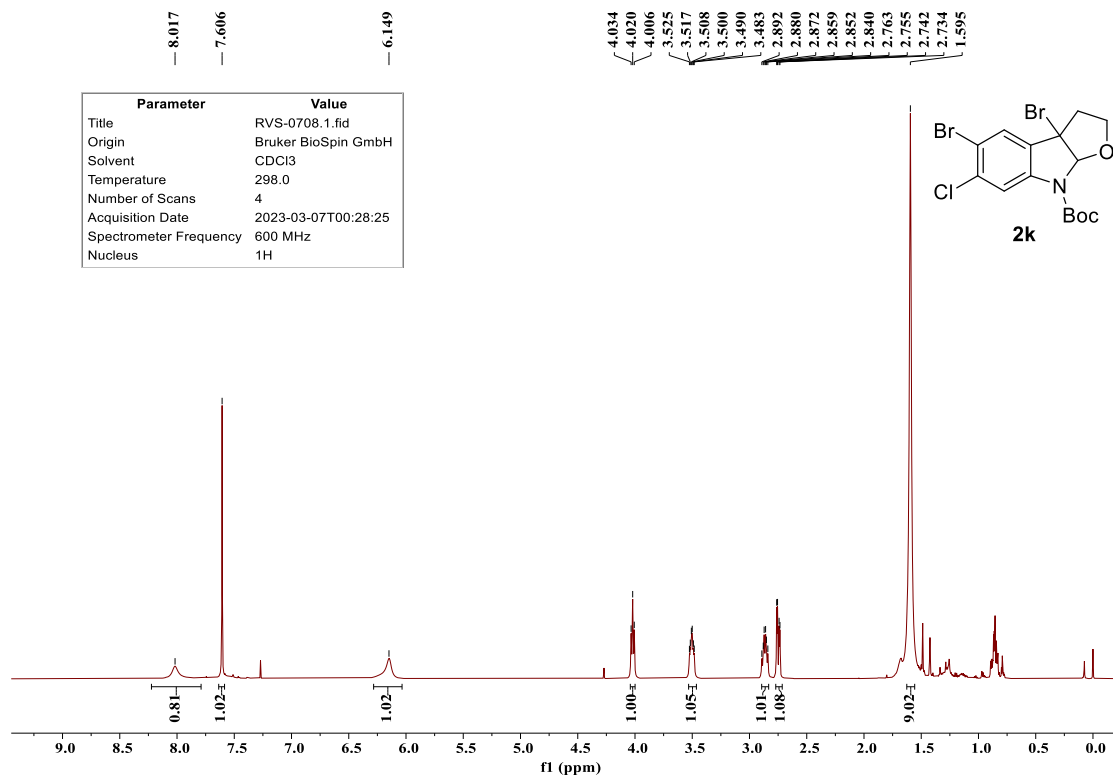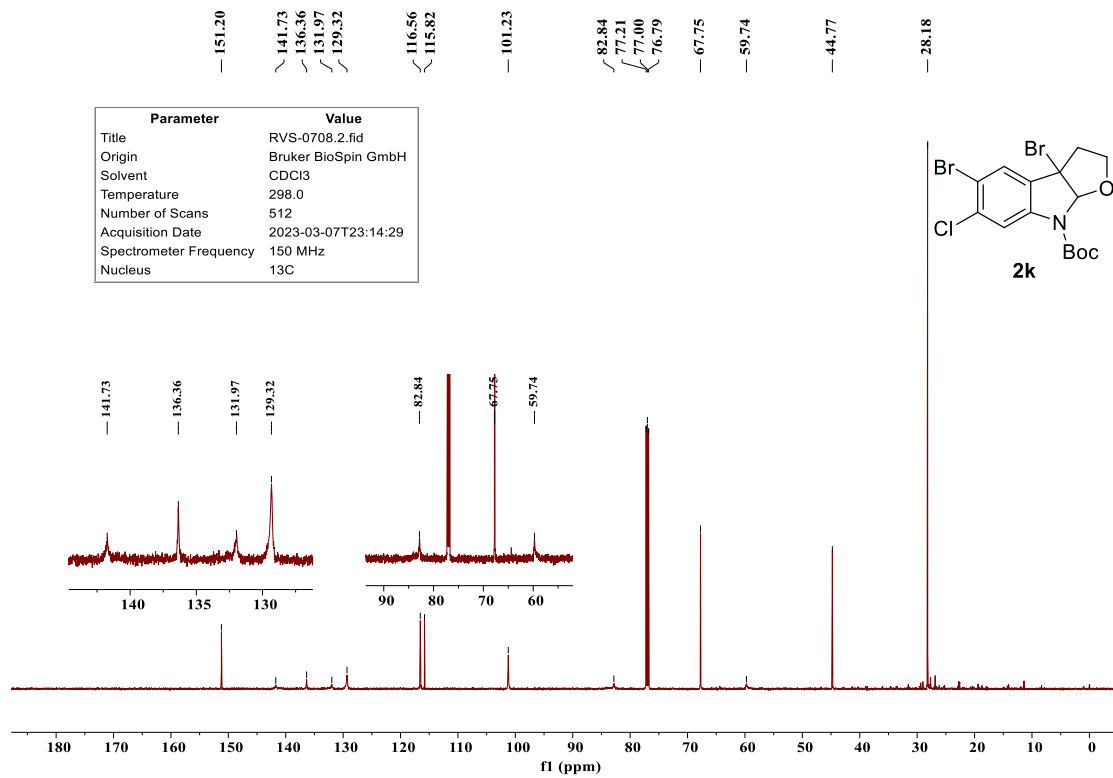

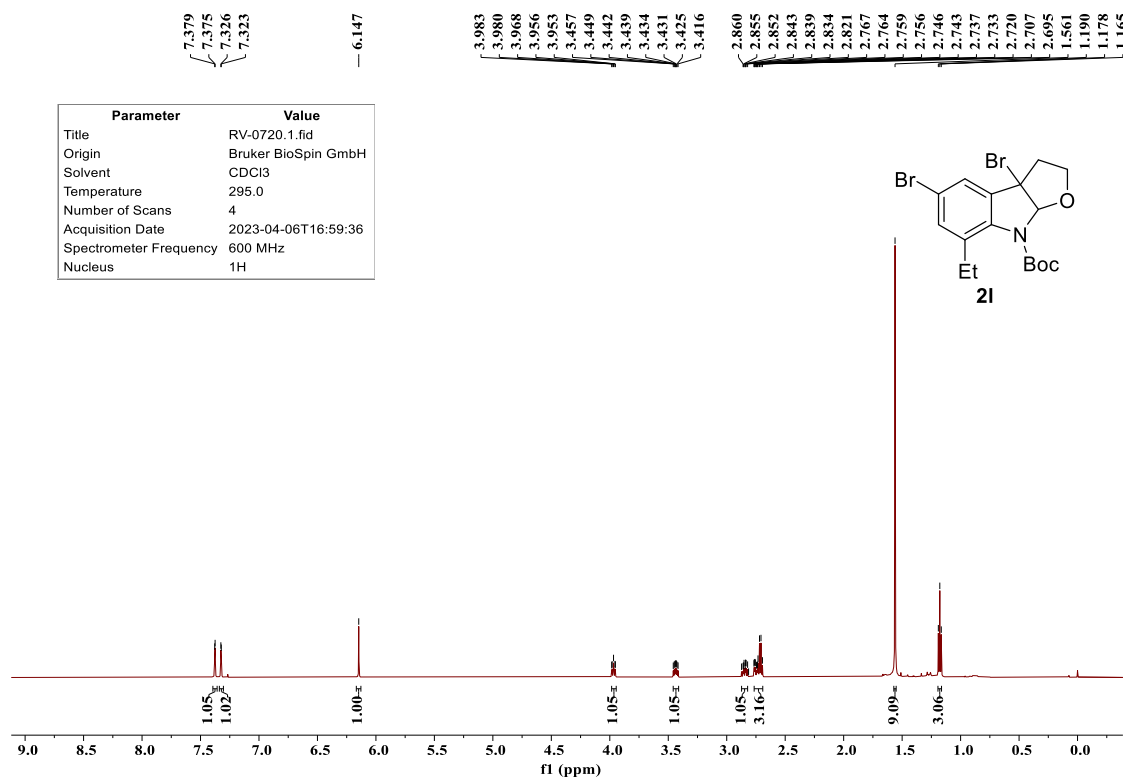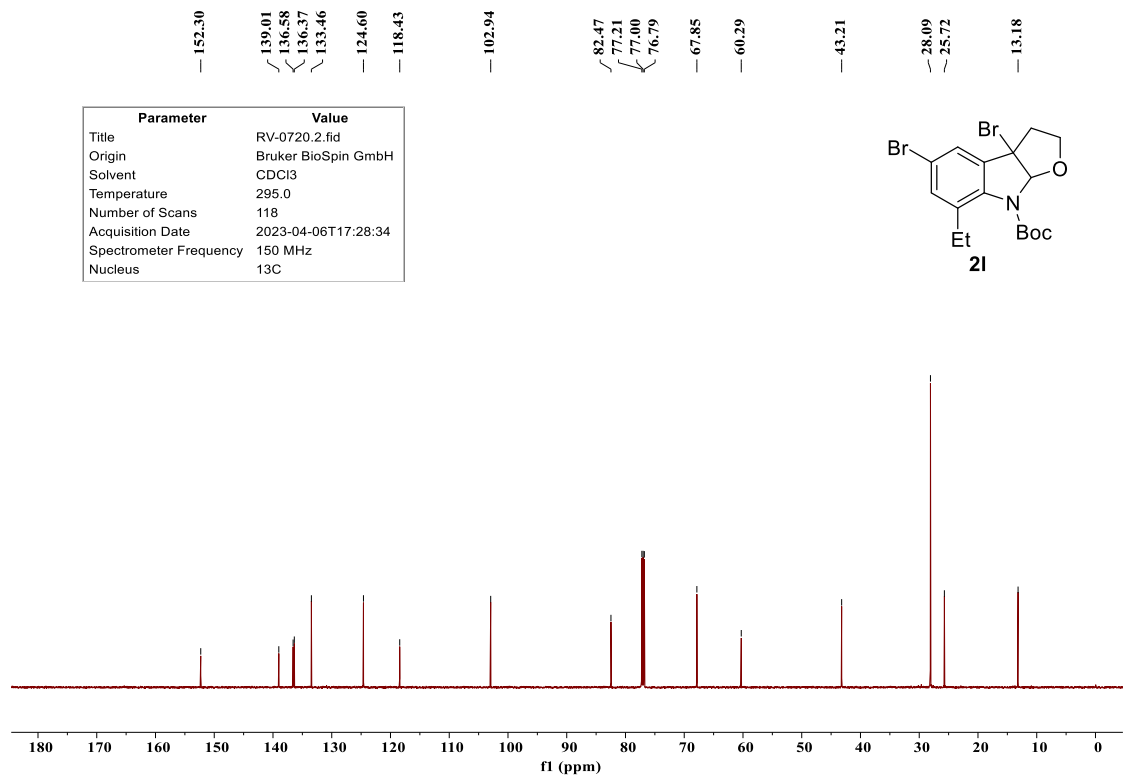

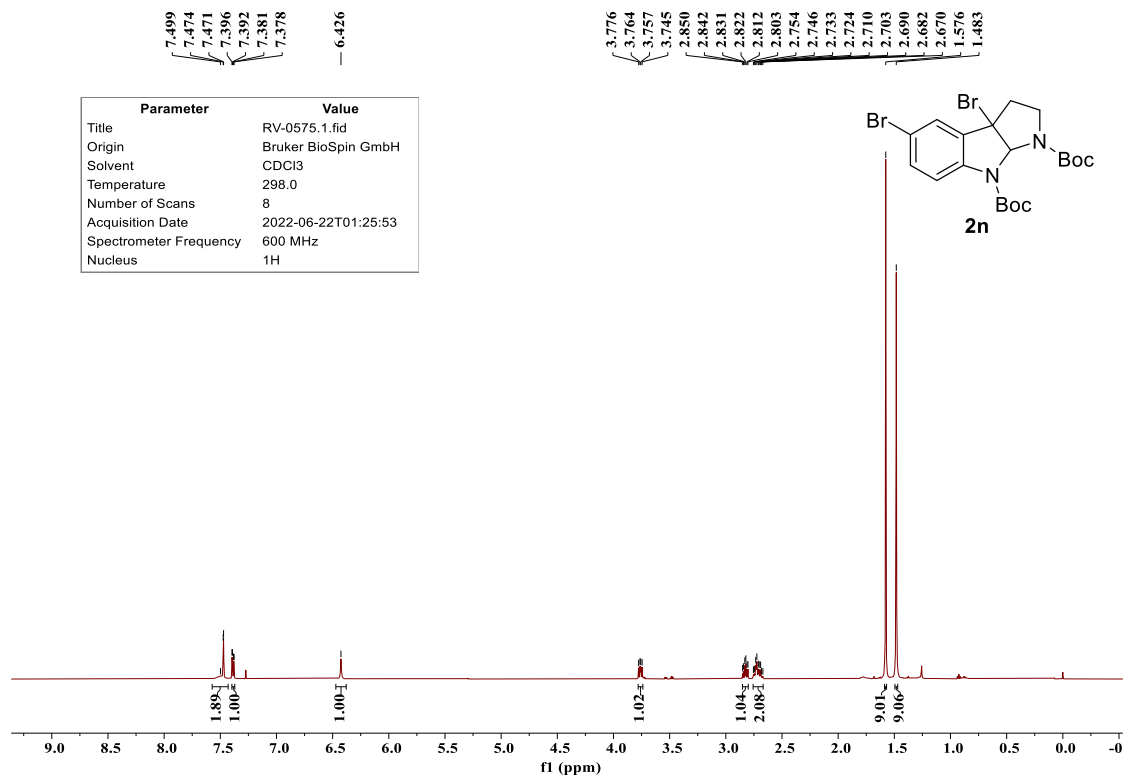

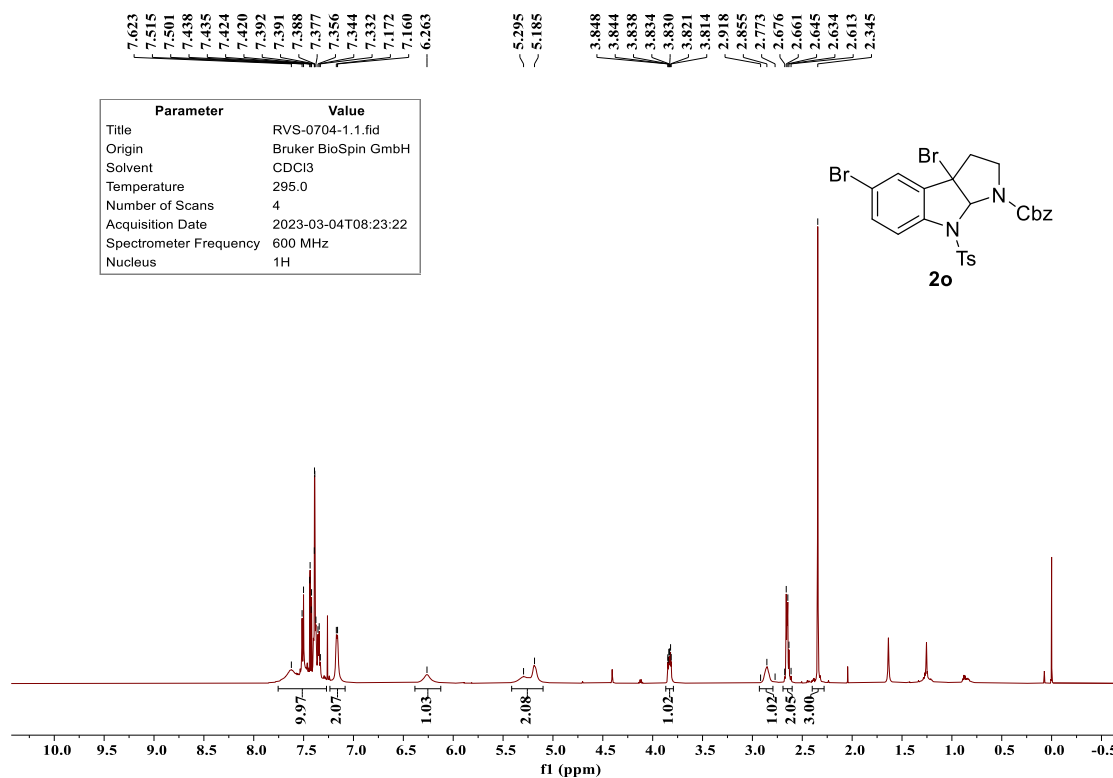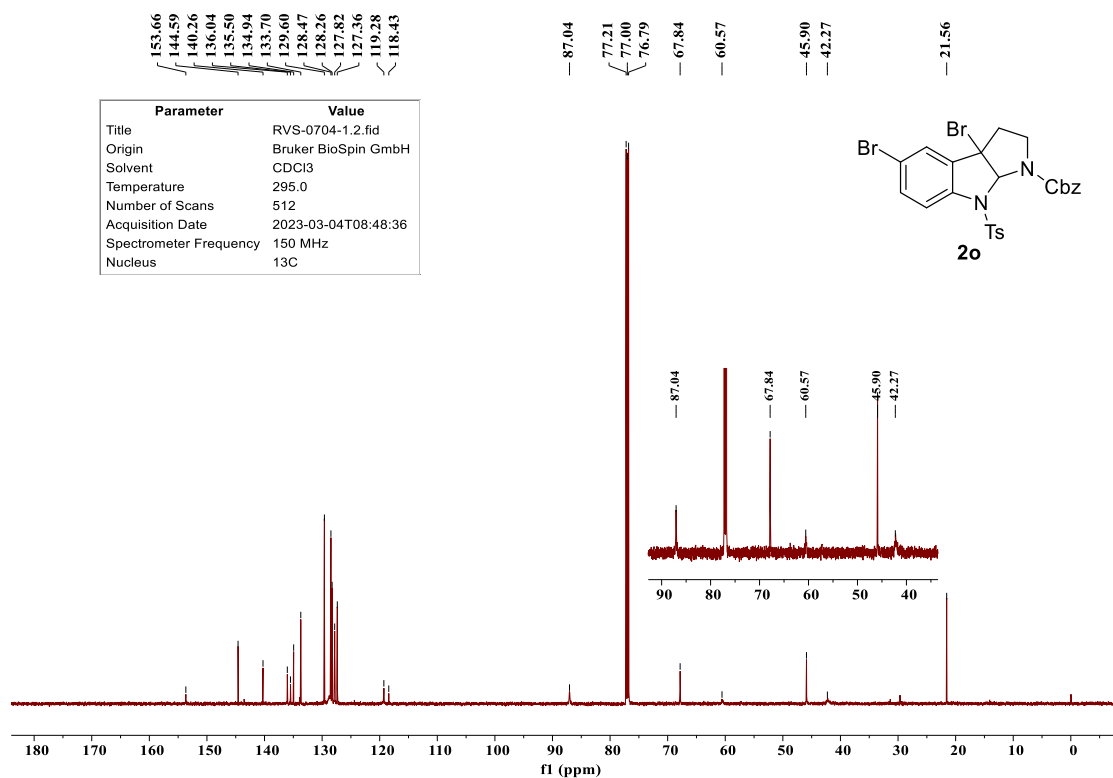

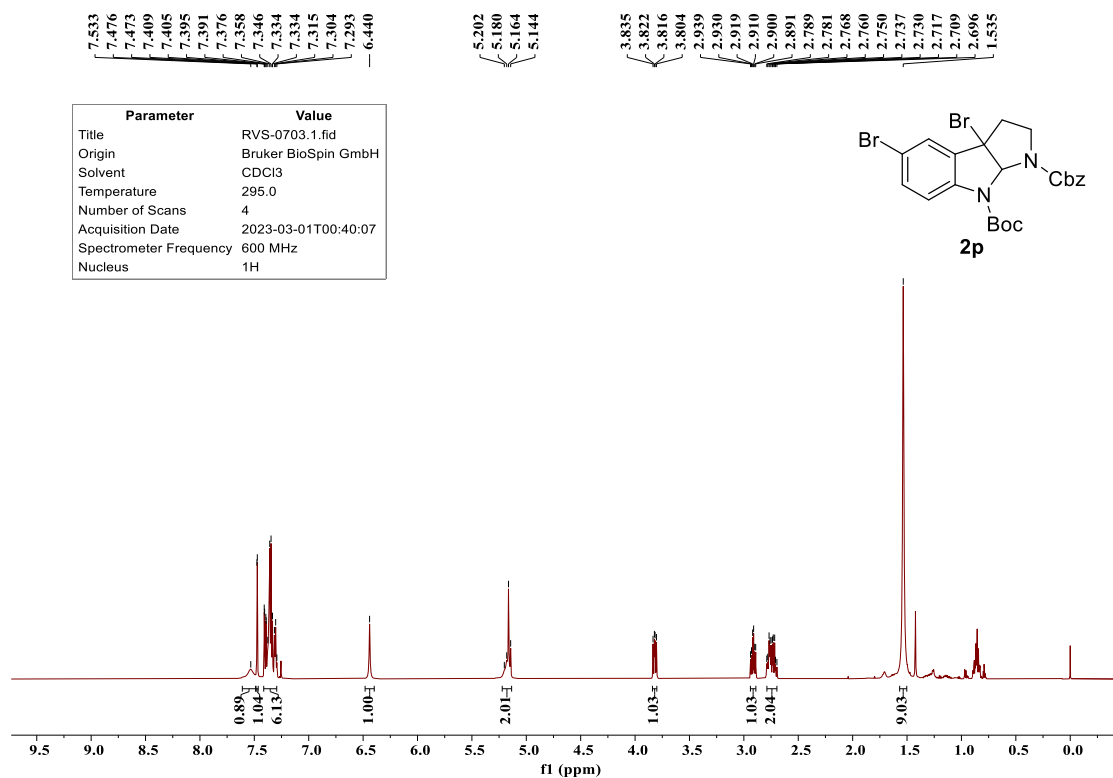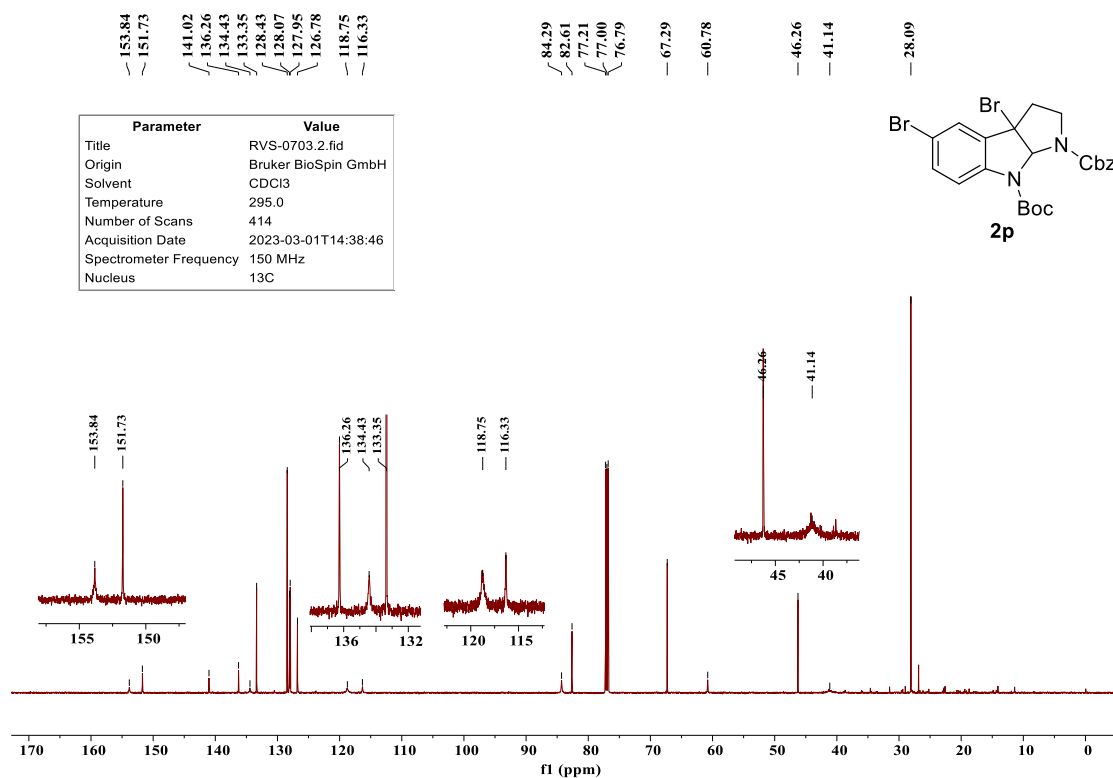

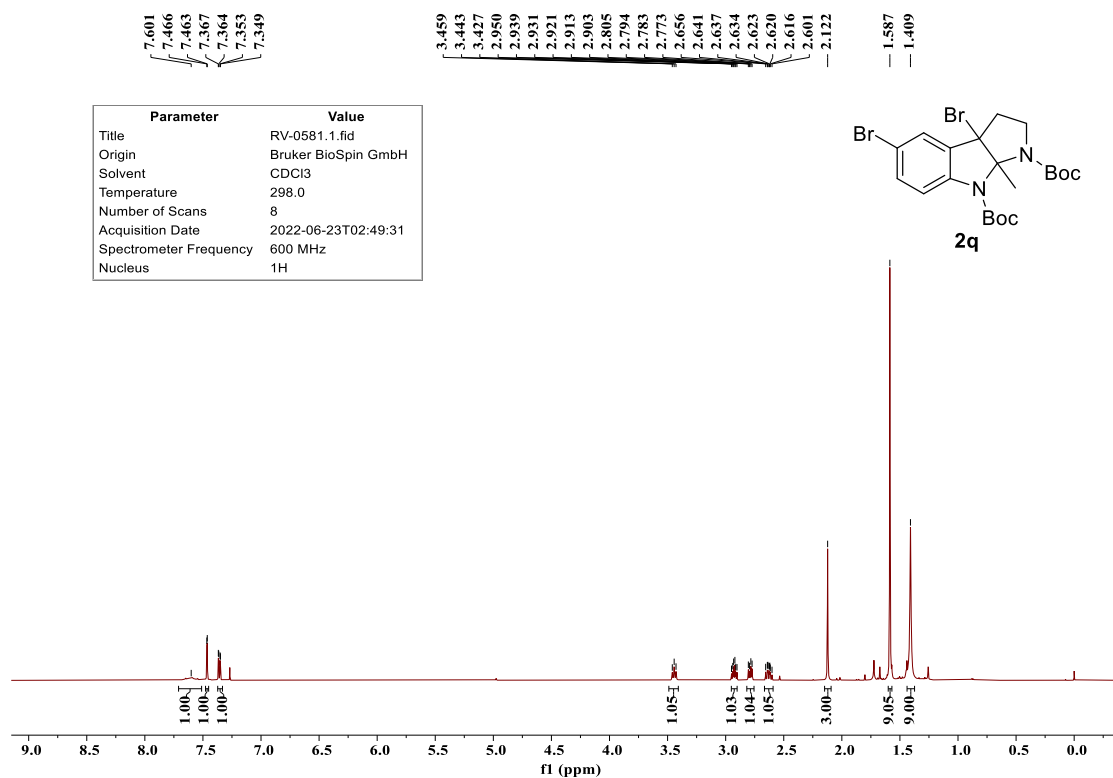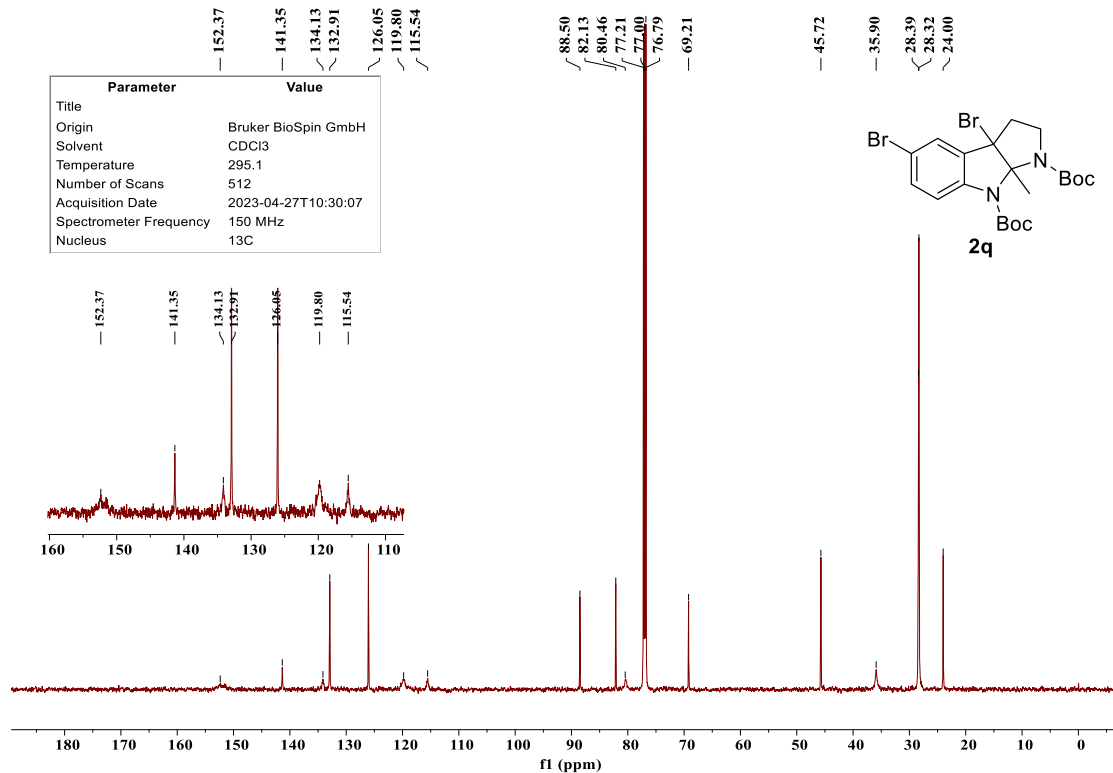



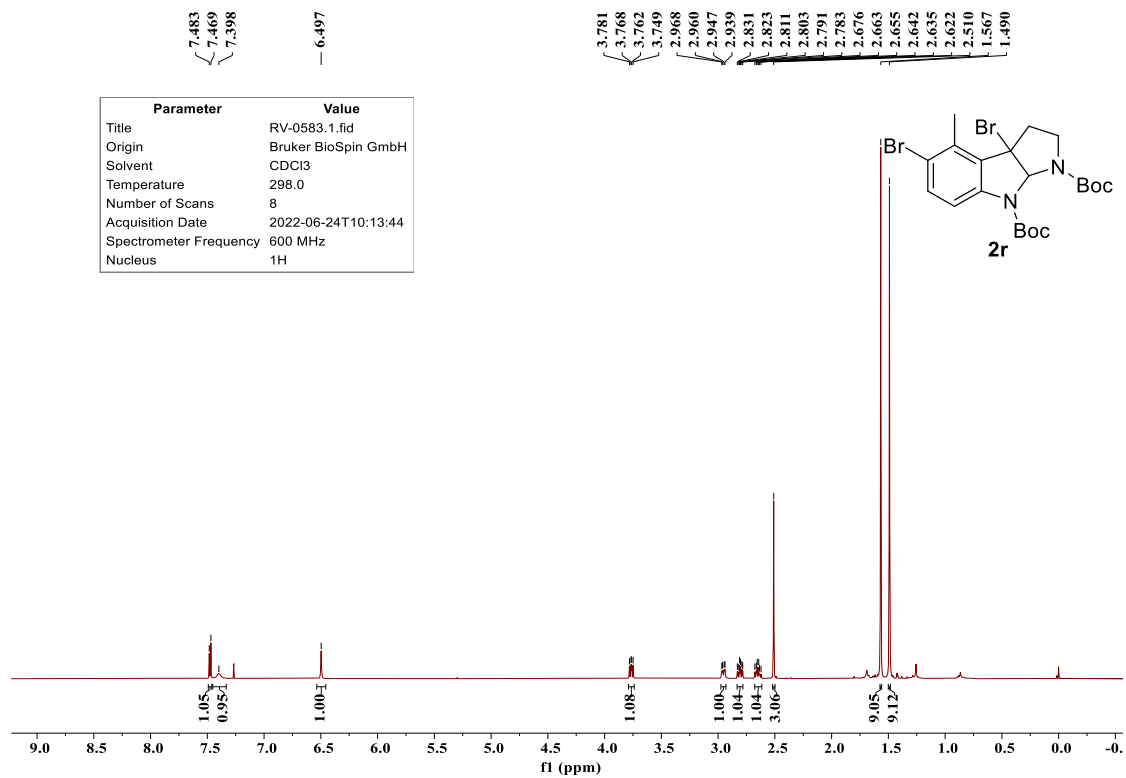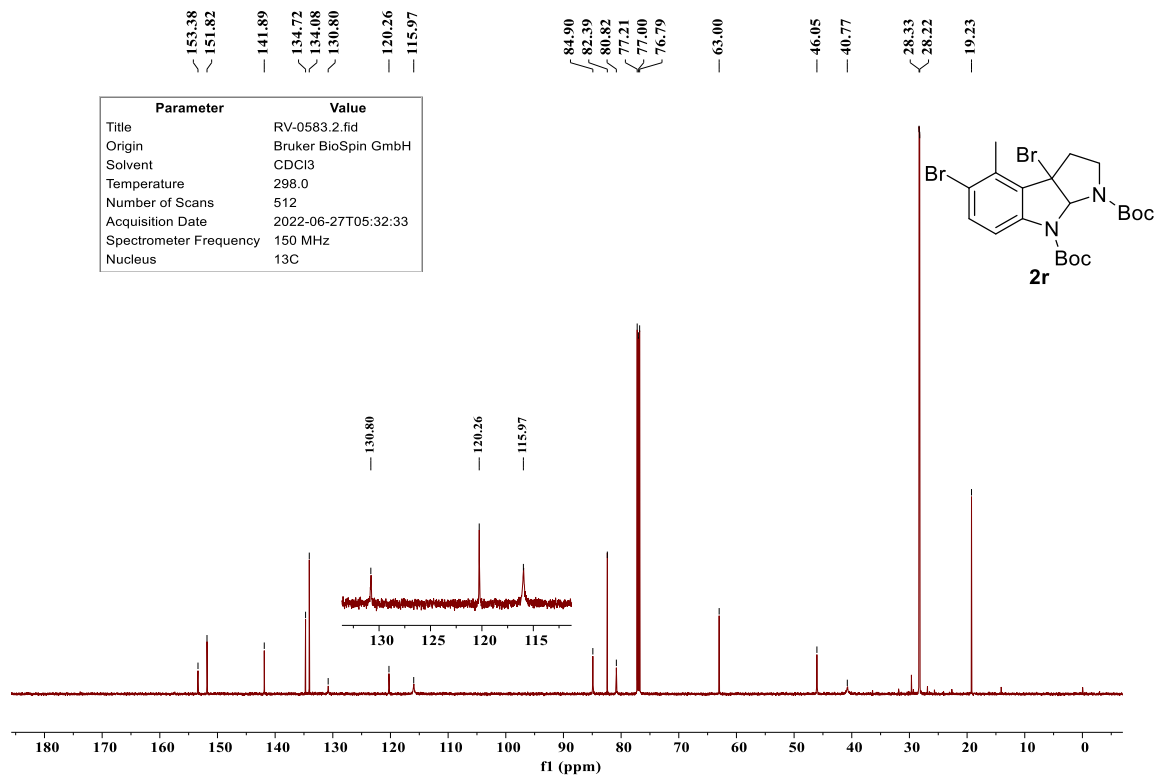

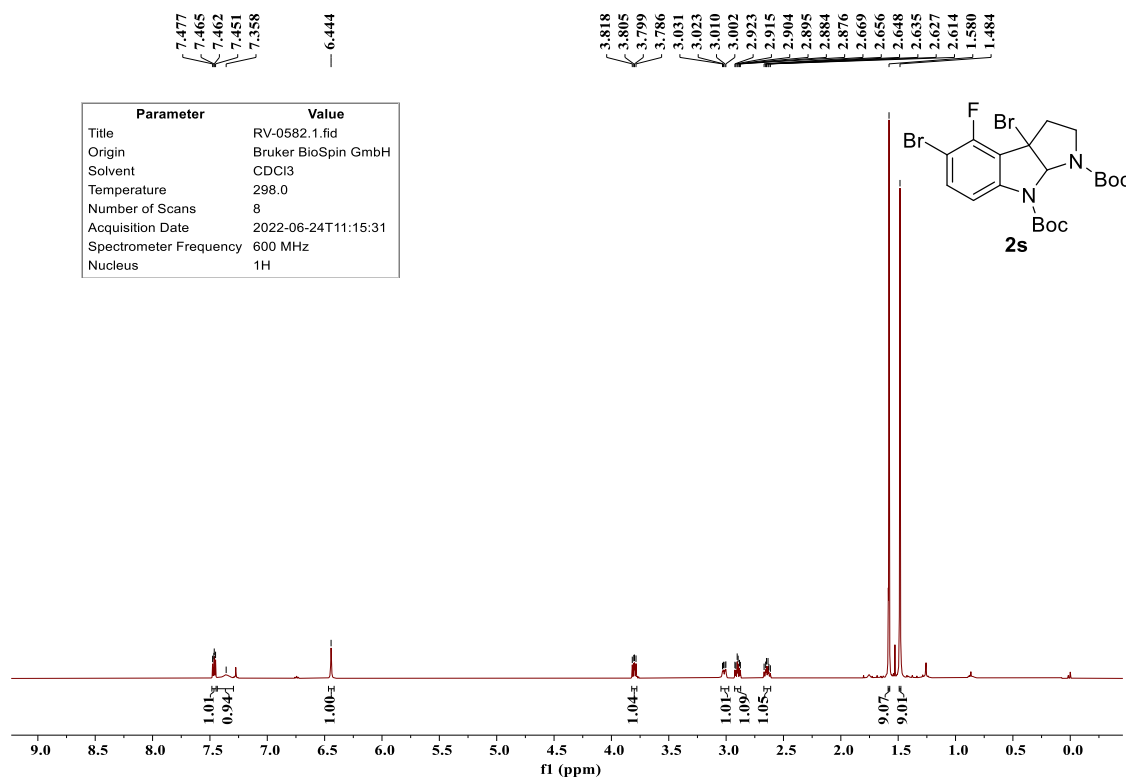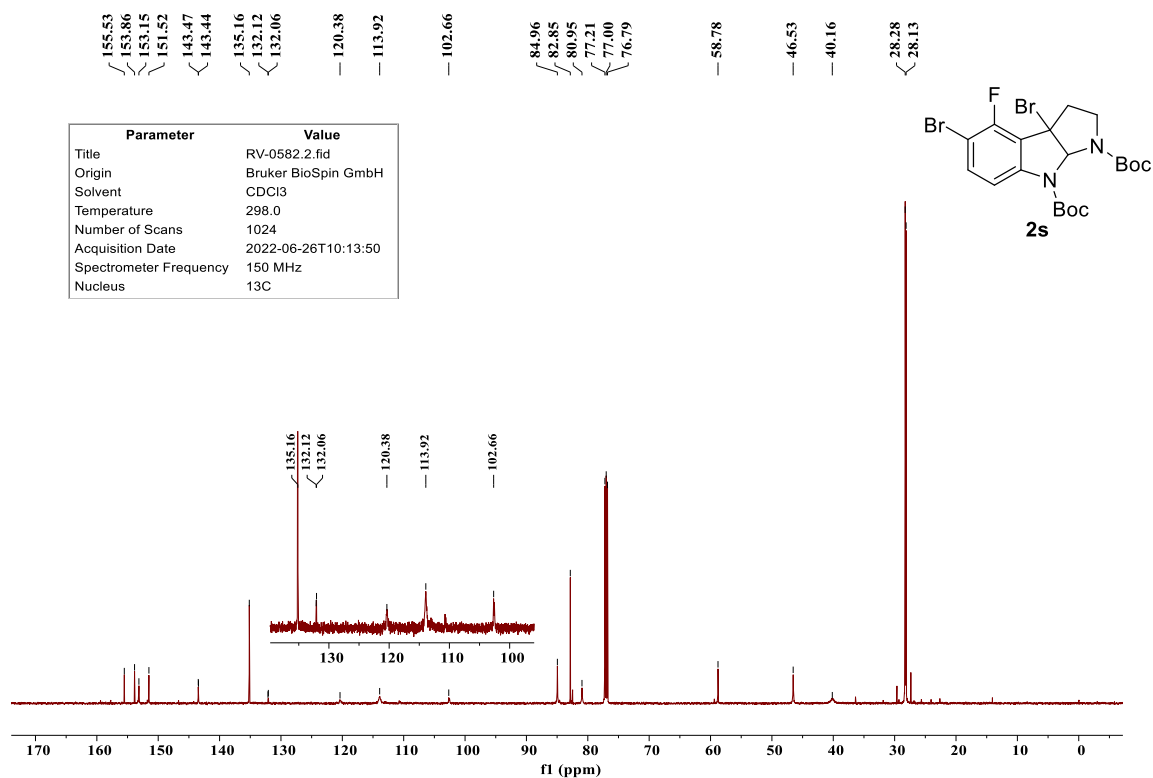

-111.16

| Parameter              | Value               |
|------------------------|---------------------|
| Title                  | RV-0582.3.fid       |
| Origin                 | Bruker BioSpin GmbH |
| Solvent                | CDCl3               |
| Temperature            | 298.0               |
| Number of Scans        | 16                  |
| Acquisition Date       | 2022-06-26T10:15:23 |
| Spectrometer Frequency | 565 MHz             |
| Nucleus                | <sup>19</sup> F     |

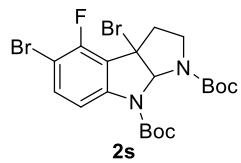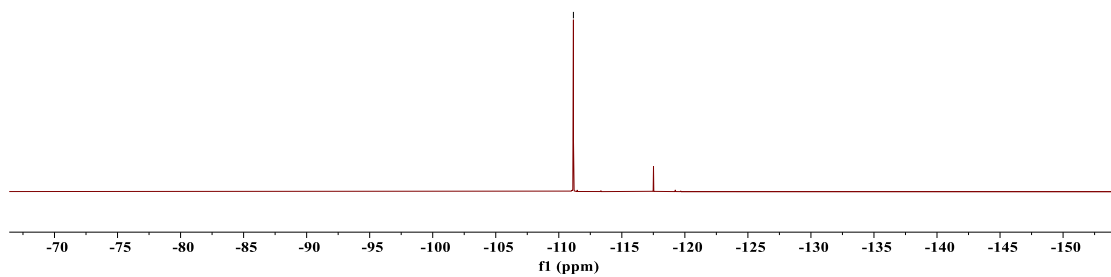

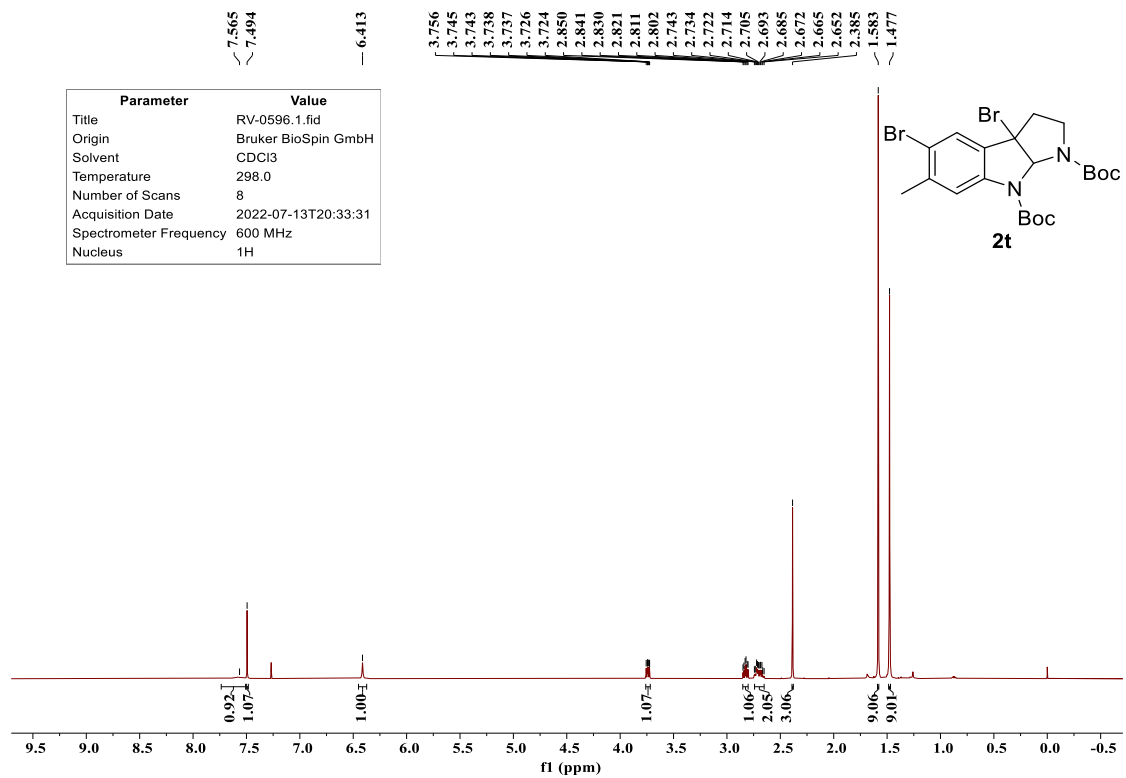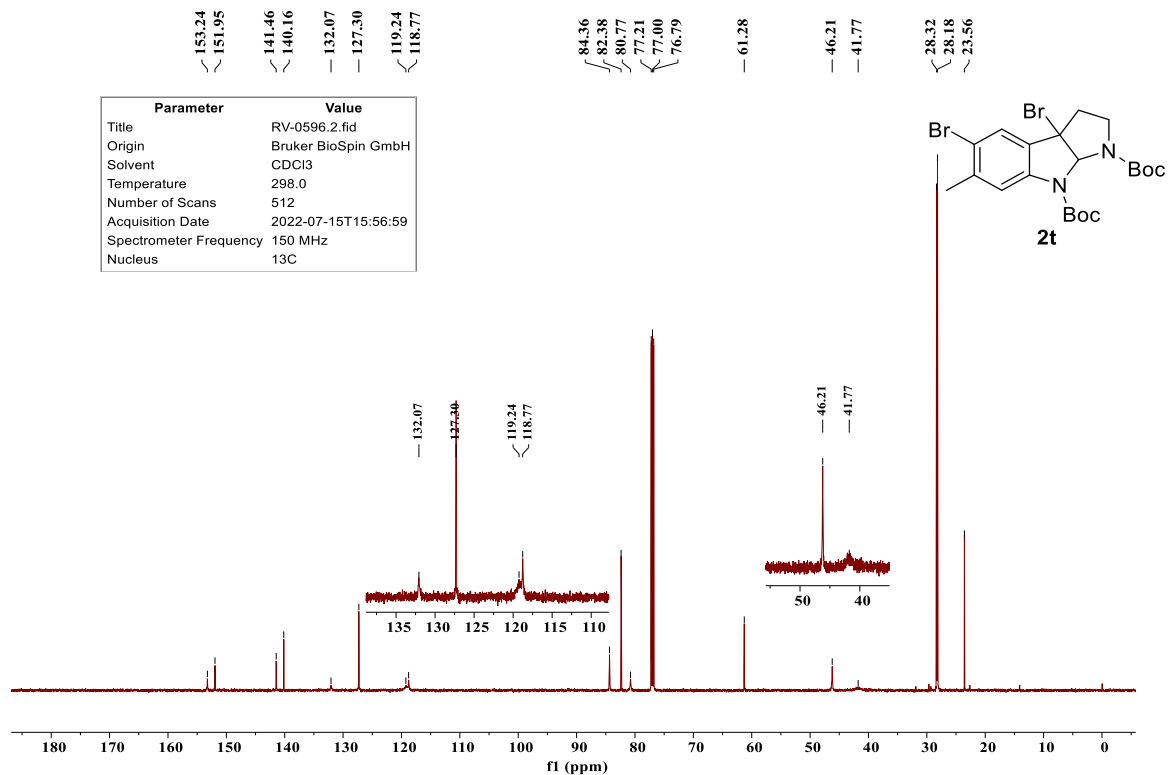

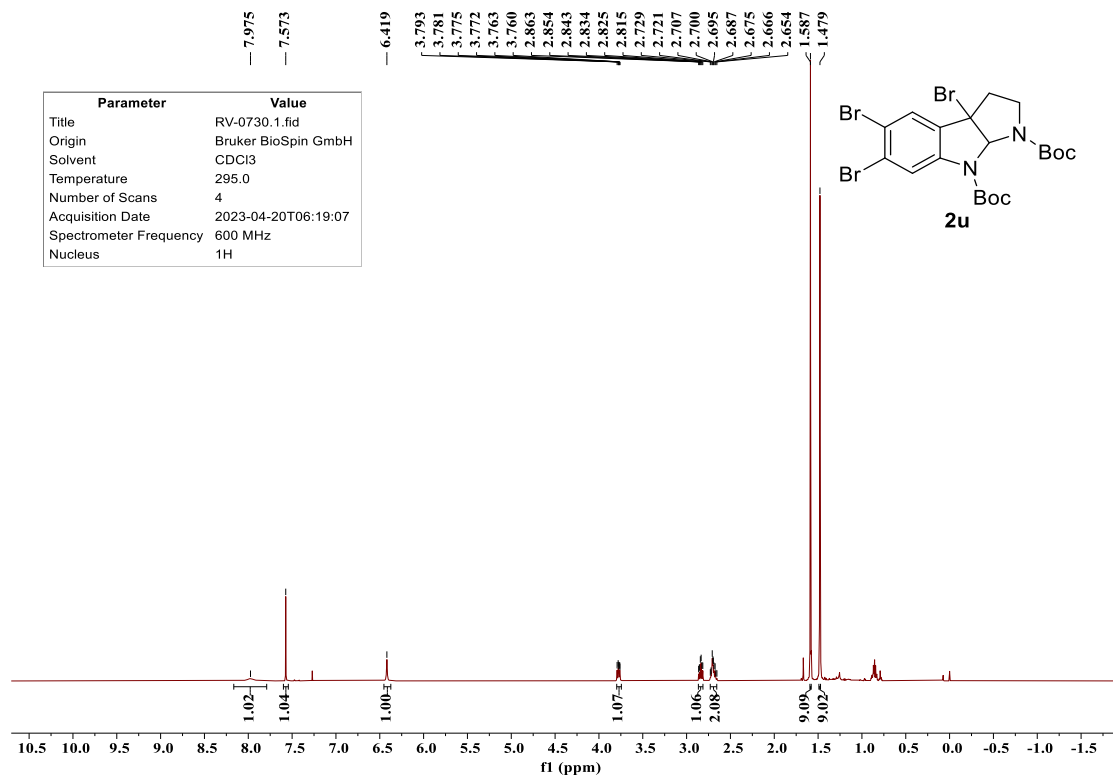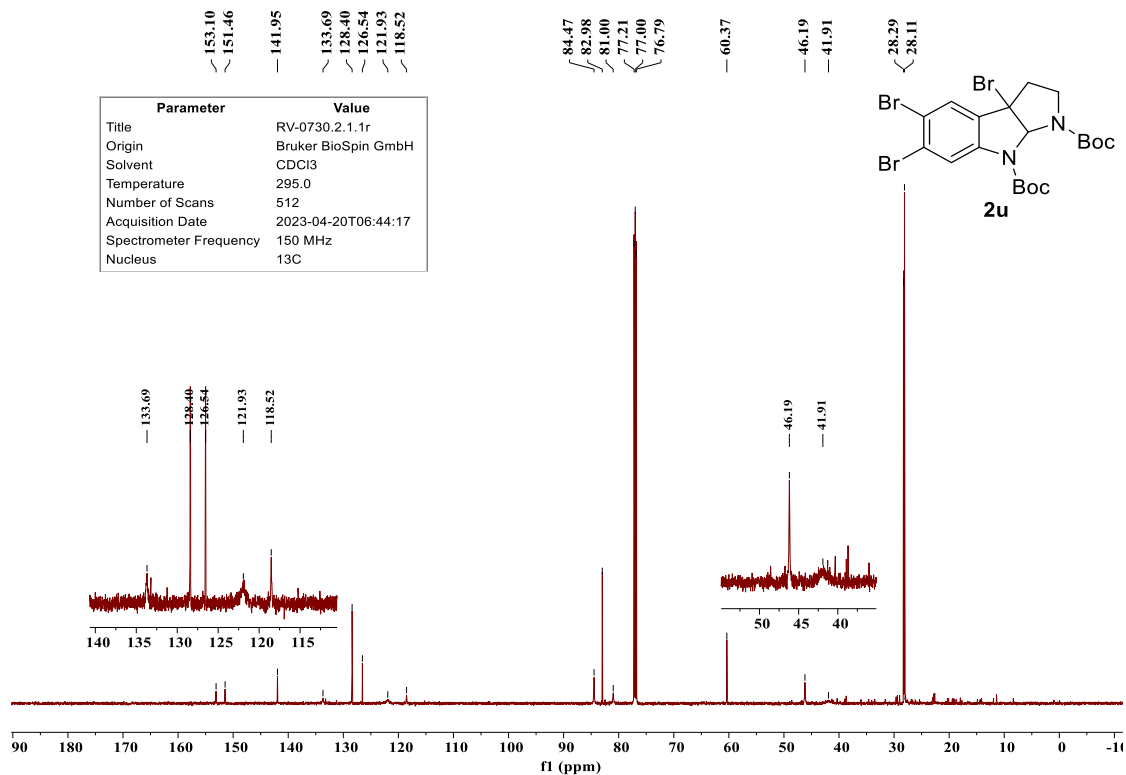

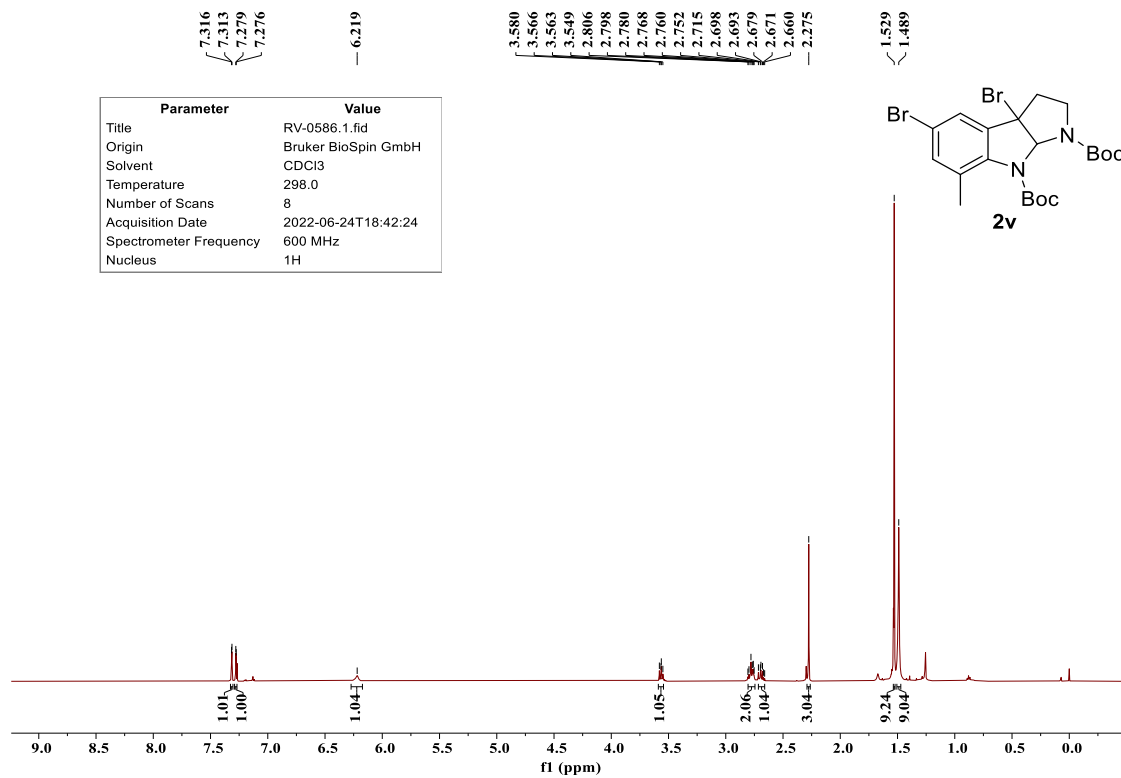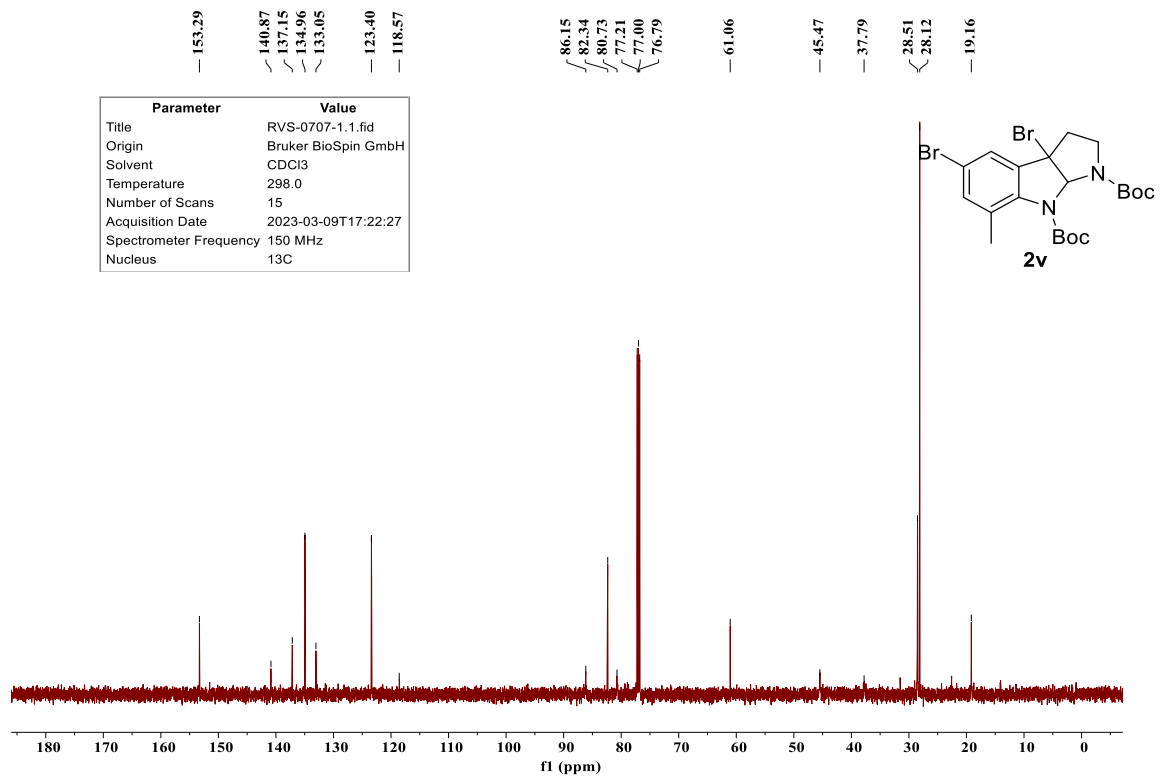

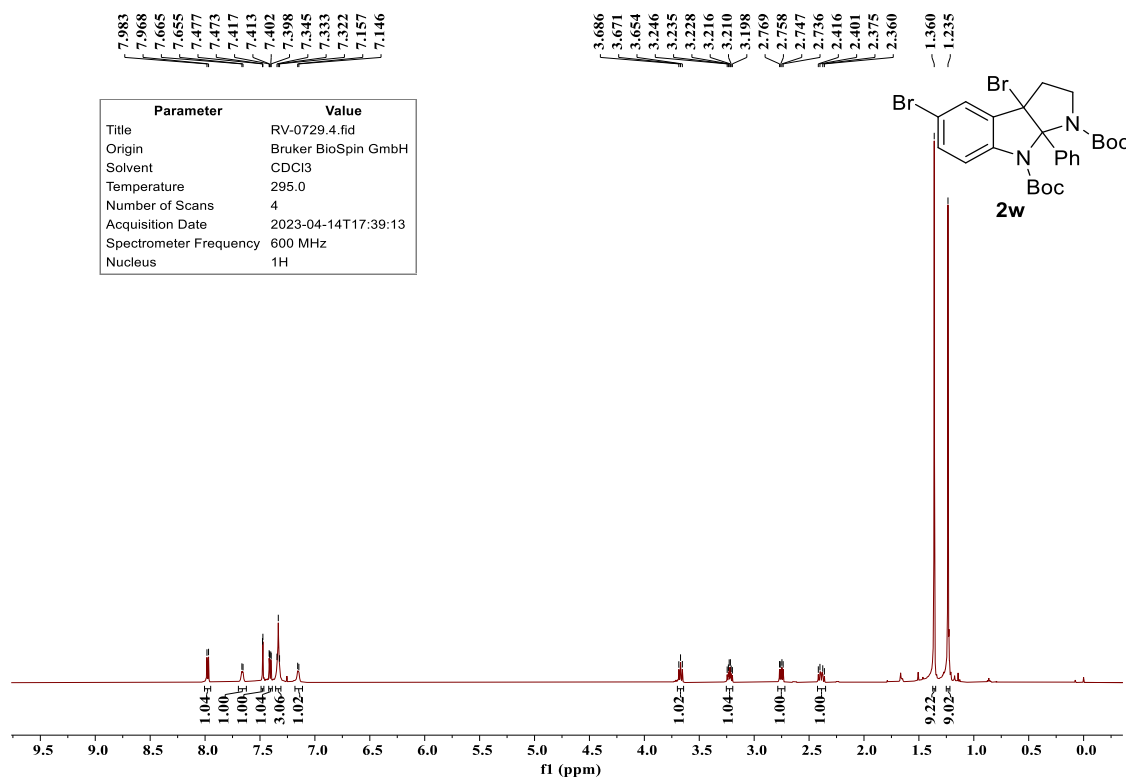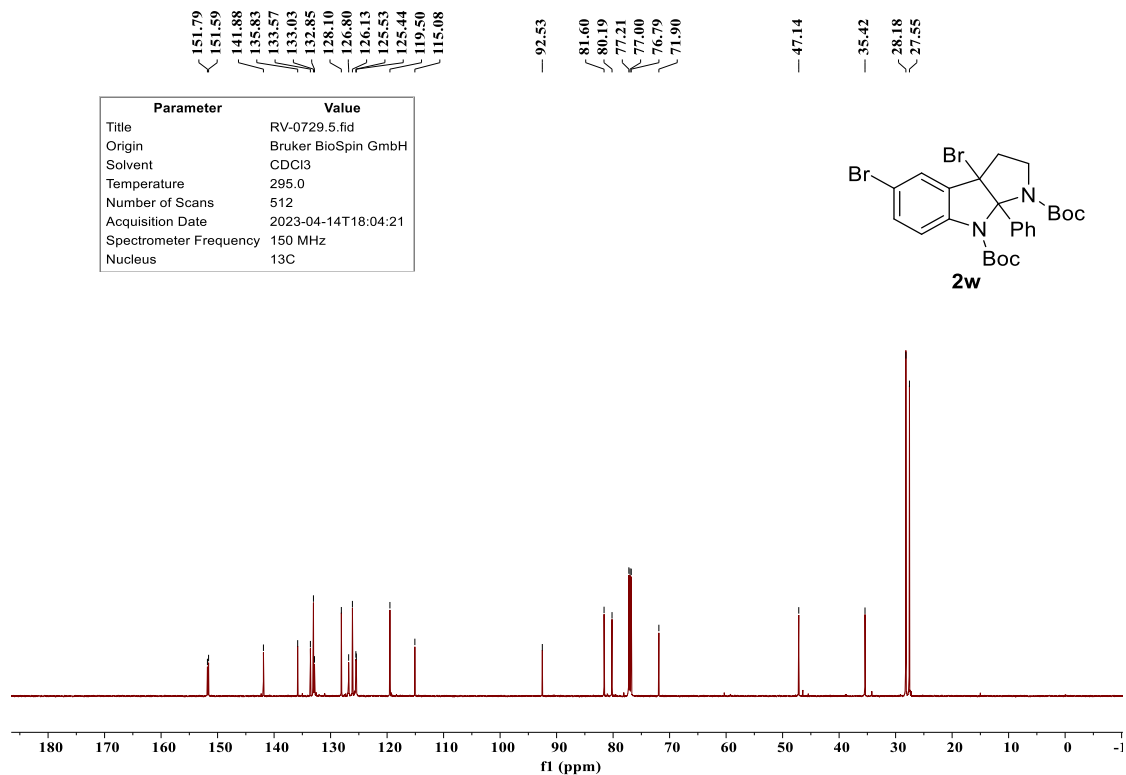

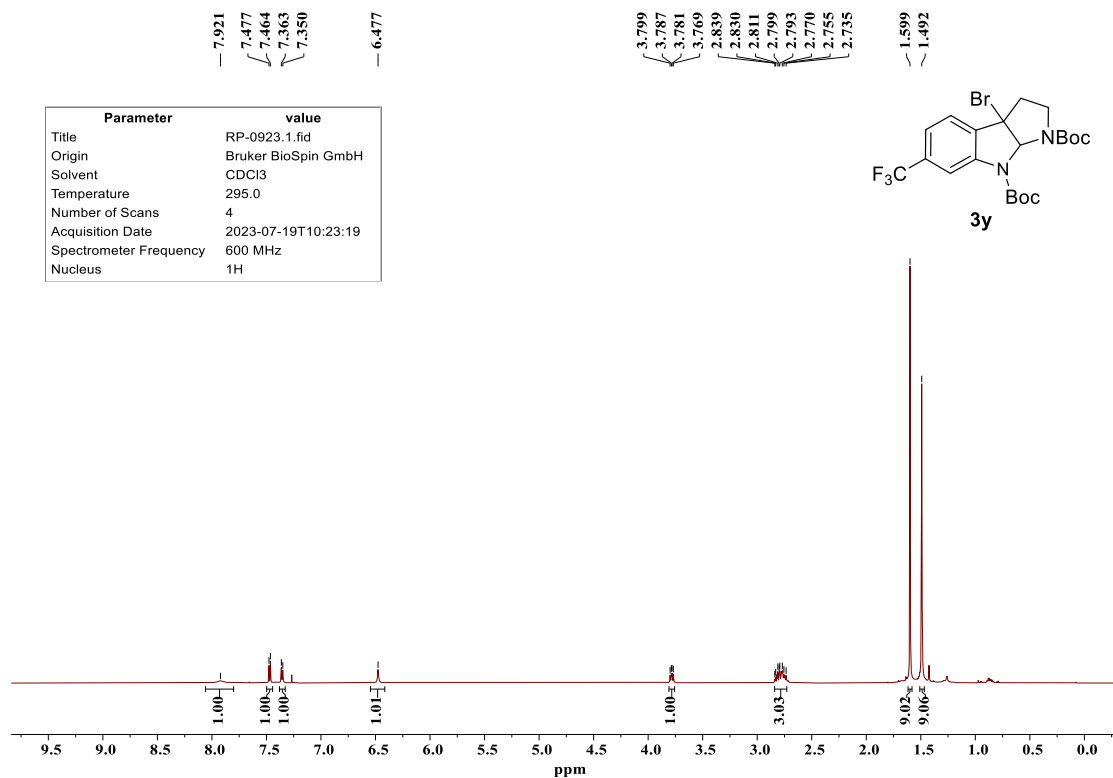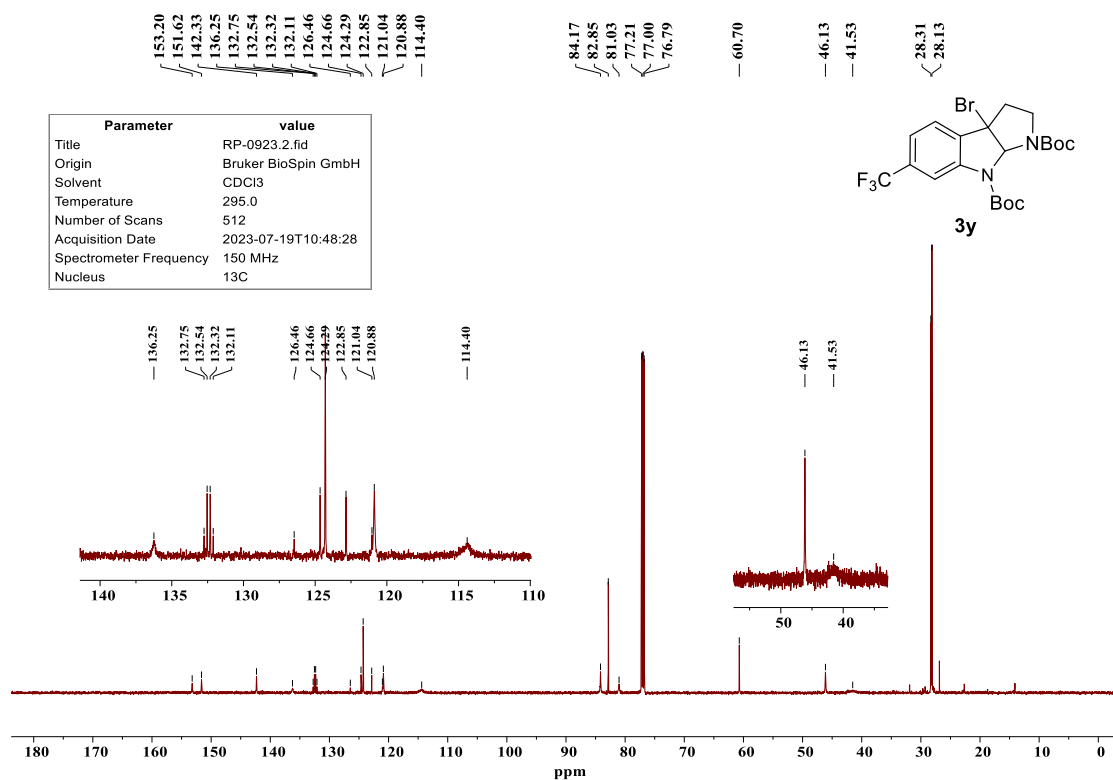



| Parameter              | Value               |
|------------------------|---------------------|
| Title                  | RP-0923-F.1.fid     |
| Origin                 | Bruker BioSpin GmbH |
| Solvent                | CDCl3               |
| Temperature            | 295.2               |
| Number of Scans        | 16                  |
| Acquisition Date       | 2023-07-21T13:59:11 |
| Spectrometer Frequency | 565 MHz             |
| Nucleus                | 19F                 |

-62.66

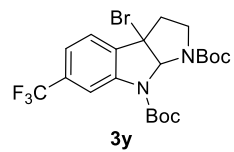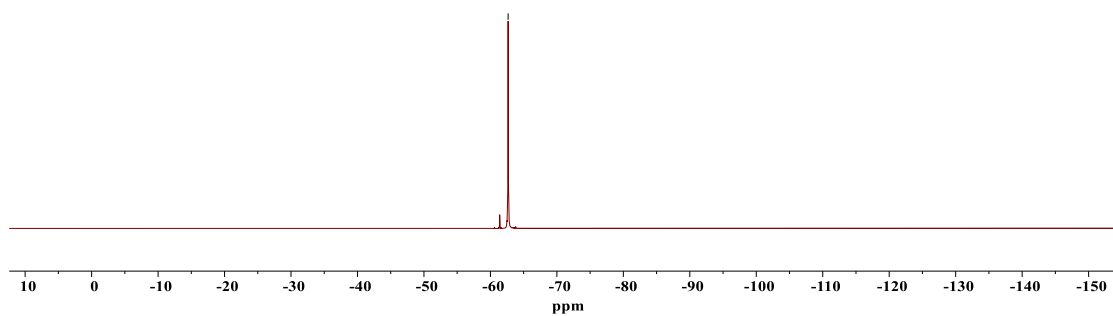

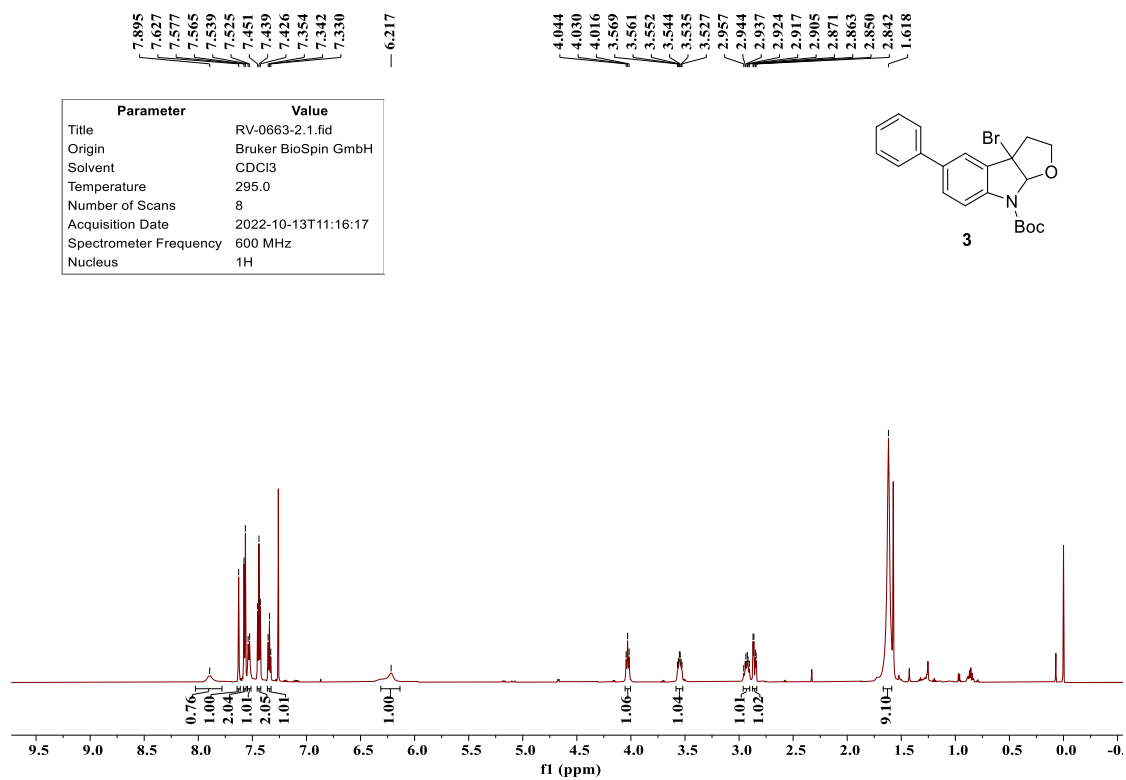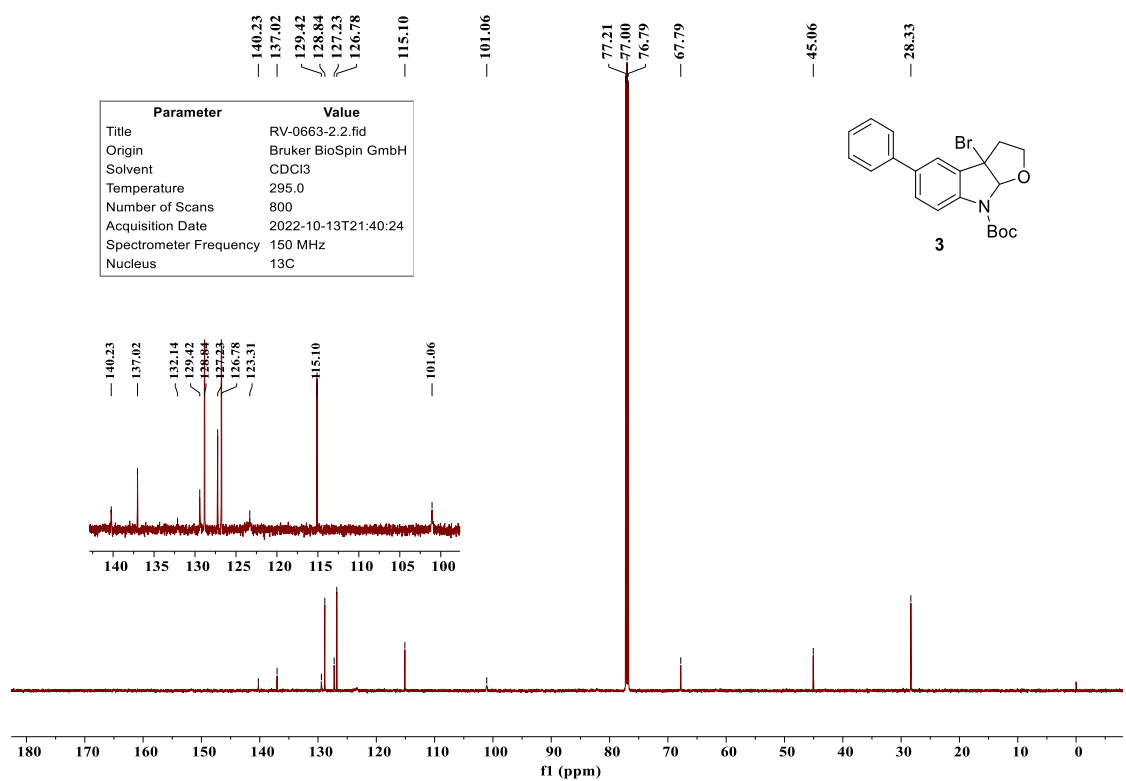

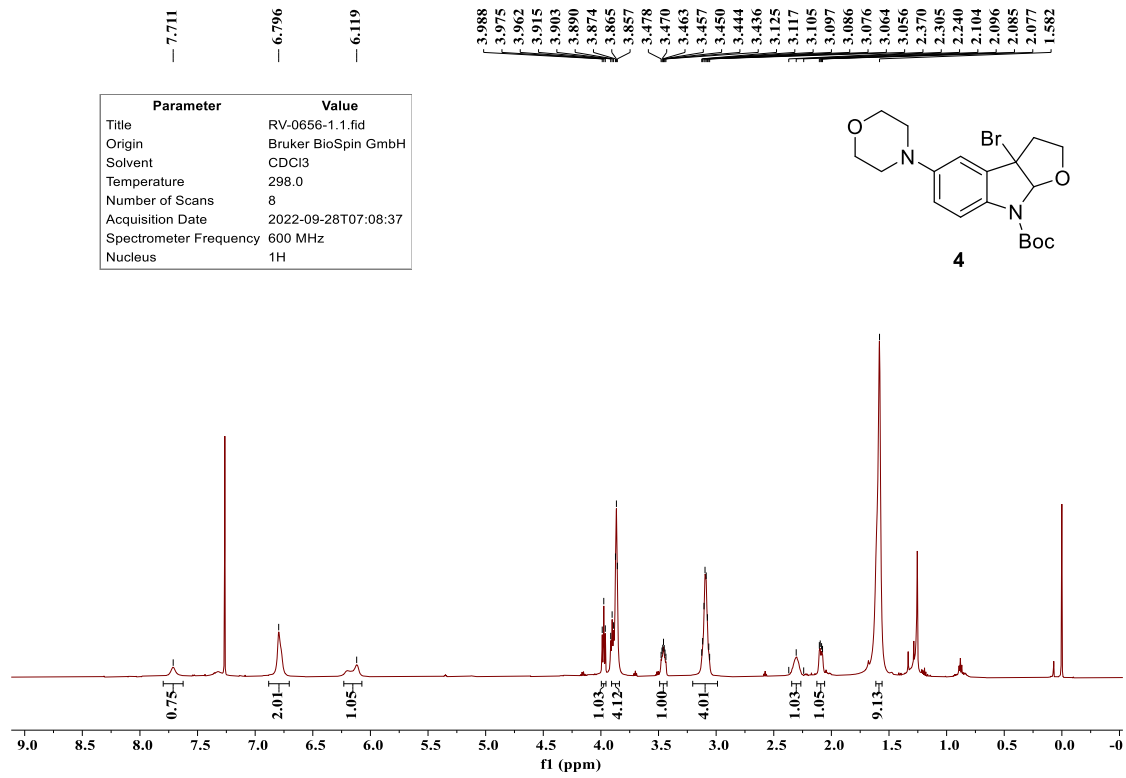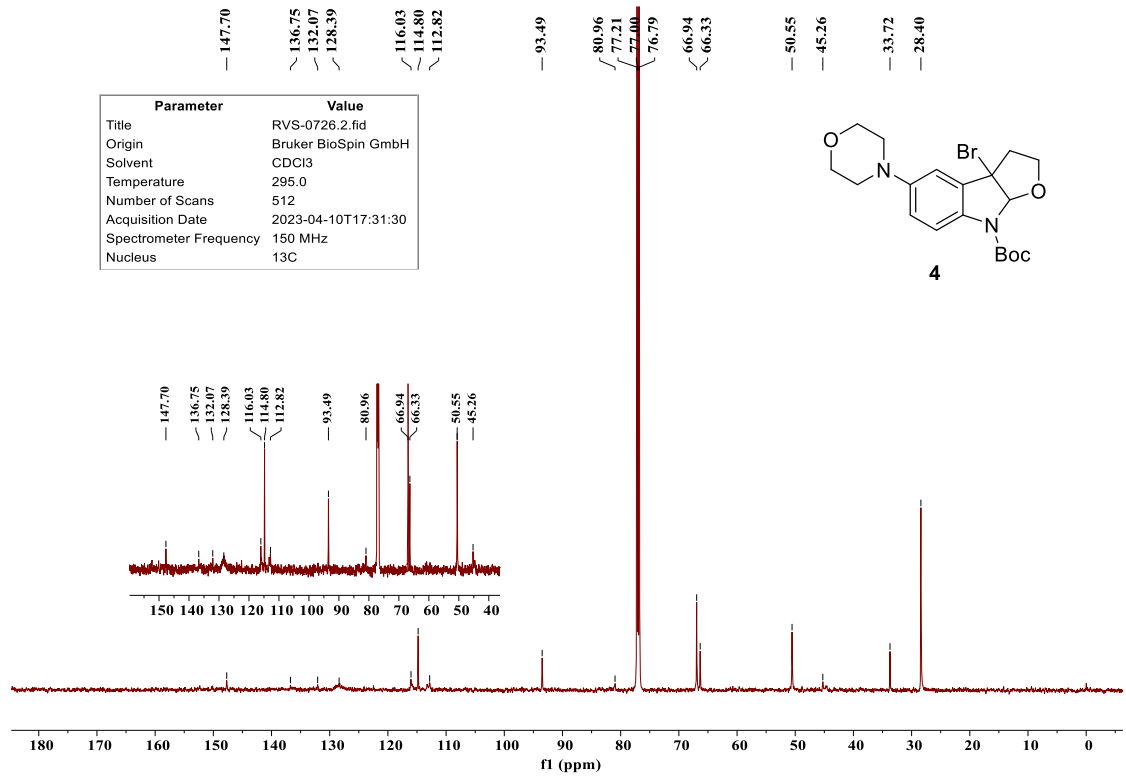

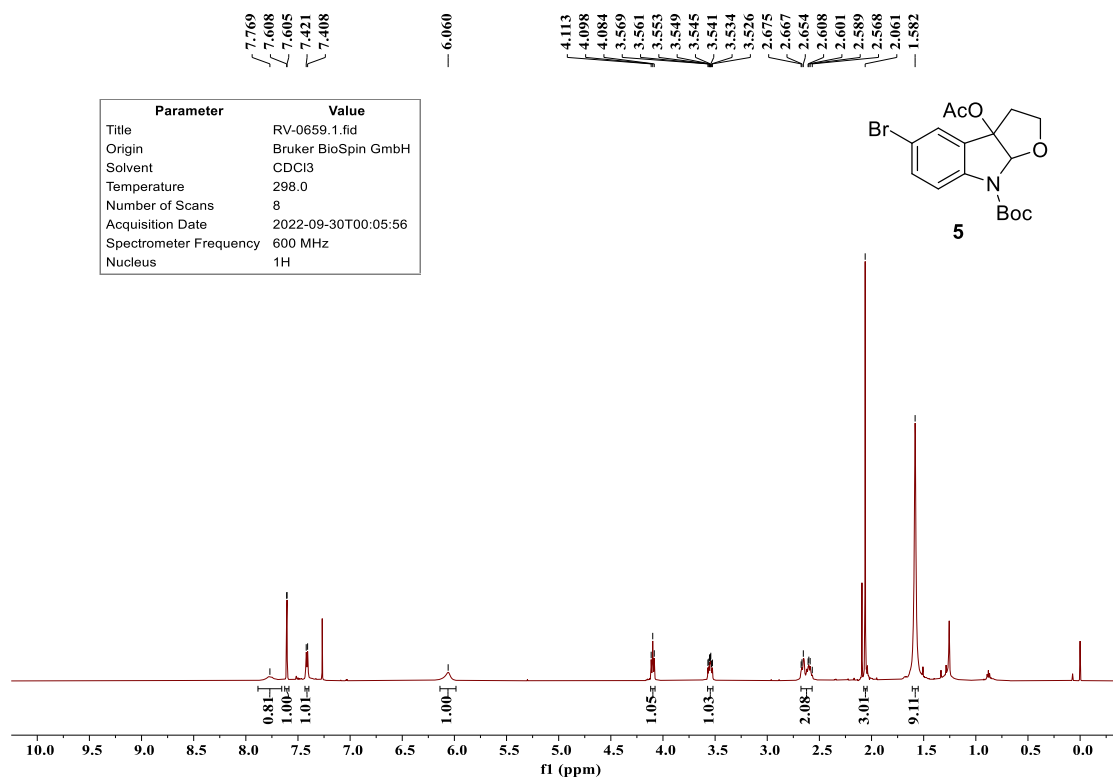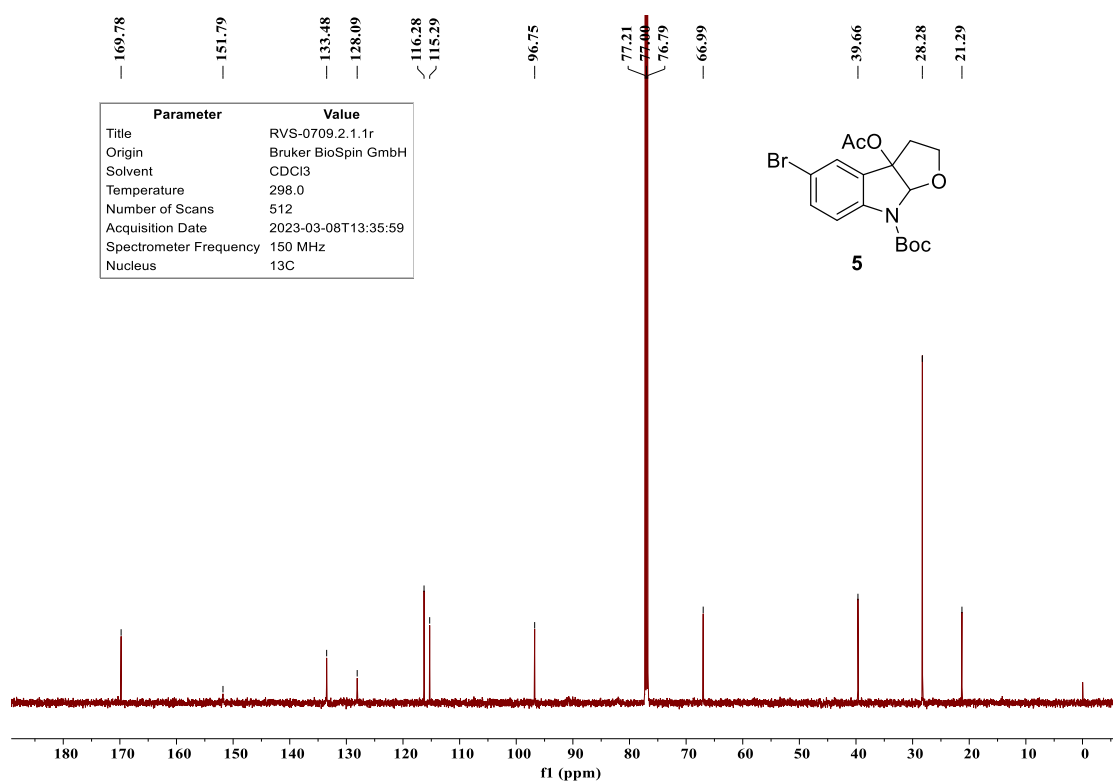

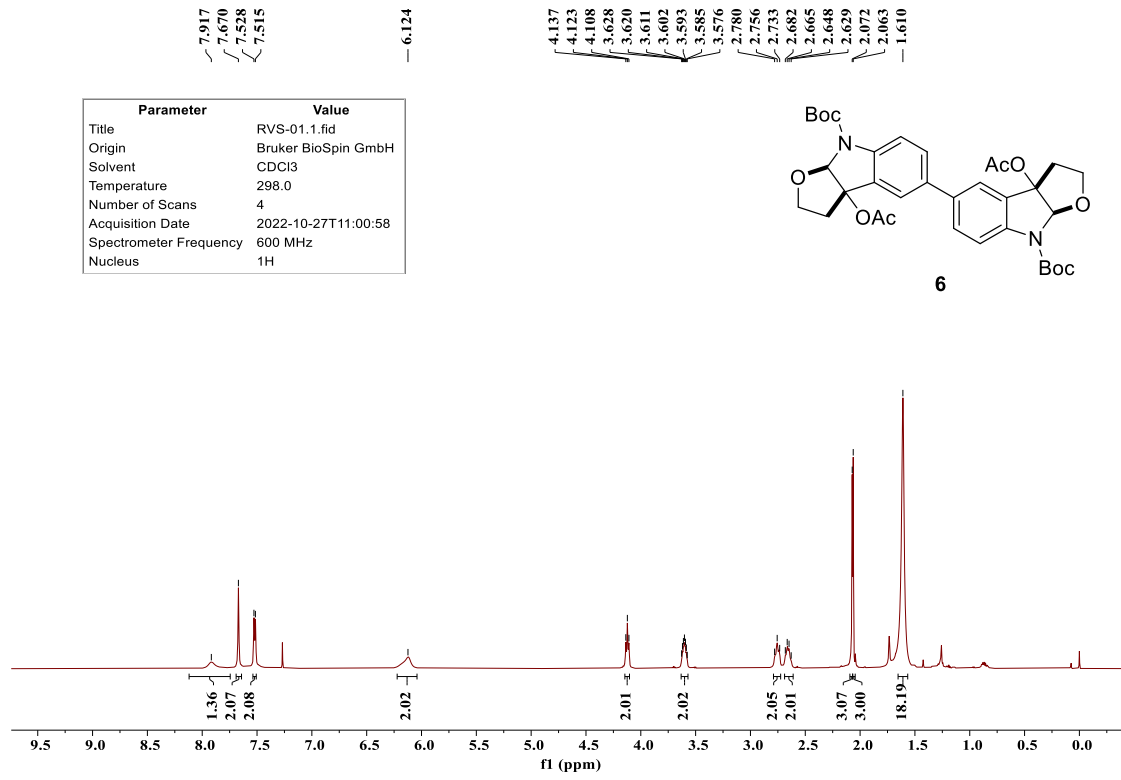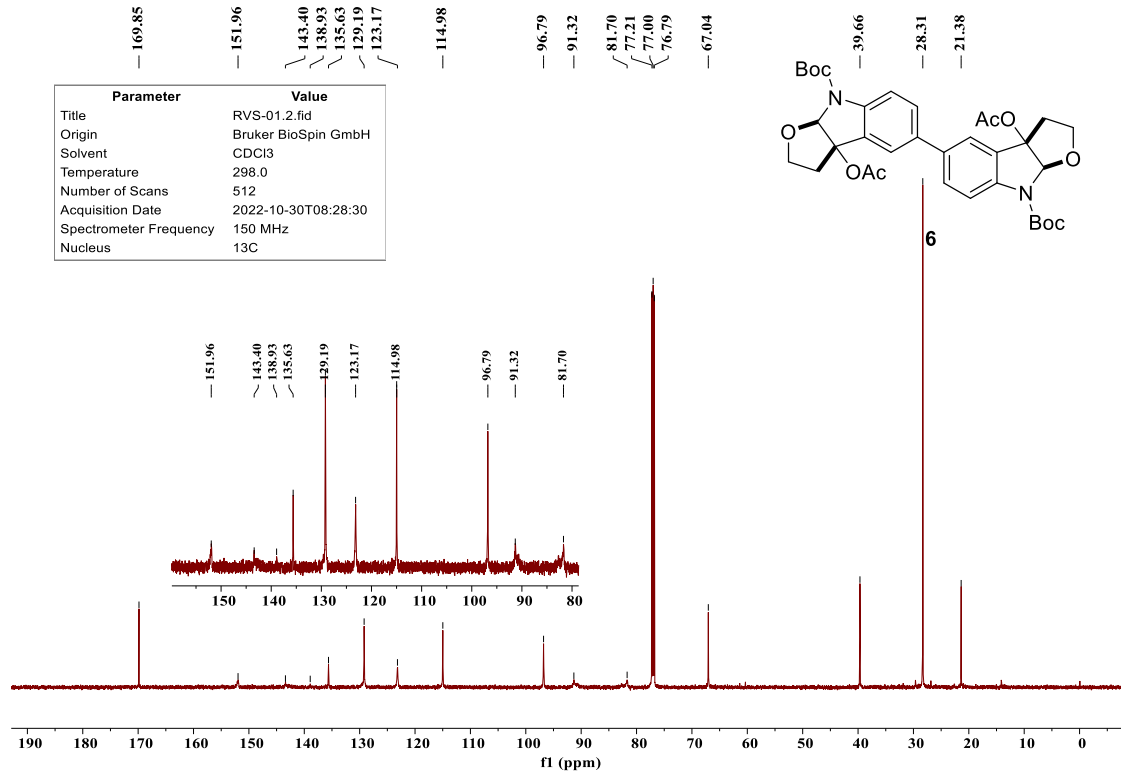

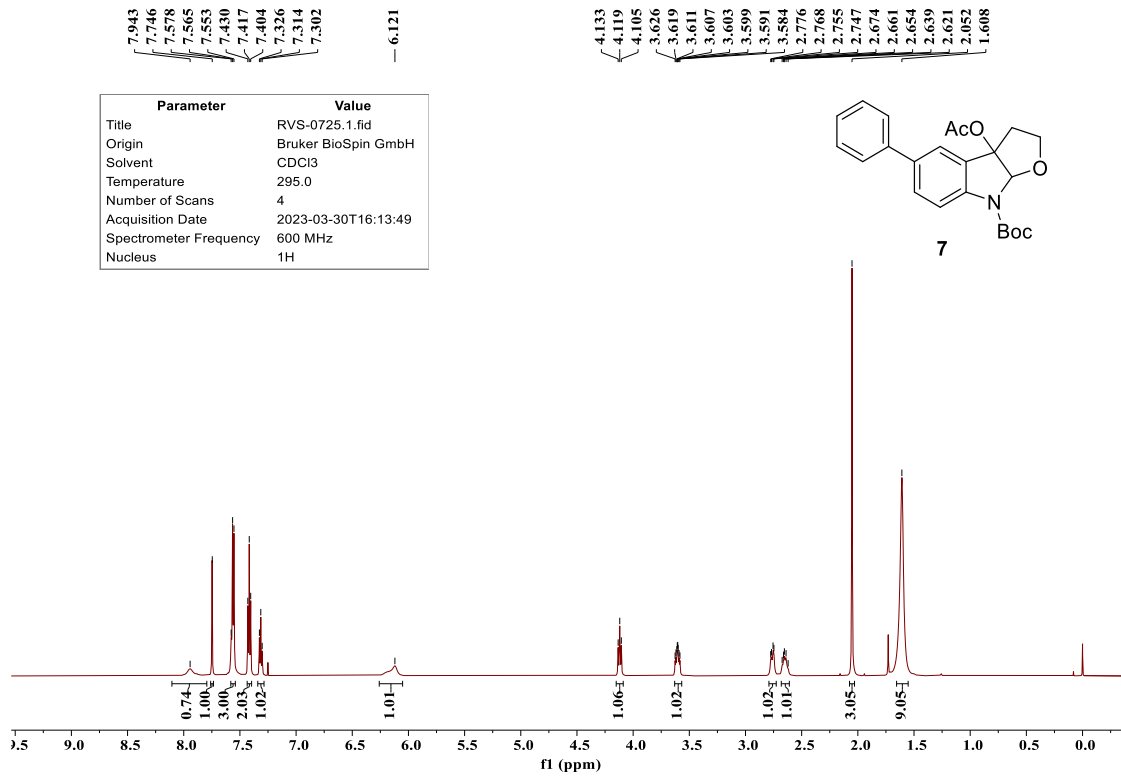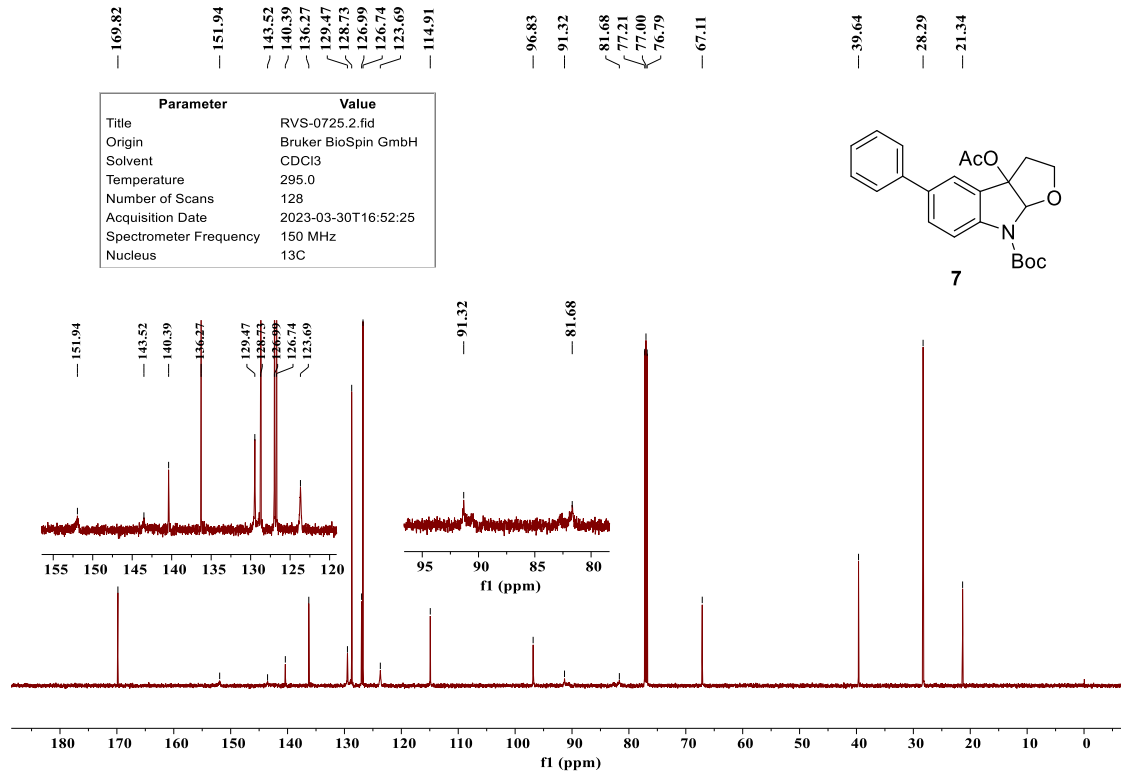

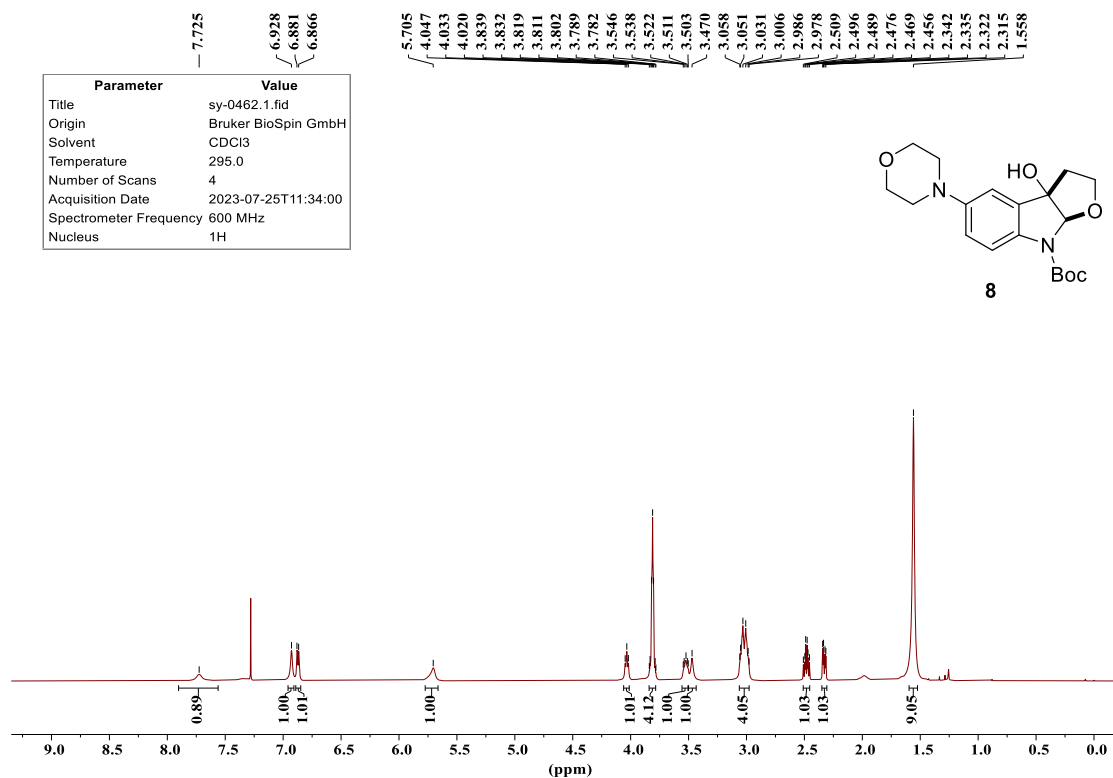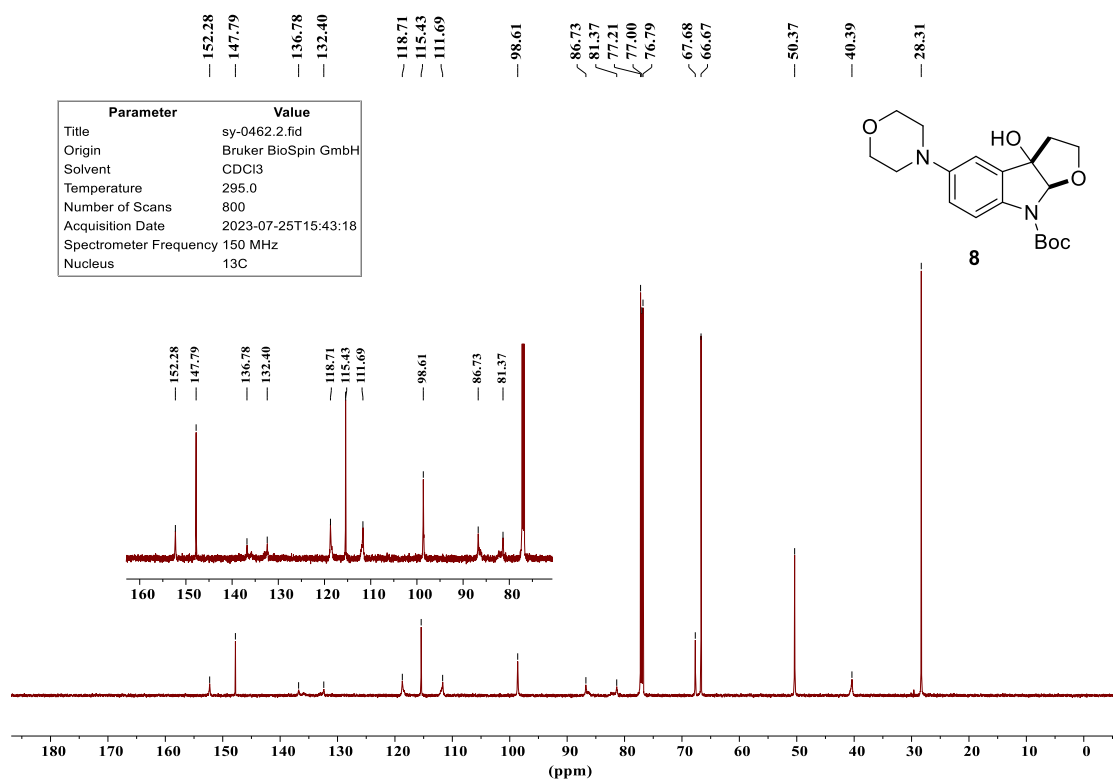

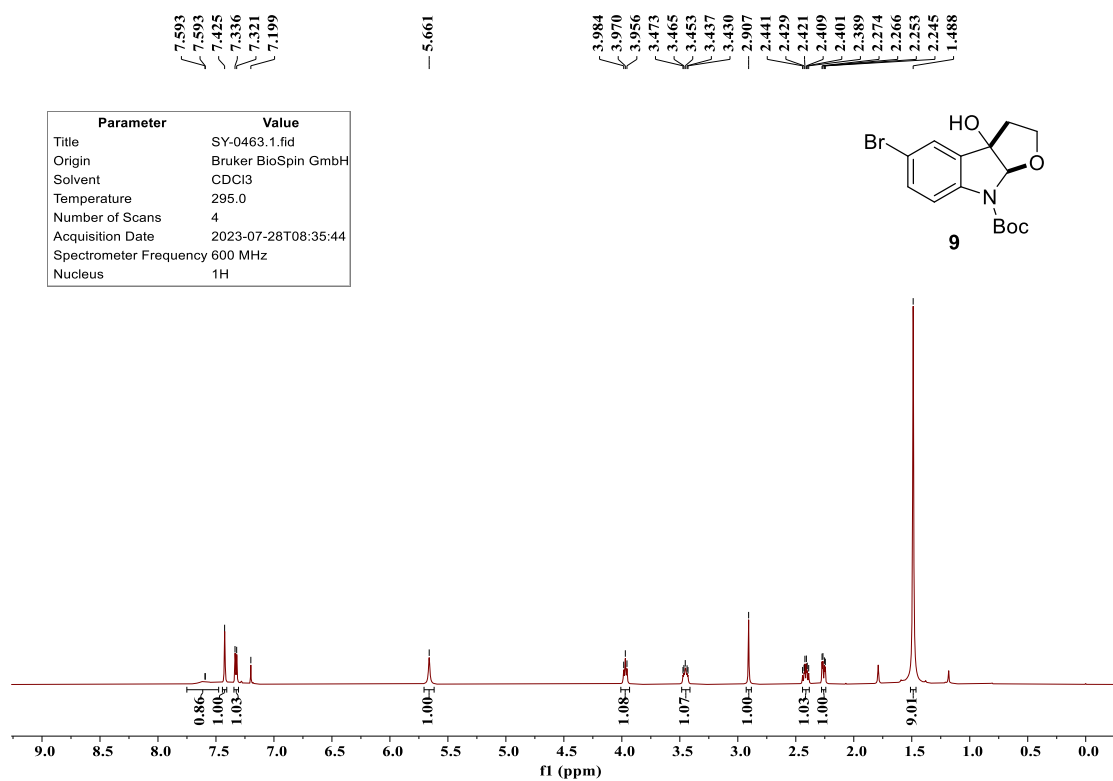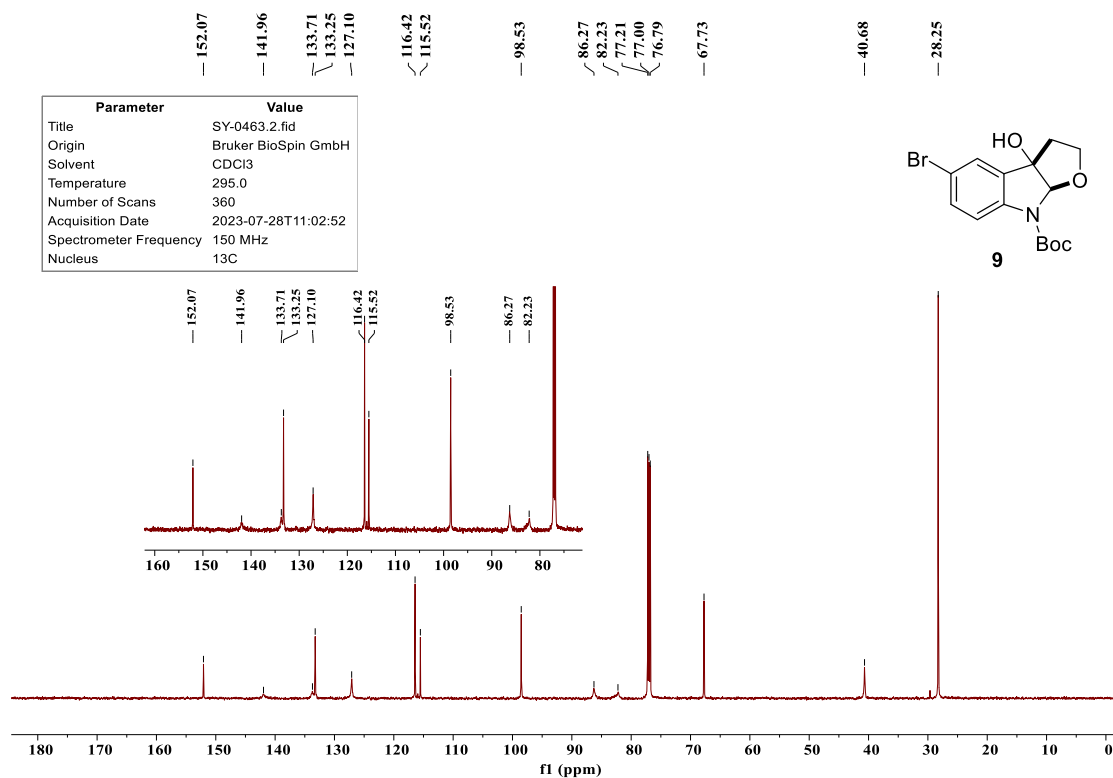



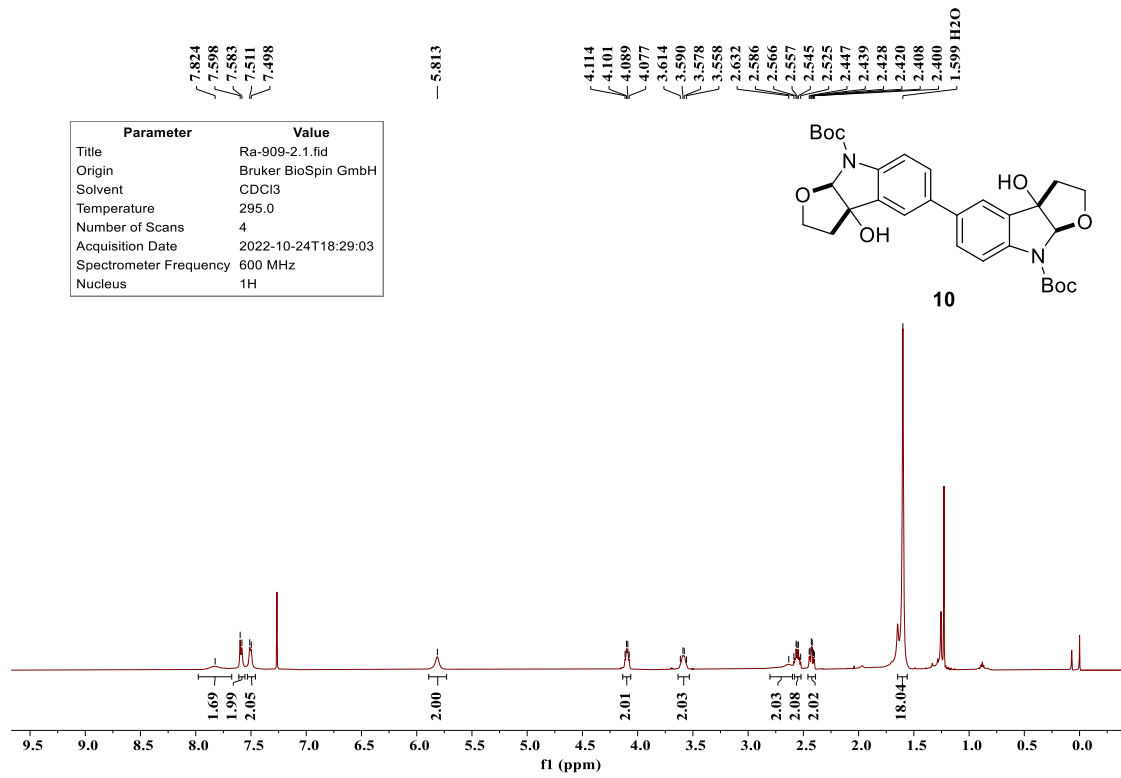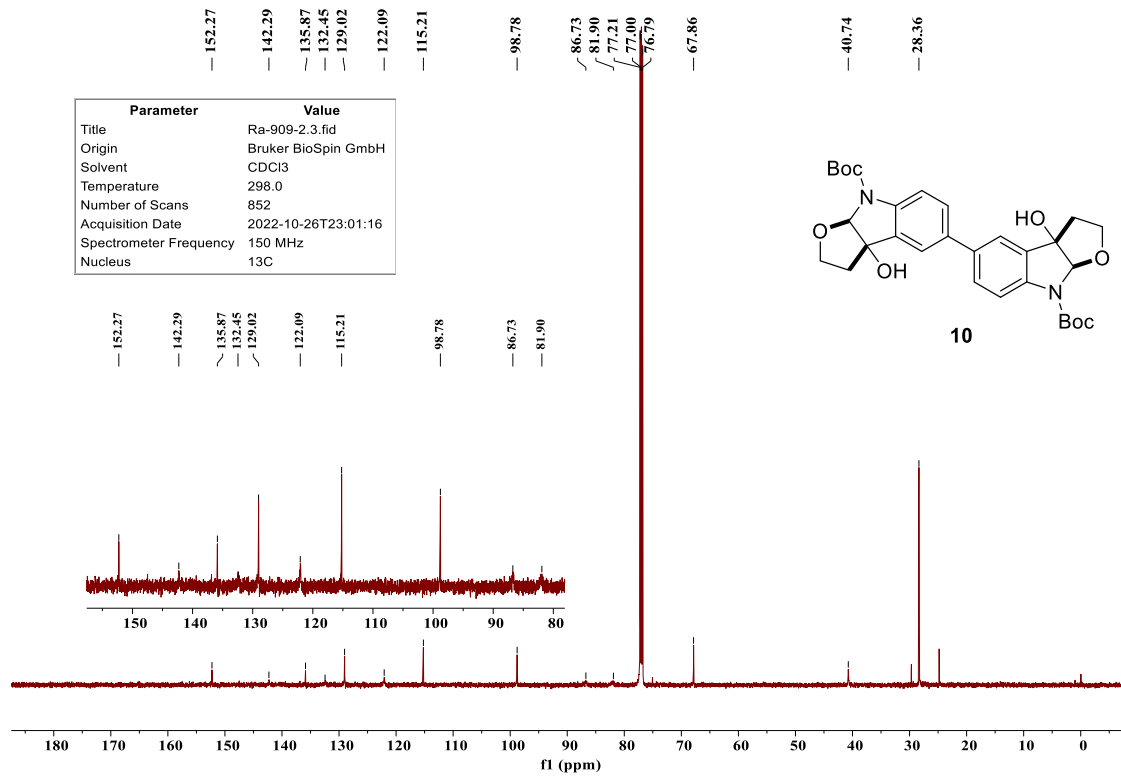

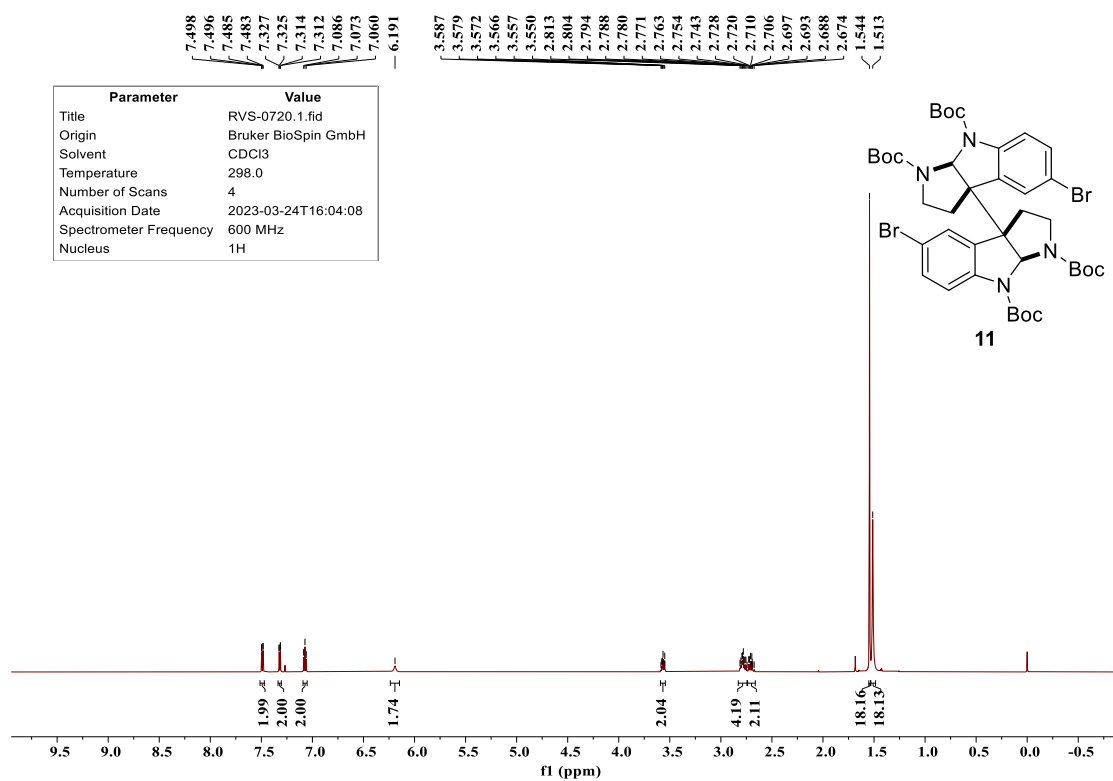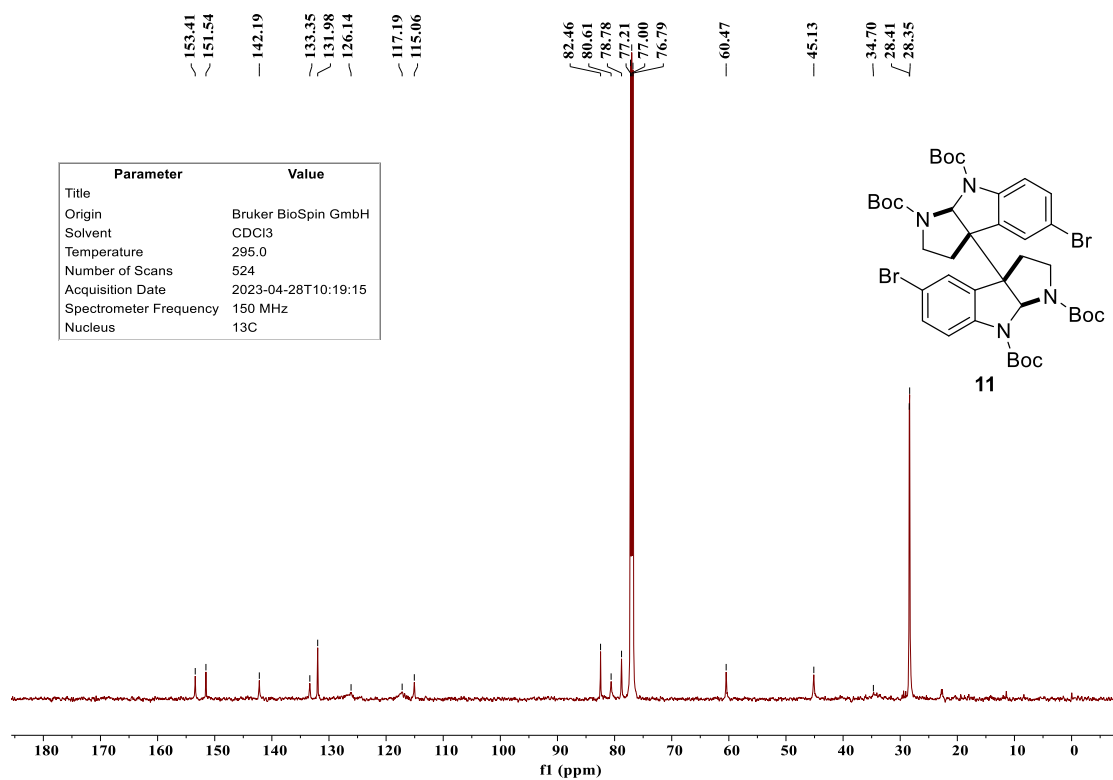

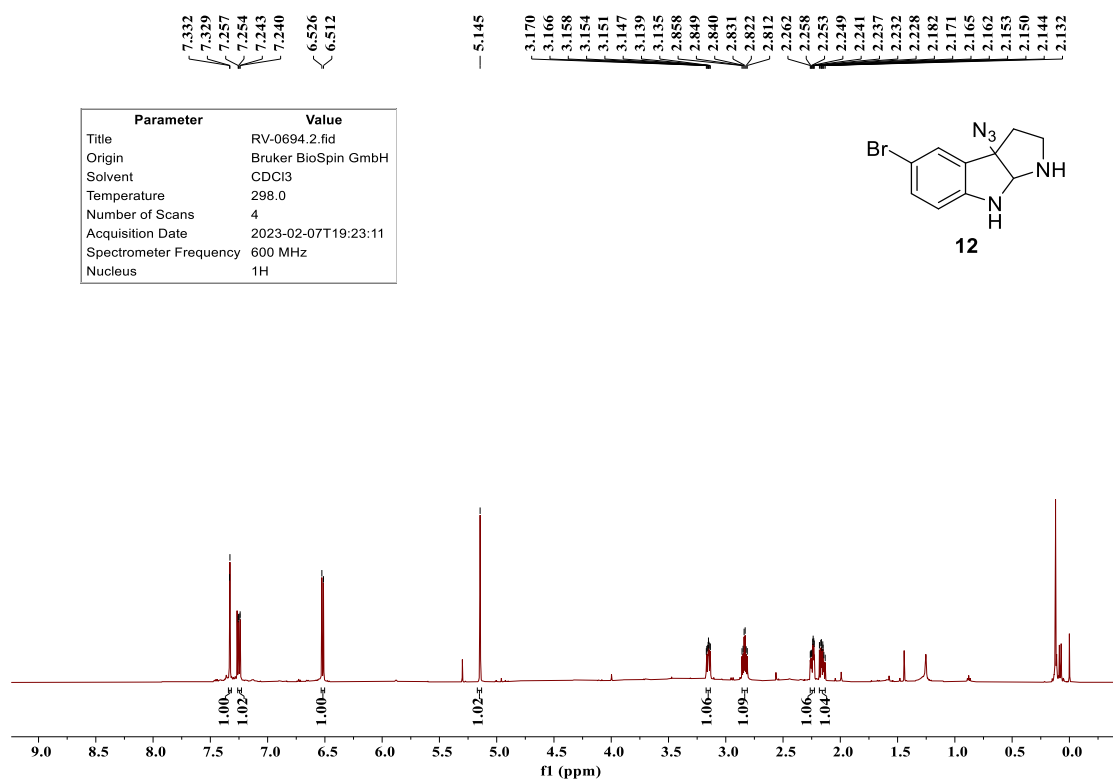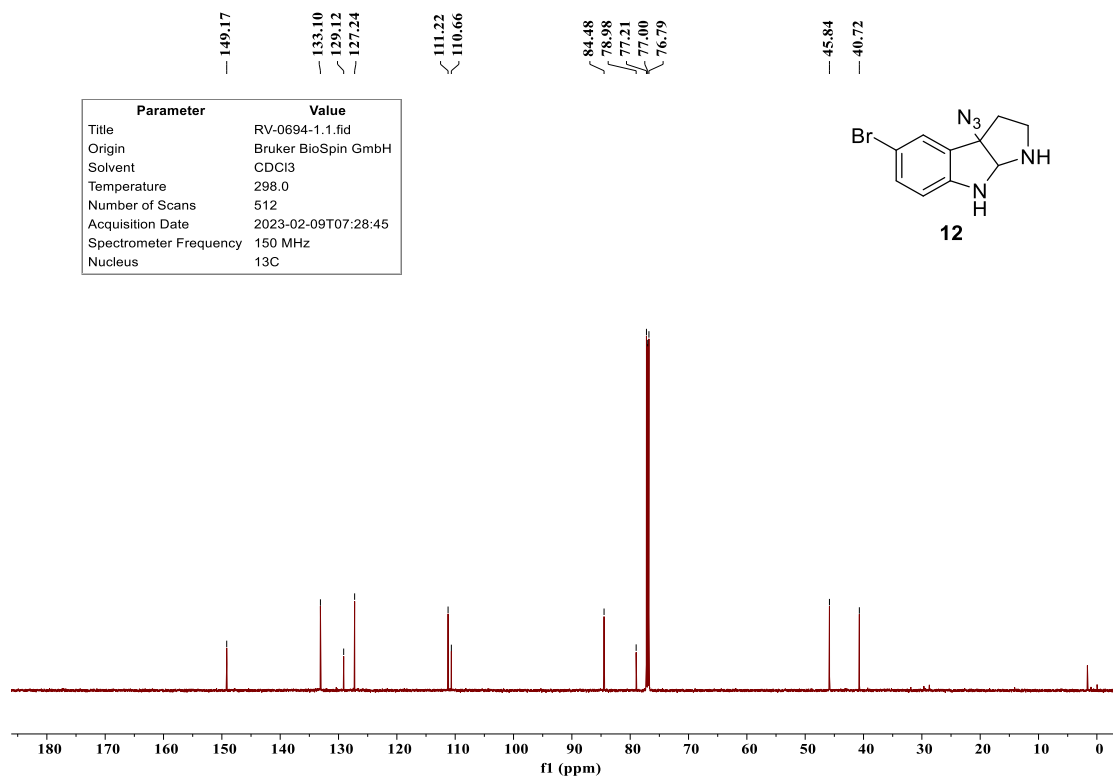

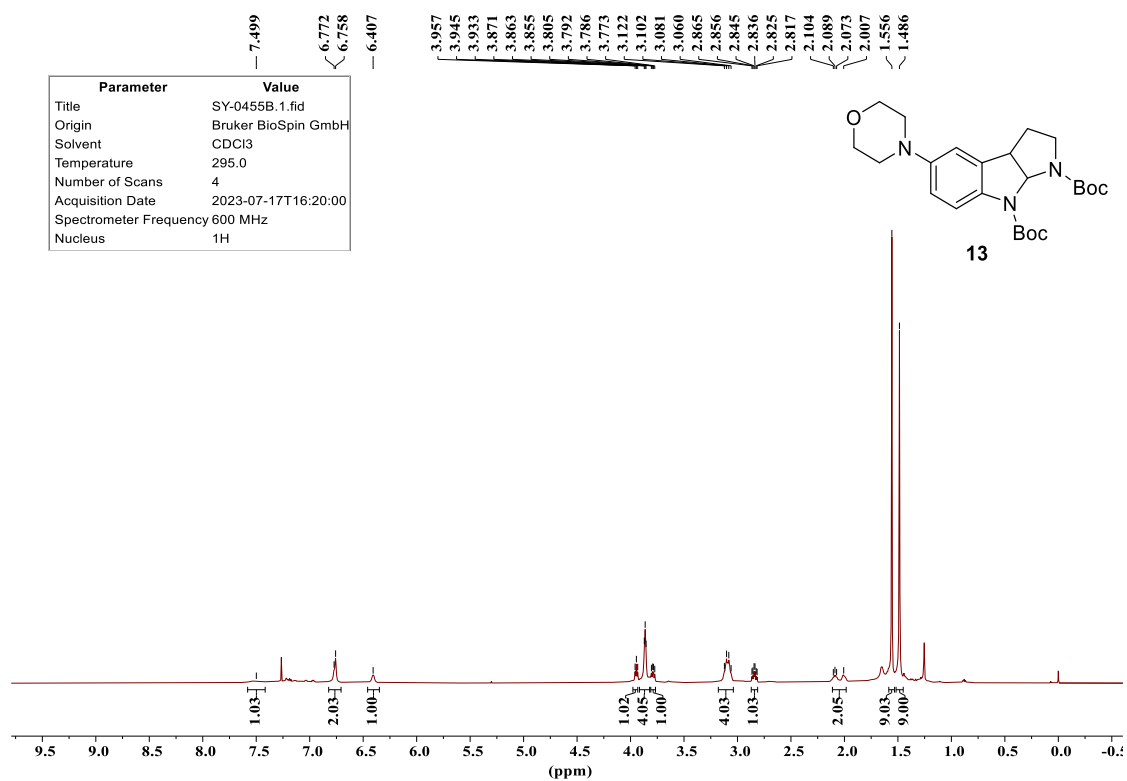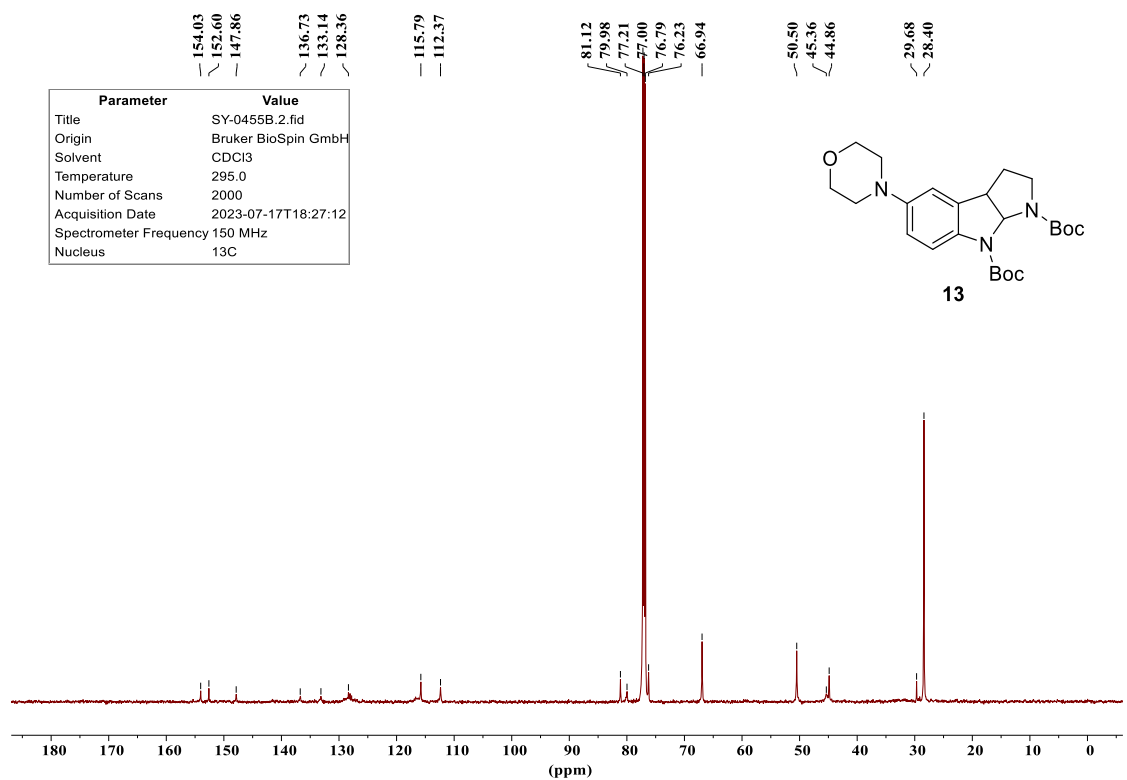

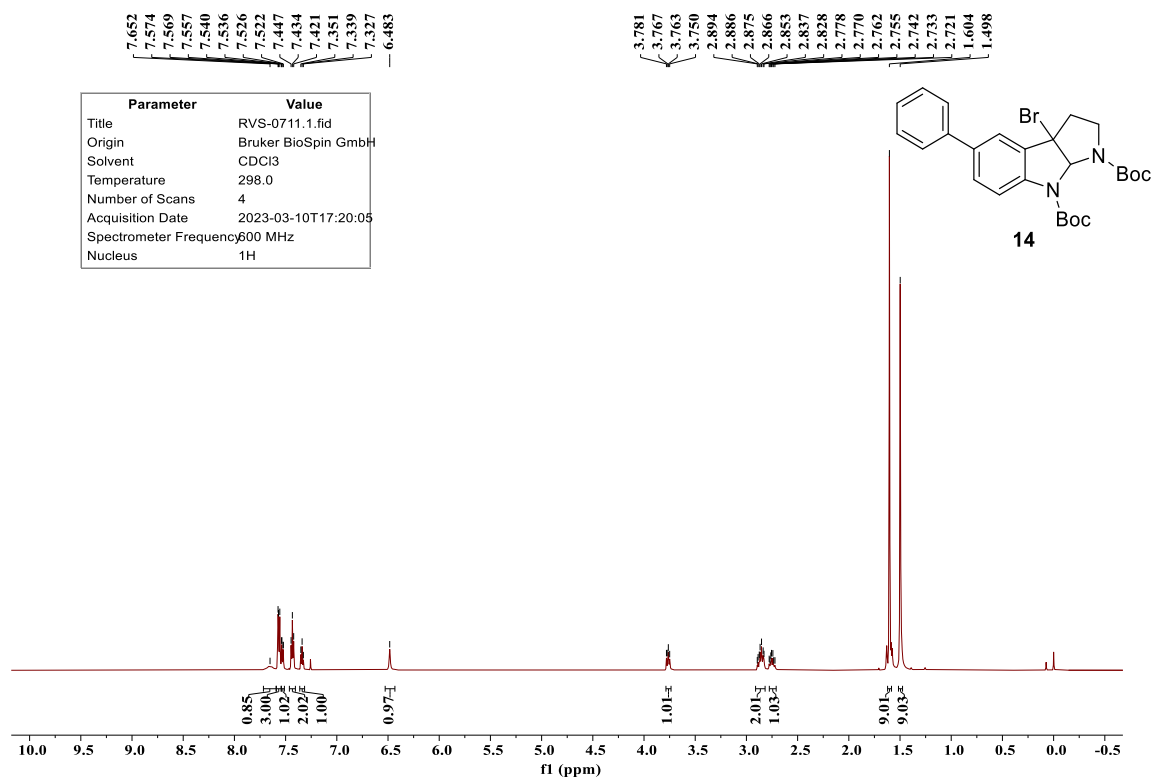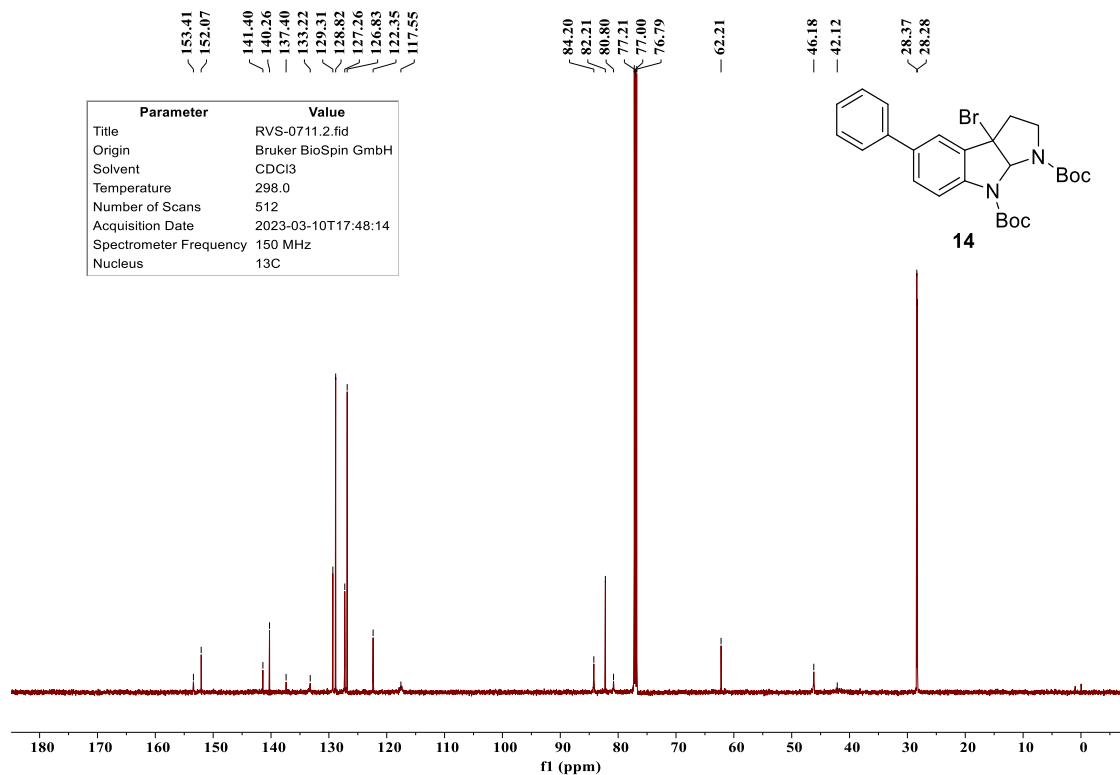

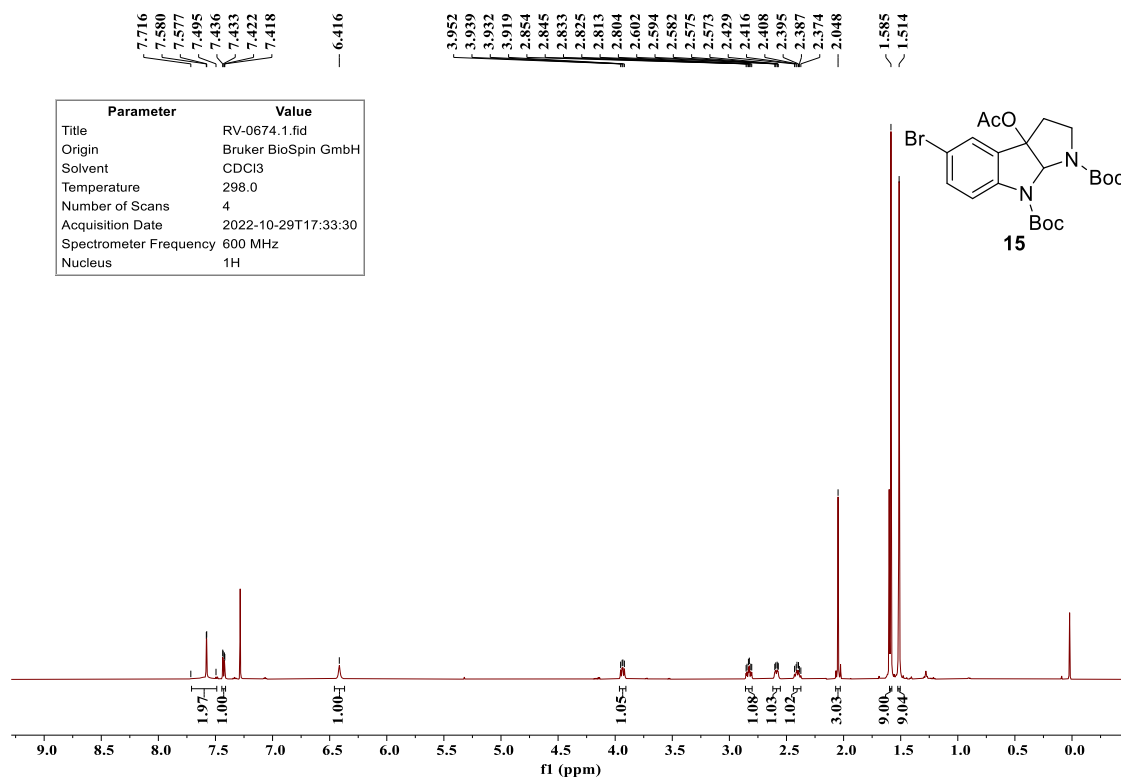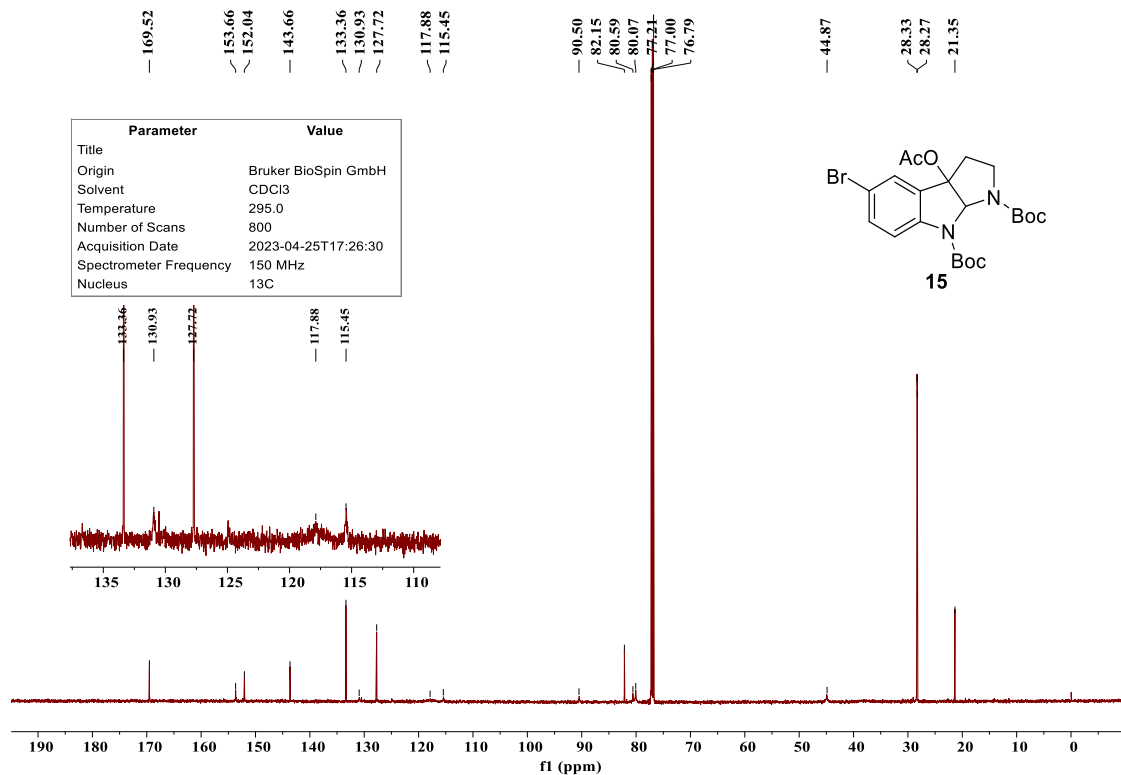

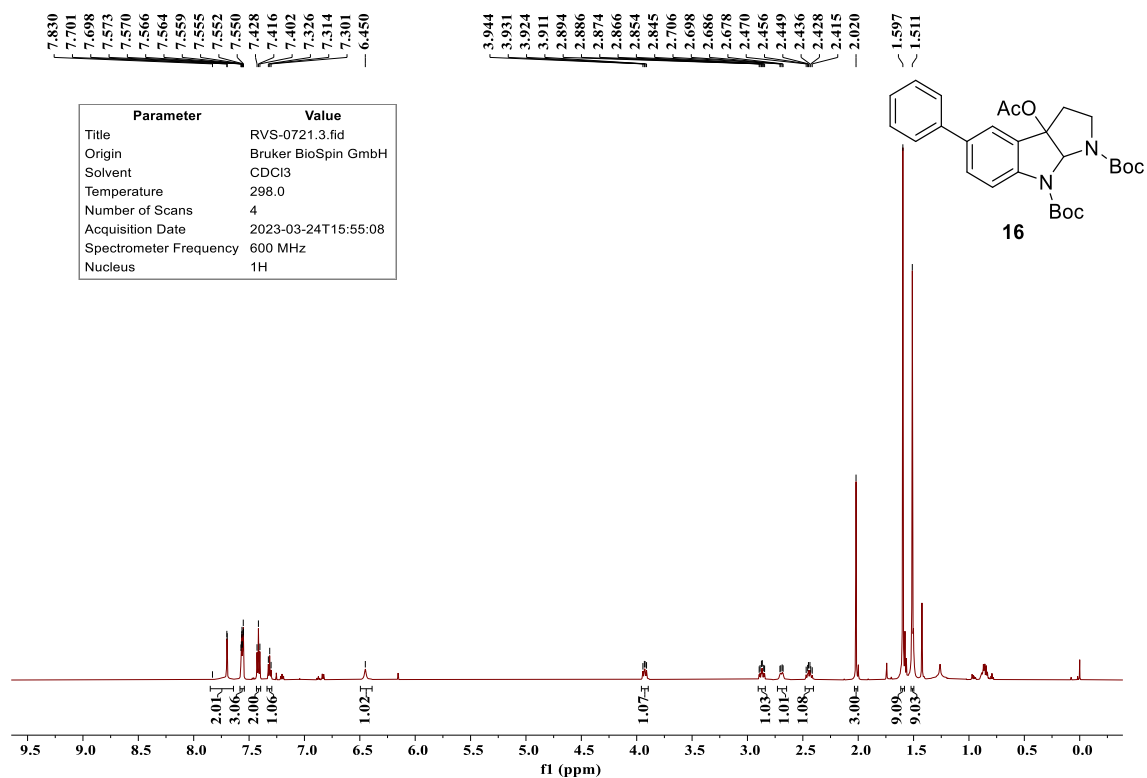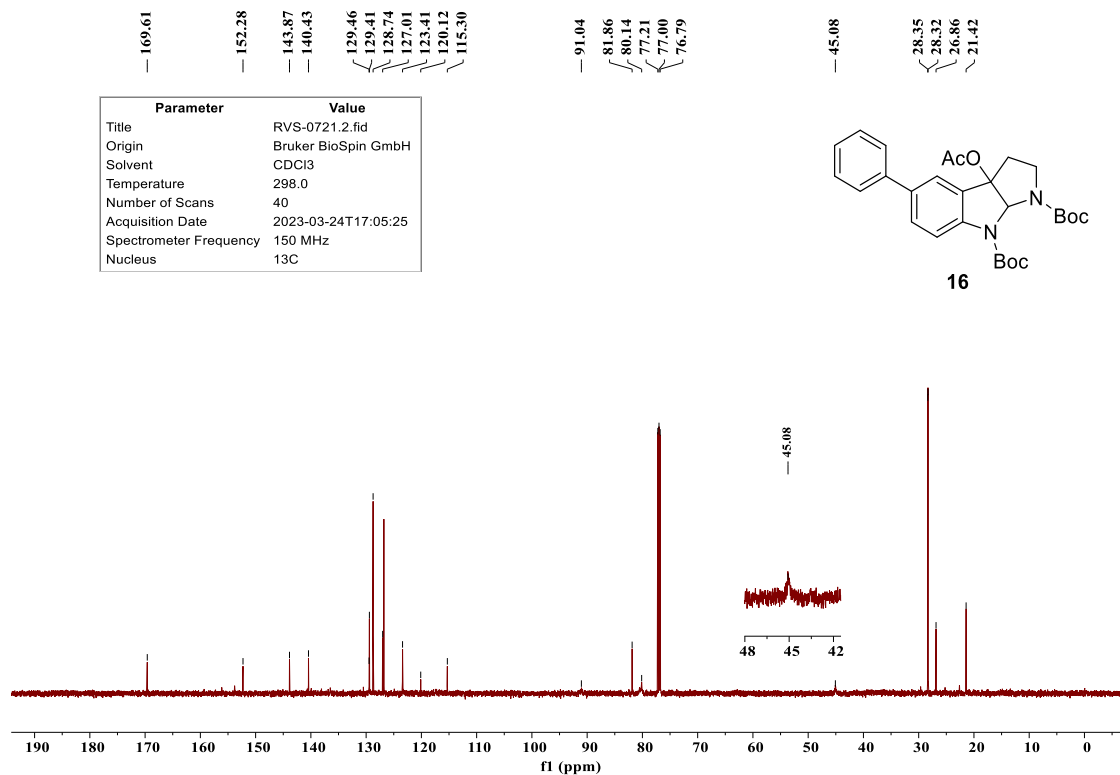





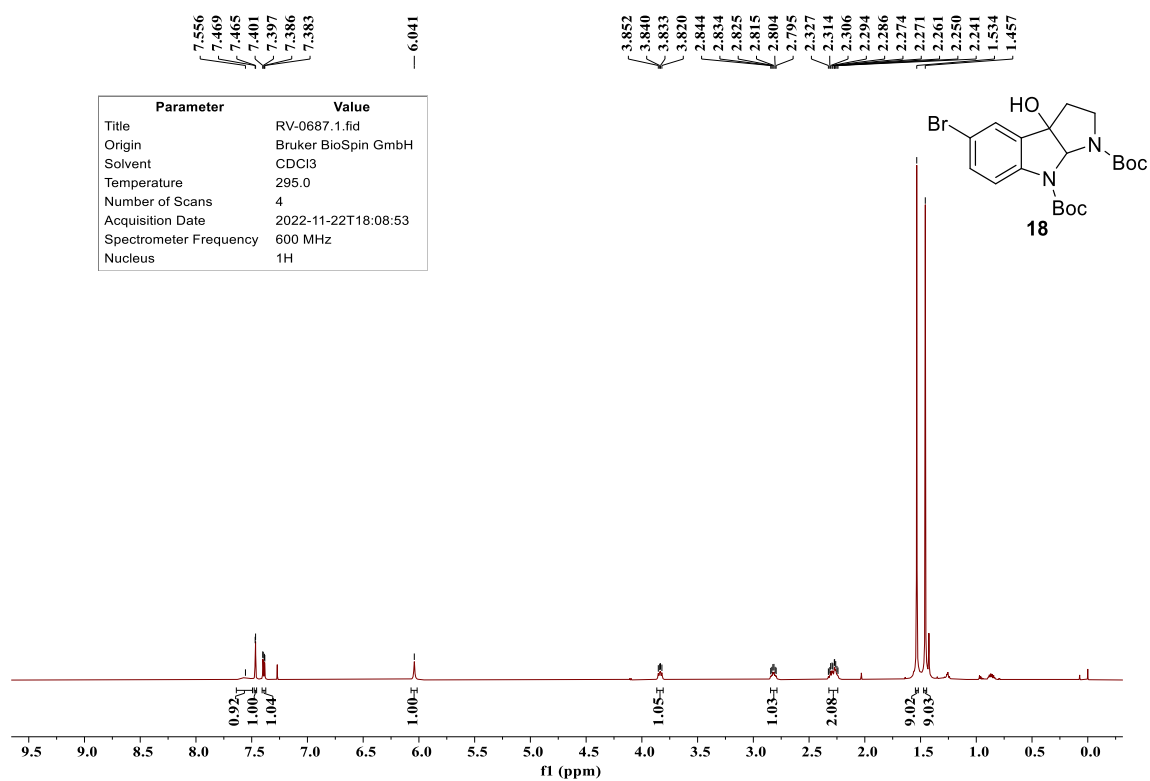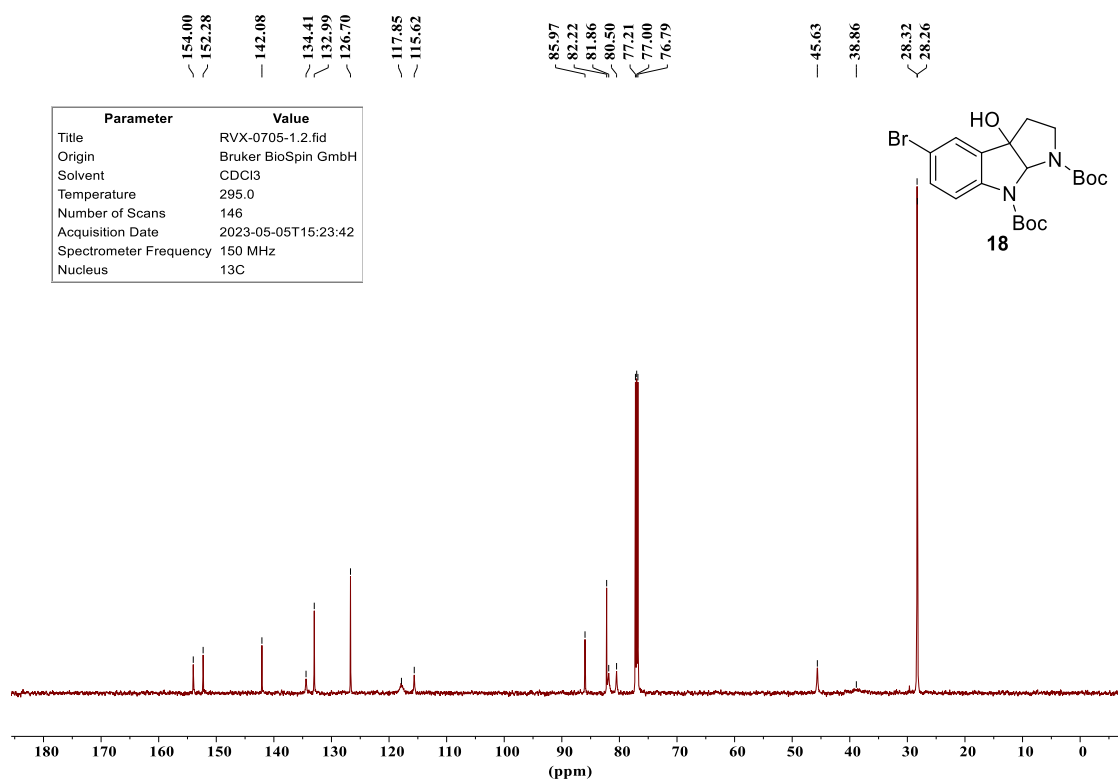

Supplement: d3ob00985h1.pdf [file d3ob00985h1.pdf]
